# Supplementary material for: Pd-catalyzed direct oxidative mono-aroyloxylation of O-aralkyl substituted acetoxime ethers
Source: Royal Society of Chemistry journal article supplement (doi:10.1039/c6ra16105g), 2016-01-01

## Supporting Information

### **Pd-Catalyzed Direct Oxidative *mono*-Aroyloxylation of *O*- Aralkyl Substituted Acetoxime Ethers**

Ling-Yan Shao,<sup>a</sup> Chao Li,<sup>a,b</sup> Ying Guo,<sup>a</sup> Kun-Kun Yu,<sup>a</sup> Fei-Yi Zhao,<sup>a</sup> Wen-Li Qiao,<sup>a</sup>  
Hong-Wei Liu,<sup>a</sup> Dao-Hua Liao,<sup>\*a</sup> and Ya-Fei Ji<sup>\*a</sup>

---

<sup>a</sup> School of Pharmacy, East China University of Science & Technology, 130 Meilong Road,  
Shanghai 200237, P. R. China.

---

Fax: (+86)-021-6425-3314

E-mail: jyf@ecust.edu.cn (Y. F. Ji) or liaodh@ecust.edu.cn (D. H. Liao).

<sup>b</sup> Roche R & D Center (China) Ltd., 720 Cailun Road, Shanghai 201203, P. R. China

#### **Content**

|                                                                  |     |
|------------------------------------------------------------------|-----|
| 1 General Information.....                                       | S2  |
| 2 General Procedures and Characterization Data of Compounds..... | S2  |
| 3 Selectively Cleavage of N–O Bond.....                          | S13 |
| 4 Kinetic Isotope Effect Experiment.....                         | S14 |
| 5 All Copies of Spectra.....                                     | S15 |

## 1. General Information

Unless otherwise indicated, all reagents were obtained from commercial sources and used as received without further purification. All reactions were carried out in oven-dried glassware and monitored by thin layer chromatography (TLC, pre-coated silica gel plates containing HF<sub>254</sub>). All solvents were only dried over 4 Å molecular sieves. Reaction products were purified *via* column chromatography on silica gel (300–400 mesh). Melting points were determined using an open capillaries and uncorrected. NMR spectra were determined on Bruker AV400 in CDCl<sub>3</sub> with TMS as internal standard for <sup>1</sup>H NMR (400 MHz) and <sup>13</sup>C NMR (100 MHz), respectively. HRMS were measured on a QSTAR Pulsar I LC/TOF MS mass spectrometer or Micromass GCTTM gas chromatograph-mass spectrometer.

## 2. General Procedures and Characterization Data of Compounds

### 2.1 Investigations of the reaction parameters (Table 1).<sup>[a]</sup>

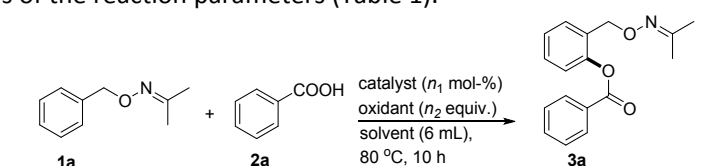

| Entry             | Catalyst ( $n_1$ mol-%)                                                                       | Oxidant ( $n_2$ equiv.)                              | Solvent                 | Yield (%) <sup>[b]</sup> |
|-------------------|-----------------------------------------------------------------------------------------------|------------------------------------------------------|-------------------------|--------------------------|
| 1                 | Pd(OAc) <sub>2</sub> (10)                                                                     | K <sub>2</sub> S <sub>2</sub> O <sub>8</sub> (2.0)   | DCE                     | 67                       |
| 2                 | Pd(OAc) <sub>2</sub> (10)                                                                     | oxone (2.0)                                          | DCE                     | 65                       |
| 3                 | Pd(OAc) <sub>2</sub> (10)                                                                     | PhI(OAc) <sub>2</sub> (2.0)                          | DCE                     | 61                       |
| 4                 | Pd(OAc) <sub>2</sub> (10)                                                                     | Na <sub>2</sub> S <sub>2</sub> O <sub>8</sub> (2.0)  | DCE                     | 59                       |
| 5                 | Pd(OAc) <sub>2</sub> (10)                                                                     | TBHP (2.0)                                           | DCE                     | 0                        |
| 6                 | Pd(OAc) <sub>2</sub> (10)                                                                     | AgOAc (2.0)                                          | DCE                     | 0                        |
| 7                 | Pd(OAc) <sub>2</sub> (10)                                                                     | K <sub>2</sub> S <sub>2</sub> O <sub>8</sub> (2.0)   | CH <sub>3</sub> CN      | 71                       |
| 8                 | Pd(OAc) <sub>2</sub> (10)                                                                     | K <sub>2</sub> S <sub>2</sub> O <sub>8</sub> (2.0)   | DCM                     | 61                       |
| 9                 | Pd(OAc) <sub>2</sub> (10)                                                                     | K <sub>2</sub> S <sub>2</sub> O <sub>8</sub> (2.0)   | DMSO                    | 0                        |
| <b>10</b>         | <b>Pd(OAc)<sub>2</sub> (10)</b>                                                               | <b>K<sub>2</sub>S<sub>2</sub>O<sub>8</sub> (3.0)</b> | <b>CH<sub>3</sub>CN</b> | <b>76</b>                |
| 11                | Pd(OAc) <sub>2</sub> (10)                                                                     | K <sub>2</sub> S <sub>2</sub> O <sub>8</sub> (4.0)   | CH <sub>3</sub> CN      | 76                       |
| 12 <sup>[c]</sup> | Pd(OAc) <sub>2</sub> (10)                                                                     | K <sub>2</sub> S <sub>2</sub> O <sub>8</sub> (3.0)   | CH <sub>3</sub> CN      | 70                       |
| 13 <sup>[d]</sup> | Pd(OAc) <sub>2</sub> (10)                                                                     | K <sub>2</sub> S <sub>2</sub> O <sub>8</sub> (3.0)   | CH <sub>3</sub> CN      | 55                       |
| 14                | ( $\eta^3$ -C <sub>3</sub> H <sub>5</sub> ) <sub>2</sub> Pd <sub>2</sub> Cl <sub>2</sub> (10) | K <sub>2</sub> S <sub>2</sub> O <sub>8</sub> (3.0)   | CH <sub>3</sub> CN      | 31                       |
| 15                | PdCl <sub>2</sub> (10)                                                                        | K <sub>2</sub> S <sub>2</sub> O <sub>8</sub> (3.0)   | CH <sub>3</sub> CN      | 0                        |
| 16                | (Ph <sub>3</sub> P) <sub>2</sub> PdCl <sub>2</sub> (10)                                       | K <sub>2</sub> S <sub>2</sub> O <sub>8</sub> (3.0)   | CH <sub>3</sub> CN      | 0                        |
| 17                | Pd(OAc) <sub>2</sub> (15)                                                                     | K <sub>2</sub> S <sub>2</sub> O <sub>8</sub> (3.0)   | CH <sub>3</sub> CN      | 67                       |
| 18                | Pd(OAc) <sub>2</sub> (5)                                                                      | K <sub>2</sub> S <sub>2</sub> O <sub>8</sub> (3.0)   | CH <sub>3</sub> CN      | 65                       |

[a] Reaction conditions: **1a** (1.0 mmol), **2a** (2.0 mmol), catalyst ( $n_1$  mol-%), oxidant ( $n_2$  equiv.), solvent (6 mL) at 80 °C for 10 h; [b] Isolated yields; [c] 60 °C; [d] 100 °C. DMSO = dimethylsulfoxide; DCM = dichloromethane; DCE = 1,2-dichloroethane.

**General procedure:** A mixture of substrate **1a** (1.0 mmol), **2a** (2.0 mmol), Pd(OAc)<sub>2</sub> ( $n_1$  mol-%), oxidant ( $n_2$  equiv.) and solvent (6 mL) was stirred at specific temperature for 10 h. Upon completion of the reaction, the mixture was dropped into the saturated NaHCO<sub>3</sub> solution (30 mL).

The solution was extracted with ethyl acetate (25 mL×3), and then the combined organic layers were dried over anhydrous MgSO<sub>4</sub>. Finally, the solution was concentrated *in vacuo* to provide a crude product, which was purified *via* a column chromatography on silica gel (eluents: petroleum ether/ethyl acetate 20:1) to supply the desired product **3a**.

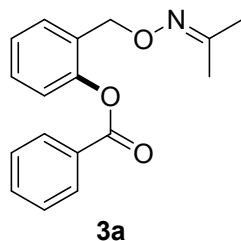

**2-(((propan-2-ylideneamino)oxy)methyl)phenyl benzoate (3a)**: white solid, 215.2 mg (76%), m.p. 72–74 °C; IR (cm<sup>-1</sup>)  $\bar{\nu}$  3063, 2930, 2855, 1728, 1599, 1452, 1370, 1217, 1107, 954, 763, 703; <sup>1</sup>H NMR (400 MHz, CDCl<sub>3</sub>, ppm):  $\delta$  8.22 (s, 1H), 8.21 (s, 1H), 7.64 (t,  $J$  = 7.6 Hz, 1H), 7.53–7.50 (m, 2H), 7.49–7.48 (m, 1H), 7.39 (dt,  $J_1$  = 7.6 Hz,  $J_2$  = 1.6 Hz, 1H), 7.29 (dd,  $J_1$  = 7.6 Hz,  $J_2$  = 1.2 Hz, 1H), 7.23 (dd,  $J_1$  = 8.0 Hz,  $J_2$  = 1.2 Hz, 1H), 5.12 (s, 2H), 1.77 (s, 3H), 1.76 (s, 3H); <sup>13</sup>C NMR (100 MHz, CDCl<sub>3</sub>, ppm):  $\delta$  165.0, 155.4, 149.1, 133.6, 130.5, 130.3 (2C), 129.9, 129.5, 128.9, 128.6 (2C), 126.0, 122.6, 70.7, 21.7, 15.6; HRMS (EI):  $m/z$  [M<sup>+</sup>] calcd. for C<sub>17</sub>H<sub>17</sub>NO<sub>3</sub>: 283.1208, found: 283.1204.

## 2.2 X-Ray crystallographic data of 3a

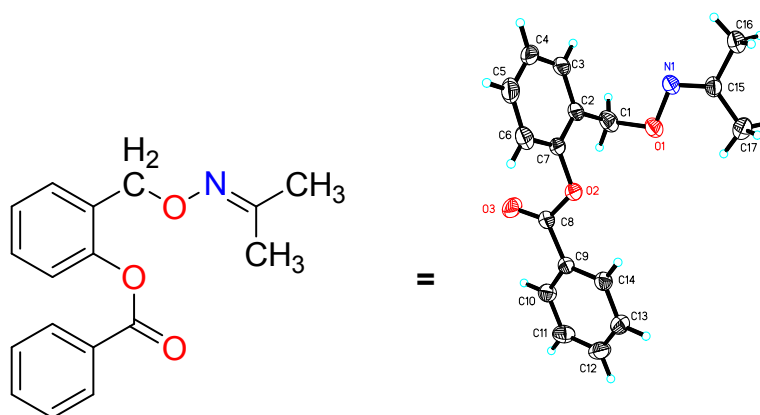

Crystal data and structure refinement for cd16181.

|                      |                                                  |          |
|----------------------|--------------------------------------------------|----------|
| Identification code  | cd16181                                          |          |
| Empirical formula    | C <sub>17</sub> H <sub>17</sub> N O <sub>3</sub> |          |
| Formula weight       | 283.31                                           |          |
| Temperature          | 293(2) K                                         |          |
| Wavelength           | 0.71073 Å                                        |          |
| Crystal system       | Orthorhombic                                     |          |
| Space group          | P b c a                                          |          |
| Unit cell dimensions | a = 12.049(3) Å                                  | a = 90°. |
|                      | b = 7.1678(19) Å                                 | b = 90°. |
|                      | c = 35.147(9) Å                                  | g = 90°. |

|                                   |                                             |
|-----------------------------------|---------------------------------------------|
| Volume                            | 3035.4(14) Å <sup>3</sup>                   |
| Z                                 | 8                                           |
| Density (calculated)              | 1.240 Mg/m <sup>3</sup>                     |
| Absorption coefficient            | 0.085 mm <sup>-1</sup>                      |
| F(000)                            | 1200                                        |
| Crystal size                      | 0.180 x 0.150 x 0.120 mm <sup>3</sup>       |
| Theta range for data collection   | 2.049 to 25.499°.                           |
| Index ranges                      | -14<=h<=14, -8<=k<=6, -42<=l<=42            |
| Reflections collected             | 16093                                       |
| Independent reflections           | 2827 [R(int) = 0.0783]                      |
| Completeness to theta = 25.242°   | 99.9 %                                      |
| Absorption correction             | Semi-empirical from equivalents             |
| Max. and min. transmission        | 0.7456 and 0.6359                           |
| Refinement method                 | Full-matrix least-squares on F <sup>2</sup> |
| Data / restraints / parameters    | 2827 / 0 / 193                              |
| Goodness-of-fit on F <sup>2</sup> | 1.023                                       |
| Final R indices [I>2sigma(I)]     | R1 = 0.0553, wR2 = 0.1462                   |
| R indices (all data)              | R1 = 0.0913, wR2 = 0.1661                   |
| Largest diff. peak and hole       | 0.172 and -0.154 e.Å <sup>-3</sup>          |

### 2.3 Investigation on the substrate scope of aromatic acids (Scheme 3)

**General procedure:** A mixture of substrate **1a** (1.0 mmol), **2** (2.0 mmol), Pd(OAc)<sub>2</sub> (0.10 mmol), and K<sub>2</sub>S<sub>2</sub>O<sub>8</sub> (3.0 mmol) was dissolved in CH<sub>3</sub>CN (6 mL), then the reaction mixture was heated at 80 °C for 10 h, or a specific time of 15 h. Upon completion of the reaction, the mixture was dropped into the saturated NaHCO<sub>3</sub> solution (30 mL). The solution was extracted with ethyl acetate (25 mL×3), and then the combined organic layers were dried over anhydrous MgSO<sub>4</sub>. Finally, the solution was concentrated *in vacuo* to provide a crude product, which was purified *via* a column chromatography on silica gel (eluent: petroleum ether/ethyl acetate 20:1) to supply the desired product **3**.

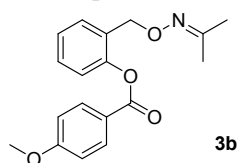

**2-(((propan-2-ylideneamino)oxy)methyl)phenyl 4-methoxybenzoate (3b):** white solid, 253.6 mg (81%), m.p. 74–76 °C; IR (cm<sup>-1</sup>)  $\bar{\nu}$  3066, 2919, 2849, 1729, 1455, 1316, 1251, 1162, 1065, 918, 845, 749; <sup>1</sup>H NMR (400 MHz, CDCl<sub>3</sub>, ppm):  $\delta$  8.15 (d, *J* = 9.2 Hz, 2H), 7.47 (d, *J* = 7.6 Hz, 1H), 7.36 (t, *J* = 8.0 Hz, 1H), 7.25 (t, *J* = 7.6 Hz, 1H), 7.21 (d, *J* = 8.0 Hz, 1H), 6.97 (d, *J* = 8.8 Hz, 2H), 5.10 (s, 2H), 3.86 (s, 3H), 1.77 (s, 3H), 1.76 (s, 3H); <sup>13</sup>C NMR (100 MHz, CDCl<sub>3</sub>, ppm):  $\delta$  164.7, 163.9, 155.4, 149.2, 132.4 (2C), 130.6, 129.8, 128.9, 125.9, 122.7, 121.9, 113.9 (2C), 70.7, 55.6, 21.8, 15.7; HRMS (EI): *m/z* [M<sup>+</sup>] calcd. for C<sub>18</sub>H<sub>19</sub>NO<sub>4</sub>: 313.1314, found 313.1316.

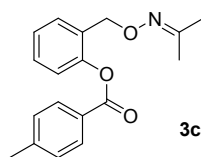

**2-(((propan-2-ylideneamino)oxy)methyl)phenyl 4-methylbenzoate (3c)**: white solid, 226.8 mg (79%), m.p. 86–88 °C; IR (cm<sup>-1</sup>)  $\bar{\nu}$  3063, 2929, 1726, 1655, 1492, 1446, 1374, 1217, 1107, 978, 879, 824, 781; <sup>1</sup>H NMR (400 MHz, CDCl<sub>3</sub>, ppm):  $\delta$  8.09 (d,  $J$  = 8.0 Hz, 2H), 7.49 (d,  $J$  = 7.2 Hz, 1H), 7.38 (t,  $J$  = 8.0 Hz, 1H), 7.32–7.26 (m, 3H), 7.22 (d,  $J$  = 7.6 Hz, 1H), 5.11 (s, 2H), 2.45 (s, 3H), 1.78 (s, 3H), 1.77 (s, 3H); <sup>13</sup>C NMR (100 MHz, CDCl<sub>3</sub>, ppm):  $\delta$  165.0, 155.4, 149.2, 144.4, 130.6, 130.4 (2C), 129.9, 129.3 (2C), 128.9, 126.8, 126.0, 122.7, 70.7, 21.84, 21.82, 15.7; HRMS (EI):  $m/z$  [M<sup>+</sup>] calcd. for C<sub>18</sub>H<sub>19</sub>NO<sub>3</sub>: 297.1365, found 297.1362.

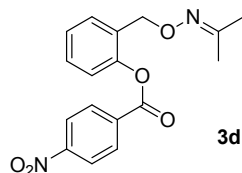

**2-(((propan-2-ylideneamino)oxy)methyl)phenyl 4-nitrobenzoate (3d)**: yellow solid, 196.9 mg (60%), m.p. 65–67 °C; IR (cm<sup>-1</sup>)  $\bar{\nu}$  3112, 2923, 2855, 1744, 1605, 1519, 1453, 1344, 1259, 1025, 988, 869, 750, 711; <sup>1</sup>H NMR (400 MHz, CDCl<sub>3</sub>, ppm):  $\delta$  8.37 (dd,  $J_1$  = 14.4 Hz,  $J_2$  = 9.2 Hz, 4H), 7.50 (dd,  $J_1$  = 7.6 Hz,  $J_2$  = 1.6 Hz, 1H), 7.41 (td,  $J_1$  = 7.6 Hz,  $J_2$  = 1.6 Hz, 1H), 7.32 (td,  $J_1$  = 7.6 Hz,  $J_2$  = 1.6 Hz, 1H), 7.24 (dd,  $J_1$  = 8.0 Hz,  $J_2$  = 1.2 Hz, 1H), 5.09 (s, 2H), 1.75 (s, 3H), 1.74 (s, 3H); <sup>13</sup>C NMR (100 MHz, CDCl<sub>3</sub>, ppm):  $\delta$  163.2, 155.6, 151.0, 148.9, 135.1, 131.4 (2C), 130.4, 130.3, 129.7, 126.7, 123.8 (2C), 122.4, 70.8, 21.8, 15.7; HRMS (EI):  $m/z$  [M<sup>+</sup>] calcd. for C<sub>17</sub>H<sub>16</sub>N<sub>2</sub>O<sub>5</sub>: 328.1059, found 328.1051.

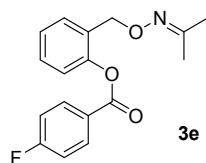

**2-(((propan-2-ylideneamino)oxy)methyl)phenyl 4-fluorobenzoate (3e)**: yellow oil, 201.7 mg (67%); IR (cm<sup>-1</sup>)  $\bar{\nu}$  3073, 2921, 2851, 1737, 1601, 1505, 1453, 1366, 1261, 1152, 1066, 1014, 852, 749, 684; <sup>1</sup>H NMR (400 MHz, CDCl<sub>3</sub>, ppm):  $\delta$  8.25–8.21 (m, 2H), 7.74 (dd,  $J_1$  = 7.6 Hz,  $J_2$  = 1.6 Hz, 1H), 7.38 (dt,  $J_1$  = 8.0 Hz,  $J_2$  = 1.6 Hz, 1H), 7.29 (dd,  $J_1$  = 7.2 Hz,  $J_2$  = 1.2 Hz, 1H), 7.23–7.15 (m, 3H), 5.10 (s, 2H), 1.77 (s, 3H), 1.76 (s, 3H); <sup>13</sup>C NMR (100 MHz, CDCl<sub>3</sub>, ppm):  $\delta$  166.2 (d, <sup>1</sup> $J_{CF}$  = 254.9 Hz), 164.0, 155.4, 149.1, 132.9 (d, <sup>3</sup> $J_{CF}$  = 9.4 Hz, 2C), 130.5, 130.1, 129.0, 126.2, 125.8 (d, <sup>4</sup> $J_{CF}$  = 3.0 Hz), 122.6, 115.9 (d, <sup>2</sup> $J_{CF}$  = 22.0 Hz, 2C), 70.8, 21.8, 15.7; HRMS (EI):  $m/z$  [M<sup>+</sup>] calcd. for C<sub>17</sub>H<sub>16</sub>FNO<sub>3</sub>: 301.1114, found 301.1119.

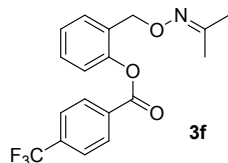

**2-(((propan-2-ylideneamino)oxy)methyl)phenyl 4-(trifluoromethyl)benzoate (3f)**: white solid, 228.2 mg (65%), m.p. 69–71 °C; IR (cm<sup>-1</sup>)  $\bar{\nu}$  3080, 2951, 2915, 1740, 1267, 1166, 1109, 1077, 1006, 989, 860, 766, 701; <sup>1</sup>H NMR (400 MHz, CDCl<sub>3</sub>, ppm):  $\delta$  8.33 (d,  $J$  = 8.0 Hz, 2H), 7.78 (d,  $J$  = 8.0 Hz, 2H), 7.50 (dd,  $J_1$  = 7.6 Hz,  $J_2$  = 1.2 Hz, 1H), 7.41 (dt,  $J_1$  = 8.0 Hz,  $J_2$  = 1.6 Hz, 1H), 7.30 (dt,  $J_1$  = 7.2 Hz,  $J_2$  = 1.2 Hz, 1H), 7.23 (dd,  $J_1$  = 8.0 Hz,  $J_2$  = 1.2 Hz, 1H), 5.10 (s, 2H), 1.75 (s, 3H), 1.74 (s, 3H); <sup>13</sup>C NMR (100 MHz, CDCl<sub>3</sub>, ppm):  $\delta$  163.8, 155.4, 149.0, 135.0 (q, <sup>2</sup> $J_{CF}$  = 32.5 Hz), 132.9, 130.7 (2C), 130.4, 130.3, 129.2, 123.7 (q, <sup>1</sup> $J_{CF}$  = 271.1 Hz), 126.4, 125.7 (q, <sup>3</sup> $J_{CF}$  = 3.6

Hz, 2C), 122.5, 70.8, 21.8, 15.6 (C<sub>18</sub>H<sub>16</sub>O<sub>3</sub>NF<sub>3</sub>) ; HRMS (EI): *m/z* [M-NO-C<sub>3</sub>H<sub>6</sub>]<sup>+</sup> calcd. for C<sub>15</sub>H<sub>10</sub>O<sub>2</sub>F<sub>3</sub>: 279.0633, found 279.0634.

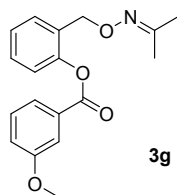

**2-(((propan-2-ylideneamino)oxy)methyl)phenyl 3-methoxybenzoate (3g)**: yellow oil, 247.4 mg (79%); IR (cm<sup>-1</sup>)  $\bar{\nu}$  3075, 2919, 2840, 1744, 1599, 1488, 1455, 1365, 1295, 1236, 1211, 1169, 1021, 880, 751, 694; <sup>1</sup>H NMR (400 MHz, CDCl<sub>3</sub>, ppm):  $\delta$  8.05 (d, *J* = 8.0 Hz, 1H), 7.55 (t, *J* = 8.0 Hz, 1H), 7.49 (d, *J* = 7.2 Hz, 1H), 7.36 (t, *J* = 7.6 Hz, 1H), 7.26 (t, *J* = 6.8 Hz, 2H), 7.04 (t, *J* = 6.4 Hz, 2H), 5.15 (s, 2H), 3.95 (s, 3H), 1.82 (s, 6H); <sup>13</sup>C NMR (100 MHz, CDCl<sub>3</sub>, ppm):  $\delta$  164.1, 159.8, 155.2, 149.0, 134.3, 132.3, 130.5, 129.6, 128.7, 125.8, 122.7, 120.1, 119.0, 112.1, 70.6, 55.9, 21.8, 15.6; HRMS (EI): *m/z* [M<sup>+</sup>] calcd. for C<sub>18</sub>H<sub>19</sub>NO<sub>4</sub>: 313.1314, found 313.1317.

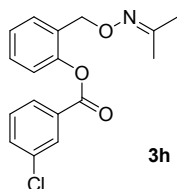

**2-(((propan-2-ylideneamino)oxy)methyl)phenyl 3-chlorobenzoate (3h)**: white oil, 218.8 mg (69%); IR (cm<sup>-1</sup>)  $\bar{\nu}$  3068, 2920, 2851, 1738, 1575, 1453, 1370, 1285, 1243, 1170, 1061, 882, 790, 739; <sup>1</sup>H NMR (400 MHz, CDCl<sub>3</sub>, ppm):  $\delta$  8.19 (s, 1H), 8.09 (d, *J* = 7.6 Hz, 1H), 7.61 (d, *J* = 8.0 Hz, 1H), 7.48 (t, *J* = 8.4 Hz, 2H), 7.39 (t, *J* = 7.6 Hz, 1H), 7.30 (d, *J* = 7.2 Hz, 1H), 7.22 (d, *J* = 8.0 Hz, 1H), 5.09 (s, 2H), 1.77 (s, 6H); <sup>13</sup>C NMR (100 MHz, CDCl<sub>3</sub>, ppm):  $\delta$  163.8, 155.5, 149.1, 134.8, 133.7, 131.4, 130.4, 130.3, 130.2, 130.0, 129.1, 128.4, 126.3, 122.5, 70.9, 21.8, 15.7 (C<sub>17</sub>H<sub>16</sub>O<sub>3</sub>NCl); HRMS (EI): *m/z* [M-NO-C<sub>3</sub>H<sub>6</sub>]<sup>+</sup> calcd. for C<sub>14</sub>H<sub>10</sub>O<sub>2</sub><sup>35</sup>Cl: 245.0369, found 245.0365.

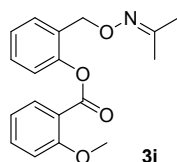

**2-(((propan-2-ylideneamino)oxy)methyl)phenyl 2-methoxybenzoate (3i)**: yellow oil, 244.2 mg (78%); IR (cm<sup>-1</sup>)  $\bar{\nu}$  3075, 2919, 2841, 1759, 1599, 1488, 1455, 1366, 1236, 1210, 1174, 1021, 880, 750; <sup>1</sup>H NMR (400 MHz, CDCl<sub>3</sub>, ppm):  $\delta$  8.05 (dd, *J* = 8.0 Hz, *J* = 1.6 Hz, 1H), 7.55 (dt, *J*<sub>1</sub> = 7.6 Hz, *J*<sub>2</sub> = 1.2 Hz, 1H), 7.49 (d, *J* = 7.6 Hz, 1H), 7.36 (dt, *J*<sub>1</sub> = 7.6 Hz, *J*<sub>2</sub> = 1.6 Hz, 1H), 7.28–7.26 (m, 1H), 7.26–7.23 (m, 1H), 7.04 (t, *J* = 6.8 Hz, 2H), 5.16 (s, 3H), 3.94 (s, 3H), 1.82 (s, 6H); <sup>13</sup>C NMR (100 MHz, CDCl<sub>3</sub>, ppm):  $\delta$  164.2, 159.9, 155.4, 149.1, 134.3, 132.4, 130.6, 129.7, 128.8, 125.9, 122.8, 120.2, 119.1, 77.2, 70.7, 56.0, 21.9, 15.8; HRMS (EI): *m/z* [M<sup>+</sup>] calcd. for C<sub>18</sub>H<sub>19</sub>NO<sub>4</sub>: 313.1314, found 313.1315.

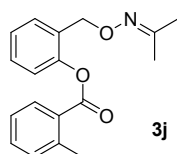

**2-(((propan-2-ylideneamino)oxy)methyl)phenyl 2-methylbenzoate (3j)**: yellow oil, 219.9 mg (74%); IR (cm<sup>-1</sup>)  $\bar{\nu}$  3066, 2919, 2851, 1736, 1487, 1454, 1453, 1362, 1239, 1212, 1175, 1040, 880, 735; <sup>1</sup>H NMR (400 MHz, CDCl<sub>3</sub>, ppm):  $\delta$  8.21 (d,  $J$  = 8.0 Hz, 1H), 7.51–7.46 (m, 2H), 7.39 (t,  $J$  = 7.6 Hz, 1H), 7.34–7.27 (m, 3H), 7.21 (d,  $J$  = 7.6 Hz, 1H), 5.12 (s, 2H), 2.68 (s, 3H), 1.79 (s, 6H); <sup>13</sup>C NMR (100 MHz, CDCl<sub>3</sub>, ppm):  $\delta$  165.5, 155.3, 149.1, 141.4, 132.8, 132.0, 131.4, 130.5, 129.9, 128.9, 128.4, 126.0, 125.9, 122.7, 70.7, 22.0, 21.7, 15.6; HRMS (EI):  $m/z$  [M<sup>+</sup>] calcd. for C<sub>18</sub>H<sub>19</sub>N<sub>2</sub>O<sub>3</sub>: 297.1365, found 297.1366.

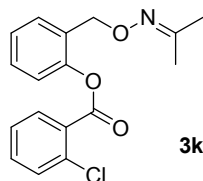

**2-propanone, O-((2-(2-chloro-benoyloxy)phenyl)methyloxime) (3k)**: yellow oil, 193.4 mg (61%); IR (cm<sup>-1</sup>)  $\bar{\nu}$  3066, 2921, 2871, 1747, 1590, 1489, 1366, 1284, 1213, 1239, 1174, 1111, 1032, 1071, 918, 879, 745; <sup>1</sup>H NMR (400 MHz, CDCl<sub>3</sub>, ppm):  $\delta$  8.11 (d,  $J$  = 7.6 Hz, 1H), 7.55–7.47 (m, 3H), 7.41–7.36 (m, 2H), 7.30 (d,  $J$  = 7.6 Hz, 1H), 7.27–7.24 (m, 1H), 5.13 (s, 2H), 1.80 (s, 6H); <sup>13</sup>C NMR (100 MHz, CDCl<sub>3</sub>, ppm):  $\delta$  162.7, 154.6, 148.0, 133.7, 132.3, 131.2, 130.5, 129.5, 129.2, 128.2, 128.1, 125.8, 125.3, 121.6, 60.8, 20.9, 14.8 (C<sub>17</sub>H<sub>16</sub>O<sub>3</sub>NCl); HRMS (EI):  $m/z$  [M-NO-C<sub>3</sub>H<sub>6</sub>]<sup>+</sup> calcd. for C<sub>14</sub>H<sub>10</sub>O<sub>2</sub><sup>35</sup>Cl: 245.0369, found 245.0366.

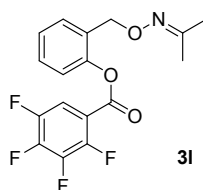

**2-(((propan-2-ylideneamino)oxy)methyl)phenyl 2,3,4,5-tetrafluorobenzoate (3l)**: yellow oil, 181.1 mg (51%); IR (cm<sup>-1</sup>)  $\bar{\nu}$  3081, 2923, 2854, 1741, 1627, 1524, 1484, 1367, 1192, 1087, 1016, 879, 742; <sup>1</sup>H NMR (400 MHz, CDCl<sub>3</sub>, ppm):  $\delta$  7.83–7.75 (m, 1H), 7.49 (dd,  $J_1$  = 7.6 Hz,  $J_2$  = 1.6 Hz, 1H), 7.40 (dt,  $J_1$  = 7.6 Hz,  $J_2$  = 1.6 Hz, 1H), 7.31 (dt,  $J_1$  = 7.6 Hz,  $J_2$  = 1.2 Hz, 1H), 7.22 (dd,  $J_1$  = 8.0 Hz,  $J_2$  = 0.8 Hz, 1H), 5.08 (s, 2H), 1.78 (s, 3H), 1.77 (s, 3H); <sup>13</sup>C NMR (100 MHz, CDCl<sub>3</sub>, ppm):  $\delta$  160.3, 155.6, 149.8, 148.7, 147.2, 142.9, 130.6, 130.3, 129.2, 126.7, 122.3, 114.6, 113.8 (d,  $J$  = 34.0 Hz), 113.6 (d,  $J$  = 35.0 Hz), 70.77, 21.81, 15.65; HRMS (EI):  $m/z$  [M<sup>+</sup>] calcd. for C<sub>17</sub>H<sub>13</sub>NO<sub>3</sub>F<sub>4</sub>: 355.0832, found 355.0834.

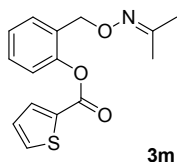

**2-(((propan-2-ylideneamino)oxy)methyl)phenyl thiophene-2-carboxylate (2r)**: yellow oil, 176.3 mg (61%); IR (cm<sup>-1</sup>)  $\bar{\nu}$  3102, 2963, 2930, 2865, 1707, 1491, 1218, 1006, 979, 875, 822, 732, 755; <sup>1</sup>H NMR (400 MHz, CDCl<sub>3</sub>, ppm):  $\delta$  7.91 (d,  $J$  = 3.6 Hz, 1H), 7.59 (d,  $J$  = 5.2 Hz, 1H), 7.41 (d,  $J$  = 7.2 Hz, 1H), 7.31 (t,  $J$  = 6.4 Hz, 1H), 7.23–7.15 (m, 2H), 7.11 (t,  $J$  = 7.0 Hz, 1H), 5.05 (s, 2H), 1.73 (s, 3H), 1.71 (s, 3H); <sup>13</sup>C NMR (100 MHz, CDCl<sub>3</sub>, ppm):  $\delta$  159.5, 154.6, 147.8, 133.8, 132.6, 131.8, 129.6, 129.0, 128.0, 127.1, 125.2, 121.6, 69.7, 20.8, 14.7 (C<sub>15</sub>H<sub>15</sub>O<sub>3</sub>NS); HRMS (EI):  $m/z$  [M-NO-C<sub>3</sub>H<sub>6</sub>]<sup>+</sup> calcd. for C<sub>12</sub>H<sub>9</sub>O<sub>2</sub>S: 217.0323, found 217.0317.

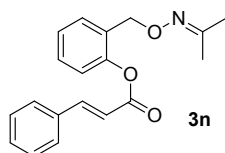

**1-(2-acetoxyphenyl)-5-phenyl-4-propyl-1H-pyrazole-3-carboxylate (3n):** white solid, 231.9 mg (75%); m.p. 62–64 °C; IR (cm<sup>-1</sup>)  $\bar{\nu}$  3062, 2933, 2865, 1720, 1637, 1491, 1449, 1303, 1140, 974, 878, 825, 765, 704; <sup>1</sup>H NMR (400 MHz, CDCl<sub>3</sub>, ppm):  $\delta$  7.87 (d,  $J$  = 16.0 Hz, 1H), 7.61–7.57 (m, 2H), 7.48 (dd,  $J_1$  = 7.6 Hz,  $J_2$  = 0.8 Hz, 1H), 7.44–7.42 (m, 3H), 7.36 (dt,  $J_1$  = 8.0 Hz,  $J_2$  = 1.6 Hz, 1H), 7.28–7.26 (m, 1H), 7.17 (d,  $J$  = 8.0 Hz, 1H), 7.65 (d,  $J$  = 16.0 Hz, 1H), 5.10 (s, 2H), 1.85 (s, 3H), 1.83 (s, 3H); <sup>13</sup>C NMR (100 MHz, CDCl<sub>3</sub>, ppm):  $\delta$  165.3, 155.7, 148.9, 146.7, 134.2, 130.8, 130.4, 129.8, 129.1 (2C), 128.9, 128.4 (2C), 126.0, 122.5, 117.1, 70.6, 21.9, 15.8; HRMS (EI):  $m/z$  [M<sup>+</sup>] calcd. for C<sub>19</sub>H<sub>19</sub>NO<sub>3</sub>: 309.1365, found 309.1364.

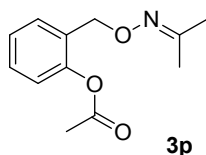

**2-(((propan-2-ylideneamino)oxy)methyl)phenyl acetate (3p):** yellow oil, 163.6 mg (74%); IR (cm<sup>-1</sup>)  $\bar{\nu}$  2921, 2852, 1764, 1488, 1453, 1366, 1203, 1166, 1010, 879, 750; <sup>1</sup>H NMR (400 MHz, CDCl<sub>3</sub>, ppm):  $\delta$  7.44 (dd,  $J_1$  = 7.6 Hz,  $J_2$  = 0.8 Hz, 1H), 7.33 (dt,  $J_1$  = 7.6 Hz,  $J_2$  = 1.6 Hz, 1H), 7.23 (t,  $J$  = 7.6 Hz, 1H), 7.07 (d,  $J$  = 8.0 Hz, 1H), 5.03 (s, 2H), 2.30 (s, 3H), 1.86 (s, 6H); <sup>13</sup>C NMR (100 MHz, CDCl<sub>3</sub>, ppm):  $\delta$  169.3, 155.4, 148.9, 130.3, 129.9, 128.9, 126.0, 122.4, 70.5, 21.8, 20.9, 15.6; HRMS (EI):  $m/z$  [M<sup>+</sup>] calcd. for C<sub>12</sub>H<sub>15</sub>NO<sub>3</sub>: 221.1052, found 221.1050.

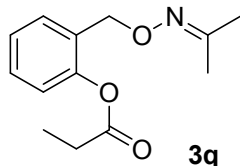

**2-(((propan-2-ylideneamino)oxy)methyl)phenyl propionate (3q):** yellow oil, 148.1 mg (63%); IR (cm<sup>-1</sup>)  $\bar{\nu}$  2984, 2919, 2881, 1759, 1488, 1454, 1364, 1174, 1136, 1071, 878, 752; <sup>1</sup>H NMR (400 MHz, CDCl<sub>3</sub>, ppm):  $\delta$  7.43 (dd,  $J_1$  = 7.6 Hz,  $J_2$  = 1.6 Hz, 1H), 7.32 (dt,  $J_1$  = 7.6 Hz,  $J_2$  = 1.6 Hz, 1H), 7.22 (dt,  $J_1$  = 7.2 Hz,  $J_2$  = 1.2 Hz, 1H), 7.07 (dd,  $J_1$  = 8.0 Hz,  $J_2$  = 1.2 Hz, 1H), 5.02 (s, 2H), 2.60 (q,  $J$  = 7.6 Hz, 2H), 1.86 (s, 3H), 1.85 (s, 3H), 1.27 (t,  $J$  = 7.6 Hz, 3H); <sup>13</sup>C NMR (100 MHz, CDCl<sub>3</sub>, ppm):  $\delta$  165.2, 157.3, 155.4, 142.4, 133.5, 131.5, 130.2, 129.6, 128.5, 123.2, 114.9, 113.7, 70.6, 55.6, 21.7, 15.6; HRMS (EI):  $m/z$  [M<sup>+</sup>] calcd. for C<sub>13</sub>H<sub>17</sub>NO<sub>3</sub>: 235.1208, found 235.1199.

#### 2.4 Investigation on the substrate scope of masked aralkylalcohols (Scheme 4).

**General procedure:** A mixture of substrate **1** (1.0 mmol), **2** (2.0 mmol), Pd(OAc)<sub>2</sub> (0.10 mmol), and K<sub>2</sub>S<sub>2</sub>O<sub>8</sub> (3.0 mmol) was dissolved in CH<sub>3</sub>CN (6 mL), then the reaction mixture was heated at 80 °C for 10 h. Upon completion of the reaction, the mixture was dropped into the saturated NaHCO<sub>3</sub> solution (30 mL). The solution was extracted with ethyl acetate (25 mL×3), and then the combined organic layers were dried over anhydrous MgSO<sub>4</sub>. Finally, the solution was concentrated *in vacuo* to provide a crude product, which was purified *via* a column chromatography on silica gel (eluent: petroleum ether/ethyl acetate 20:1) to supply the desired product **4**.



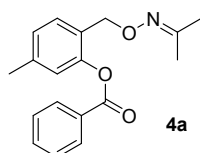

**5-methyl-2-(((propan-2-ylideneamino)oxy)methyl)phenyl benzoate (4a):** yellow solid, 243.7 mg (82%); m.p. 34–36 °C; IR (cm<sup>-1</sup>)  $\bar{\nu}$  3060, 2921, 2854, 1735, 1450, 1365, 1237, 1115, 1060, 1024, 880, 705; <sup>1</sup>H NMR (400 MHz, CDCl<sub>3</sub>, ppm):  $\delta$  8.20 (d,  $J$  = 7.2 Hz, 2H), 7.63 (t,  $J$  = 7.6 Hz, 1H), 7.50 (t,  $J$  = 7.6 Hz, 2H), 7.37 (d,  $J$  = 7.6 Hz, 1H), 7.10–7.04 (m, 2H), 5.07 (s, 2H), 2.38 (s, 3H), 1.75 (s, 6H); <sup>13</sup>C NMR (100 MHz, CDCl<sub>3</sub>, ppm):  $\delta$  165.2, 155.4, 149.2, 139.4, 133.6, 130.3 (2C), 130.1, 129.7, 128.6 (2C), 127.4, 126.9, 123.3, 70.8, 21.8, 21.3, 15.7; HRMS (EI):  $m/z$  [M<sup>+</sup>] calcd. for C<sub>18</sub>H<sub>19</sub>NO<sub>3</sub>: 297.1365, found 297.1371.

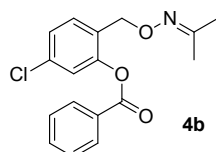

**5-chloro-2-(((propan-2-ylideneamino)oxy)methyl)phenyl benzoate (4b):** yellow solid, 197.0 mg (62%); m.p. 70–72 °C; IR (cm<sup>-1</sup>)  $\bar{\nu}$  3069, 2966, 2923, 2866, 1734, 1601, 1485, 1451, 1255, 1217, 1058, 895, 699; <sup>1</sup>H NMR (400 MHz, CDCl<sub>3</sub>, ppm):  $\delta$  8.18 (d,  $J$  = 7.6 Hz, 2H), 7.64 (t,  $J$  = 7.6 Hz, 1H), 7.50 (t,  $J$  = 7.6 Hz, 2H), 7.40 (d,  $J$  = 7.6 Hz, 1H), 7.26–7.23 (m, 2H), 5.05 (s, 2H), 1.75 (s, 3H), 1.74 (s, 3H); <sup>13</sup>C NMR (100 MHz, CDCl<sub>3</sub>, ppm):  $\delta$  164.5, 155.7, 149.4, 133.9, 133.8, 130.7, 130.3 (2C), 129.3, 129.0, 128.7 (2C), 126.3, 123.1, 70.1, 21.7, 15.6 (C<sub>17</sub>H<sub>16</sub>O<sub>3</sub>NCl); HRMS (EI):  $m/z$  [M-NO-C<sub>3</sub>H<sub>6</sub>]<sup>+</sup> calcd. for C<sub>14</sub>H<sub>10</sub>O<sub>2</sub><sup>35</sup>Cl: 245.0369, found 245.0327.

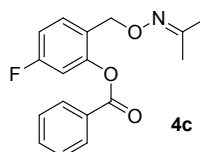

**5-fluoro-2-(((propan-2-ylideneamino)oxy)methyl)phenyl benzoate (4c):** white solid, 180.7 mg (60%); m.p. 68–70 °C; IR (cm<sup>-1</sup>)  $\bar{\nu}$  3075, 2948, 2923, 2853, 1729, 1599, 1500, 1452, 1248, 1144, 1062, 986, 873, 823, 702; <sup>1</sup>H NMR (400 MHz, CDCl<sub>3</sub>, ppm):  $\delta$  8.22–8.18 (m, 2H), 7.65 (t,  $J$  = 9.2 Hz, 1H), 7.52 (t,  $J$  = 8.0 Hz, 2H), 7.47–7.43 (m, 1H), 7.04–7.69 (m, 2H), 5.06 (s, 2H), 1.76 (s, 6H); <sup>13</sup>C NMR (100 MHz, CDCl<sub>3</sub>, ppm):  $\delta$  164.5, 162.4 (d, <sup>1</sup>J<sub>CF</sub> = 246.3 Hz), 155.5, 149.8 (d, <sup>3</sup>J<sub>CF</sub> = 10.9 Hz), 133.8, 131.0 (d, <sup>3</sup>J<sub>CF</sub> = 9.4 Hz), 130.3 (2C), 129.1, 128.6 (2C), 126.5 (d, <sup>4</sup>J<sub>CF</sub> = 3.5 Hz), 113.0 (d, <sup>2</sup>J<sub>CF</sub> = 20.9 Hz), 110.6 (d, <sup>2</sup>J<sub>CF</sub> = 24.3 Hz), 70.2, 21.7, 15.6; HRMS (EI):  $m/z$  [M<sup>+</sup>] calcd. for C<sub>17</sub>H<sub>16</sub>NO<sub>3</sub>F: 301.1114, found 301.1119.

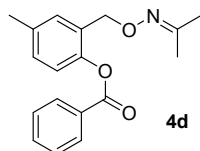

**4-methyl-2-(((propan-2-ylideneamino)oxy)methyl)phenyl benzoate (4d):** yellow solid, 222.8 mg (74%); m.p. 36–38 °C; IR (cm<sup>-1</sup>)  $\bar{\nu}$  2920, 2858, 1734, 1498, 1450, 1262, 1194, 1059, 1024, 871, 705; <sup>1</sup>H NMR (400 MHz, CDCl<sub>3</sub>, ppm):  $\delta$  8.24–8.19 (m, 2H), 7.63 (t,  $J$  = 7.2 Hz, 1H), 7.51 (q,  $J$  = 7.6 Hz, 2H), 7.29 (s, 1H), 7.20–7.17 (m, 1H), 7.10 (d,  $J$  = 8.0 Hz, 1H), 5.08 (s, 2H), 2.38 (s, 3H), 1.77 (s, 6H); <sup>13</sup>C NMR (100 MHz, CDCl<sub>3</sub>, ppm):  $\delta$  165.1, 155.3, 147.0, 135.7, 133.5, 130.6, 130.2

(2C), 129.9, 129.6, 129.5, 128.5 (2C), 122.3, 70.9, 21.8, 21.0, 15.6; HRMS (EI):  $m/z$  [ $M^+$ ] calcd. for  $C_{18}H_{19}NO_3$ : 297.1368, found 297.1368.

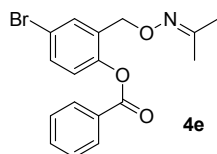

**4-bromo-2-(((propan-2-ylideneamino)oxy)methyl)phenyl benzoate (4e)**: yellow oil, 246.9 mg (68%); IR ( $cm^{-1}$ )  $\bar{\nu}$  3066, 2923, 2853, 1738, 1478, 1363, 1261, 1170, 1055, 1023, 877, 705;  $^1H$  NMR (400 MHz,  $CDCl_3$ , ppm):  $\delta$  8.19 (d,  $J = 7.6$  Hz, 2H), 7.67–7.60 (m, 2H), 7.53–7.46 (m, 3H), 7.11 (d,  $J = 8.8$  Hz, 1H), 5.06 (s, 2H), 1.80 (s, 3H), 1.77 (s, 3H);  $^{13}C$  NMR (100 MHz,  $CDCl_3$ , ppm):  $\delta$  164.6, 155.9, 147.9, 133.8, 132.9, 132.5, 131.7, 130.3 (2C), 129.1, 128.6 (2C), 124.3, 119.2, 69.9, 29.7, 21.7, 15.7; HRMS (EI):  $m/z$  [ $M^+$ ] calcd. for  $C_{17}H_{16}NO_3^{81}Br$ : 363.0293, found 363.0300.

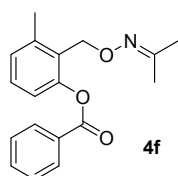

**3-methyl-2-(((propan-2-ylideneamino)oxy)methyl)phenyl benzoate (4f)**: white solid, 235.8 mg (81%); m.p. 96–98 °C; IR ( $cm^{-1}$ )  $\bar{\nu}$  3068, 2956, 2918, 2853, 1729, 1465, 1450, 1267, 1224, 1065, 985, 906, 780, 702;  $^1H$  NMR (400 MHz,  $CDCl_3$ , ppm):  $\delta$  8.22 (d,  $J = 6.8$  Hz, 2H), 7.63 (t,  $J = 7.6$  Hz, 1H), 7.51 (t,  $J = 7.6$  Hz, 2H), 7.29 (t,  $J = 8.0$  Hz, 1H), 7.13 (d,  $J = 7.2$  Hz, 1H), 7.07 (d,  $J = 8.0$  Hz, 1H), 5.12 (s, 2H), 2.48 (s, 3H), 1.73 (s, 3H), 1.70 (s, 3H);  $^{13}C$  NMR (100 MHz,  $CDCl_3$ , ppm):  $\delta$  165.3, 155.0, 150.4, 140.2, 133.5, 130.3 (2C), 129.7, 129.0 (2C), 128.6, 128.1, 128.0, 120.4, 67.1, 21.8, 20.0, 15.4; HRMS (EI):  $m/z$  [ $M^+$ ] calcd. for  $C_{18}H_{19}NO_3$ : 297.1365, found 297.1364.

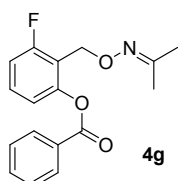

**3-fluoro-2-(((propan-2-ylideneamino)oxy)methyl)phenyl benzoate (4g)**: yellow solid, 189.7 mg (63%); m.p. 93–95 °C; IR ( $cm^{-1}$ )  $\bar{\nu}$  3065, 2990, 2958, 2922, 2852, 1731, 1618, 1468, 1365, 1250, 1070, 996, 922, 867, 786, 703;  $^1H$  NMR (400 MHz,  $CDCl_3$ , ppm):  $\delta$  8.15–8.12 (m, 2H), 7.56 (t,  $J = 7.6$  Hz, 1H), 7.43 (t,  $J = 8.0$  Hz, 2H), 7.32–7.27 (m, 1H), 7.00–6.92 (m, 2H), 5.07 (s, 2H), 1.59 (s, 3H), 1.57 (s, 3H);  $^{13}C$  NMR (100 MHz,  $CDCl_3$ , ppm):  $\delta$  164.8, 161.9 (d,  $^1J_{CF} = 248.0$  Hz), 155.3, 151.1 (d,  $^3J_{CF} = 6.6$  Hz), 133.7, 130.3 (2C), 129.7 (d,  $^3J_{CF} = 10.0$  Hz), 129.4, 128.6 (2C), 118.8 (d,  $^3J_{CF} = 3.5$  Hz), 118.6 (d,  $^2J_{CF} = 17.5$  Hz), 113.1 (d,  $^2J_{CF} = 22.3$  Hz), 63.7, 21.7, 15.4; HRMS (EI):  $m/z$  [ $M^+$ ] calcd. for  $C_{17}H_{16}NO_3F$ : 301.1114, found 301.1117.

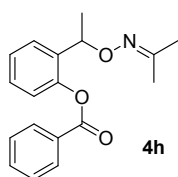

**2-(1-((propan-2-ylideneamino)oxy)ethyl)phenyl benzoate (4h):** yellow oil, 216.8 mg (73%); IR ( $\text{cm}^{-1}$ )  $\bar{\nu}$  3070, 2977, 2928, 1734, 1487, 1449, 1257, 1213, 1061, 936, 751, 705, 670;  $^1\text{H}$  NMR (400 MHz,  $\text{CDCl}_3$ , ppm):  $\delta$  8.22 (d,  $J = 7.6$  Hz, 2H), 7.64 (t,  $J = 7.6$  Hz, 1H), 7.51 (t,  $J = 8.0$  Hz, 2H), 7.47 (dd,  $J_1 = 7.6$  Hz,  $J_2 = 2.0$  Hz, 1H), 7.34 (td,  $J_1 = 7.6$  Hz,  $J_2 = 2.0$  Hz, 1H), 7.29 (dd,  $J_1 = 7.6$  Hz,  $J_2 = 1.2$  Hz, 1H), 7.19 (dd,  $J_1 = 8.0$  Hz,  $J_2 = 1.2$  Hz, 1H), 5.45 (q,  $J = 6.8$  Hz, 1H), 1.83 (s, 3H), 1.76 (s, 3H), 1.51 (d,  $J = 6.8$  Hz, 3H);  $^{13}\text{C}$  NMR (100 MHz,  $\text{CDCl}_3$ , ppm):  $\delta$  165.0, 154.8, 148.0, 135.7, 133.6, 130.3 (2C), 129.6, 128.6 (2C), 128.1, 127.2, 126.1, 122.7, 75.3, 21.8, 21.1, 15.7 ( $\text{C}_{18}\text{H}_{20}\text{NO}_3$ ); HRMS (EI):  $m/z$   $[\text{M}-\text{NO}-\text{C}_3\text{H}_6]^+$  calcd. for  $\text{C}_{15}\text{H}_{14}\text{O}_2$ : 226.0994, found 226.0967.

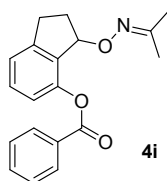

**3-((propan-2-ylideneamino)oxy)-2,3-dihydro-1H-inden-4-yl benzoate (4i):** yellow solid, 219.5 mg (71%); m.p. 85–87 °C; IR ( $\text{cm}^{-1}$ )  $\bar{\nu}$  3061, 2921, 2851, 1736, 1469, 1450, 1263, 1226, 1170, 1065, 1024, 705;  $^1\text{H}$  NMR (400 MHz,  $\text{CDCl}_3$ , ppm):  $\delta$  8.20 (d,  $J = 7.6$  Hz, 2H), 7.61 (t,  $J = 7.2$  Hz, 1H), 7.49 (t,  $J = 7.6$  Hz, 2H), 7.34 (t,  $J = 8.0$  Hz, 1H), 7.18 (d,  $J = 7.6$  Hz, 1H), 7.07 (d,  $J = 8.0$  Hz, 1H), 5.79–5.76 (m, 1H), 3.19–3.11 (m, 1H), 2.93–2.85 (m, 1H), 2.52–2.42 (m, 1H), 2.27–2.18 (m, 1H), 1.55 (s, 6H);  $^{13}\text{C}$  NMR (100 MHz,  $\text{CDCl}_3$ , ppm):  $\delta$  164.7, 154.4, 148.4, 147.3, 134.1, 133.2, 130.3 (2C), 130.0, 129.9, 128.4 (2C), 122.5, 120.2, 84.6, 32.3, 30.5, 21.5, 15.4; HRMS (EI):  $m/z$   $[\text{M}^+]$  calcd. for  $\text{C}_{19}\text{H}_{19}\text{NO}_3$ : 309.1365, found 309.1367.

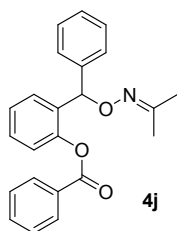

**2-(phenyl((propan-2-ylideneamino)oxy)methyl)phenyl benzoate (4j):** yellow oil, 214.9 mg (71%); IR ( $\text{cm}^{-1}$ )  $\bar{\nu}$  3065, 3028, 2910, 1735, 1484, 1450, 1258, 1210, 1170, 1059, 1023, 927, 753, 699;  $^1\text{H}$  NMR (400 MHz,  $\text{CDCl}_3$ , ppm):  $\delta$  8.07 (d,  $J = 7.2$  Hz, 2H), 7.60 (t,  $J = 7.2$  Hz, 1H), 7.46 (t,  $J = 8.0$  Hz, 2H), 7.40–7.34 (m, 3H), 7.28–7.26 (m, 1H), 7.25–7.20 (m, 4H), 6.42 (s, 1H), 1.86 (s, 3H), 1.71 (s, 3H);  $^{13}\text{C}$  NMR (100 MHz,  $\text{CDCl}_3$ , ppm):  $\delta$  164.7, 155.6, 148.7, 140.5, 133.9, 133.5, 130.3 (2C), 129.5, 128.7, 128.6, 128.4 (2C), 128.2 (2C), 127.5, 127.5 (2C), 125.9, 123.0, 81.4, 21.8, 16.0 ( $\text{C}_{23}\text{H}_{22}\text{NO}_3$ ); HRMS (EI):  $m/z$   $[\text{M}-\text{NO}-\text{C}_3\text{H}_6]^+$  calcd. for  $\text{C}_{20}\text{H}_{16}\text{O}_2$ : 288.1150, found 288.1114.

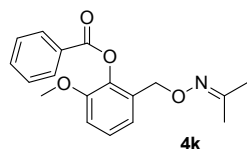

**2-methoxy-6-(((propan-2-ylideneamino)oxy)methyl)phenyl benzoate (4k):** yellow oil, 279.8 mg (84%); IR ( $\text{cm}^{-1}$ )  $\bar{\nu}$  3063, 2919, 2851, 1734, 1497, 1450, 1262, 1174, 1060, 1031, 878, 706;  $^1\text{H}$  NMR (400 MHz,  $\text{CDCl}_3$ , ppm):  $\delta$  8.20 (d,  $J = 7.2$  Hz, 2H), 7.63 (t,  $J = 7.6$  Hz, 1H), 7.50 (t,  $J = 7.6$  Hz, 2H), 7.13 (d,  $J = 8.8$  Hz, 1H), 7.02 (d,  $J_1 = 3.2$  Hz, 1H), 6.89 (dd,  $J_1 = 8.8$  Hz,  $J_2 = 3.2$  Hz, 1H),

5.07 (s, 2H), 3.83 (s, 3H), 1.79 (s, 3H), 1.77 (s, 3H);  $^{13}\text{C}$  NMR (100 MHz,  $\text{CDCl}_3$ , ppm):  $\delta$  172.7, 155.3, 149.0, 130.3, 129.9, 128.8, 125.9, 122.4, 70.5, 27.6, 21.8, 15.6, 9.1; HRMS (EI):  $m/z$  [ $\text{M}^+$ ] calcd. for  $\text{C}_{18}\text{H}_{19}\text{NO}_4$ : 333.1314, found 333.1313.

## 2.5 Investigation on the substrate scope of extended aralkylalcohols (Scheme 5)

**General procedure:** A mixture of substrate **1** (1.0 mmol), **2** (2.0 mmol),  $\text{Pd}(\text{OAc})_2$  (0.10 mmol) and  $\text{K}_2\text{S}_2\text{O}_8$  (3.0 mmol) was dissolved in  $\text{CH}_3\text{CN}$  (6 mL), then the reaction mixture was heated at 80 °C for 10 h. Upon completion of the reaction, the mixture was dropped into the saturated  $\text{NaHCO}_3$  solution (30 mL). The solution was extracted with ethyl acetate (25 mL $\times$ 3), and then the combined organic layers were dried over anhydrous  $\text{MgSO}_4$ . Finally, the solution was concentrated *in vacuo* to provide a crude product, which was purified *via* a column chromatography on silica gel (eluent: petroleum ether/ethyl acetate 20:1) to supply the desired product **5**.

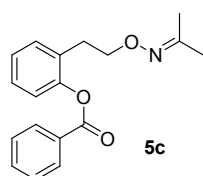

**2-(2-((propan-2-ylideneamino)oxy)ethyl)phenyl benzoate (5c):** yellow oil, 204.9 mg (69%); IR ( $\text{cm}^{-1}$ )  $\bar{\nu}$  2972, 2930, 2877, 1655, 1451, 1365, 1263, 1215, 1171, 1063, 831, 753;  $^1\text{H}$  NMR (400 MHz,  $\text{CDCl}_3$ , ppm):  $\delta$  8.25 (d,  $J = 6.8$  Hz, 2H), 7.65 (t,  $J = 7.6$  Hz, 1H), 7.52 (t,  $J = 8.0$  Hz, 2H), 7.35 (dd,  $J_1 = 7.6$  Hz,  $J_2 = 1.6$  Hz, 1H), 7.30 (dt,  $J_1 = 7.6$  Hz,  $J_2 = 1.6$  Hz, 1H), 7.23 (dd,  $J_1 = 7.2$  Hz,  $J_2 = 1.2$  Hz, 1H), 7.18 (dd,  $J_1 = 8.0$  Hz,  $J_2 = 1.2$  Hz, 1H), 4.24 (dt,  $J_1 = 6.8$  Hz,  $J_2 = 2.4$  Hz, 2H), 2.96 (t,  $J = 7.2$  Hz, 2H), 1.79 (s, 3H), 1.77 (s, 3H);  $^{13}\text{C}$  NMR (100 MHz,  $\text{CDCl}_3$ , ppm):  $\delta$  165.1, 155.0, 149.5, 133.6, 131.1, 131.0, 130.3 (2C), 129.6, 128.6 (2C), 127.5, 126.1, 122.4, 72.6, 30.3, 21.8, 15.7; HRMS (EI):  $m/z$  [ $\text{M}^+$ ] calcd. for  $\text{C}_{18}\text{H}_{19}\text{NO}_3$ : 297.1365, found 297.1367.

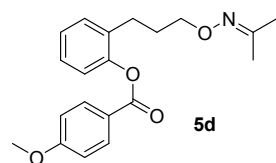

**2-(3-((propan-2-ylideneamino)oxy)propyl)phenyl 4-methoxybenzoate (5d):** yellow oil, 143.3 mg (42%); IR ( $\text{cm}^{-1}$ )  $\bar{\nu}$  3209, 2921, 2853, 1728, 1605, 1510, 1456, 1252, 1162, 1068, 1017, 846, 763;  $^1\text{H}$  NMR (400 MHz,  $\text{CDCl}_3$ , ppm):  $\delta$  8.17 (d,  $J = 9.2$  Hz, 2H), 7.30 (dd,  $J_1 = 7.2$  Hz,  $J_2 = 1.6$  Hz, 1H), 7.22 (td,  $J_1 = 8.8$  Hz,  $J_2 = 1.6$  Hz, 2H), 7.13 (dd,  $J_1 = 8.0$  Hz,  $J_2 = 1.2$  Hz, 1H), 6.99 (d,  $J = 9.2$  Hz, 2H), 4.01 (t,  $J = 6.4$  Hz, 2H), 3.90 (s, 3H), 2.67 (t,  $J = 7.6$  Hz, 2H), 1.94 (t,  $J = 8.0$  Hz, 2H), 1.80 (s, 3H), 1.71 (s, 3H);  $^{13}\text{C}$  NMR (100 MHz,  $\text{CDCl}_3$ , ppm):  $\delta$  164.7, 163.8, 154.4, 149.2, 134.0, 132.2 (2C), 130.3, 127.0, 125.9, 122.4, 121.8, 113.8 (2C), 72.4, 55.4, 29.6, 26.8, 21.7, 15.3; HRMS (EI):  $m/z$  [ $\text{M}^+$ ] calcd. for  $\text{C}_{20}\text{H}_{23}\text{NO}_4$ : 341.1627, found 341.1605.

### 3. Selectively removal of the acetoxime directing group (Scheme 6)

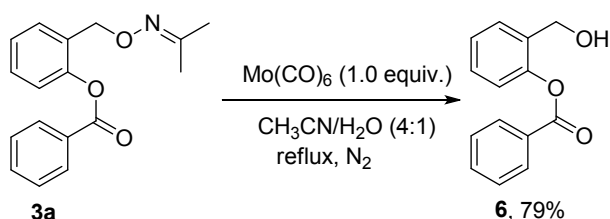

**Procedure:** To a mixture of compound **3a** (141.5mg, 0.5 mmol) in acetonitrile (4.0 mL) containing water (1.0 mL), molybdenum hexacarbonyl (132.0 mg, 0.5 mmol) was added. The flask was evacuated and backfilled with N<sub>2</sub> three times and then heated at reflux. The reaction was monitored by TLC (silica gel, eluent: EtOAc/hexanes = 1:5). On completion of the reaction, silica gel (0.3 g) was added to the cooled mixture. After removal of the solvent *in vacuo*, the residue was purified by flash column chromatography on silica gel (eluent: petroleum ether/ethyl acetate 20:1) to give the corresponding product **6**.

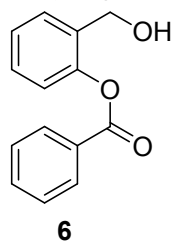

**2-(hydroxymethyl)phenyl benzoate (6):** white solid, 90.1 mg (79%); m.p. 71–73 °C; IR (cm<sup>-1</sup>)  $\bar{\nu}$  3338, 3064, 3036, 2957, 1685, 1598, 1455, 1373, 1273, 1180, 1107, 869, 749, 707; <sup>1</sup>H NMR (400 MHz, CDCl<sub>3</sub>, ppm):  $\delta$  8.13 (s, 1H), 8.07 (d,  $J = 7.2$  Hz, 2H), 7.58 (t,  $J = 7.2$  Hz, 1H), 7.44 (t,  $J = 7.6$  Hz, 2H), 7.37 (dd,  $J_1 = 1.2$  Hz,  $J_2 = 7.6$  Hz, 1H), 7.30 (t,  $J = 8.4$  Hz, 1H), 6.98 (d,  $J = 8.0$  Hz, 1H), 6.93 (t,  $J = 7.6$  Hz, 1H), 5.38 (s, 2H); <sup>13</sup>C NMR (100 MHz, CDCl<sub>3</sub>, ppm):  $\delta$  168.8, 155.6, 133.6, 132.3, 131.2, 130.0 (2C), 129.2, 128.5 (2C), 121.7, 120.6, 117.8, 63.7; HRMS (EI):  $m/z$  [M<sup>+</sup>] calcd. for C<sub>14</sub>H<sub>12</sub>O<sub>3</sub>: 228.0786, found 228.0785.

#### 4. Kinetic isotope effect experiment (Scheme 7)

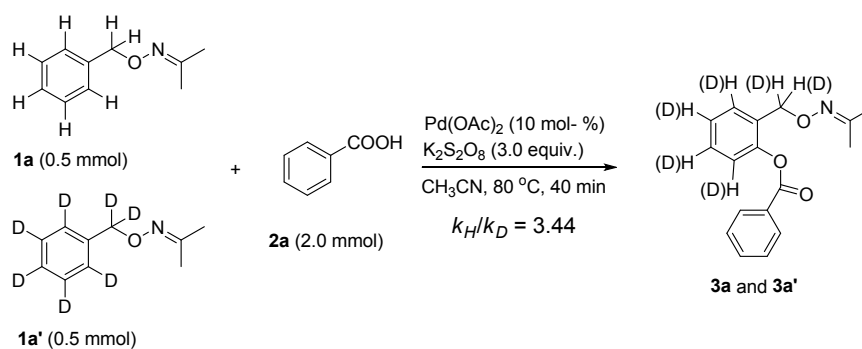

**Procedure:** A mixture of substrate **1a** (0.5 mmol), **1a'**- *d*<sub>7</sub> (0.5 mmol), Pd(OAc)<sub>2</sub> (0.1 mmol) and K<sub>2</sub>S<sub>2</sub>O<sub>8</sub> (3.0 mmol) was dissolved in CH<sub>3</sub>CN (6 mL), then the reaction mixture was heated at 80 °C for 40 min. Upon completion of the reaction, the mixture was dropped into the saturated NaHCO<sub>3</sub> solution (30 mL). The solution was extracted with ethyl acetate (25 mL×3), and then combined organic layers were dried over anhydrous MgSO<sub>4</sub>. Finally, the solution was concentrated *in vacuo* to provide a crude product, which was purified *via* a column chromatography on silica gel (eluent: petroleum ether/ethyl acetate 20:1) to supply the desired product. The product distribution ( $k_H/k_D = 3.44$ ) was analyzed by <sup>1</sup>H NMR.

## 5. All Copies of Spectra

### 5.1 Copies of the spectra for Scheme 3

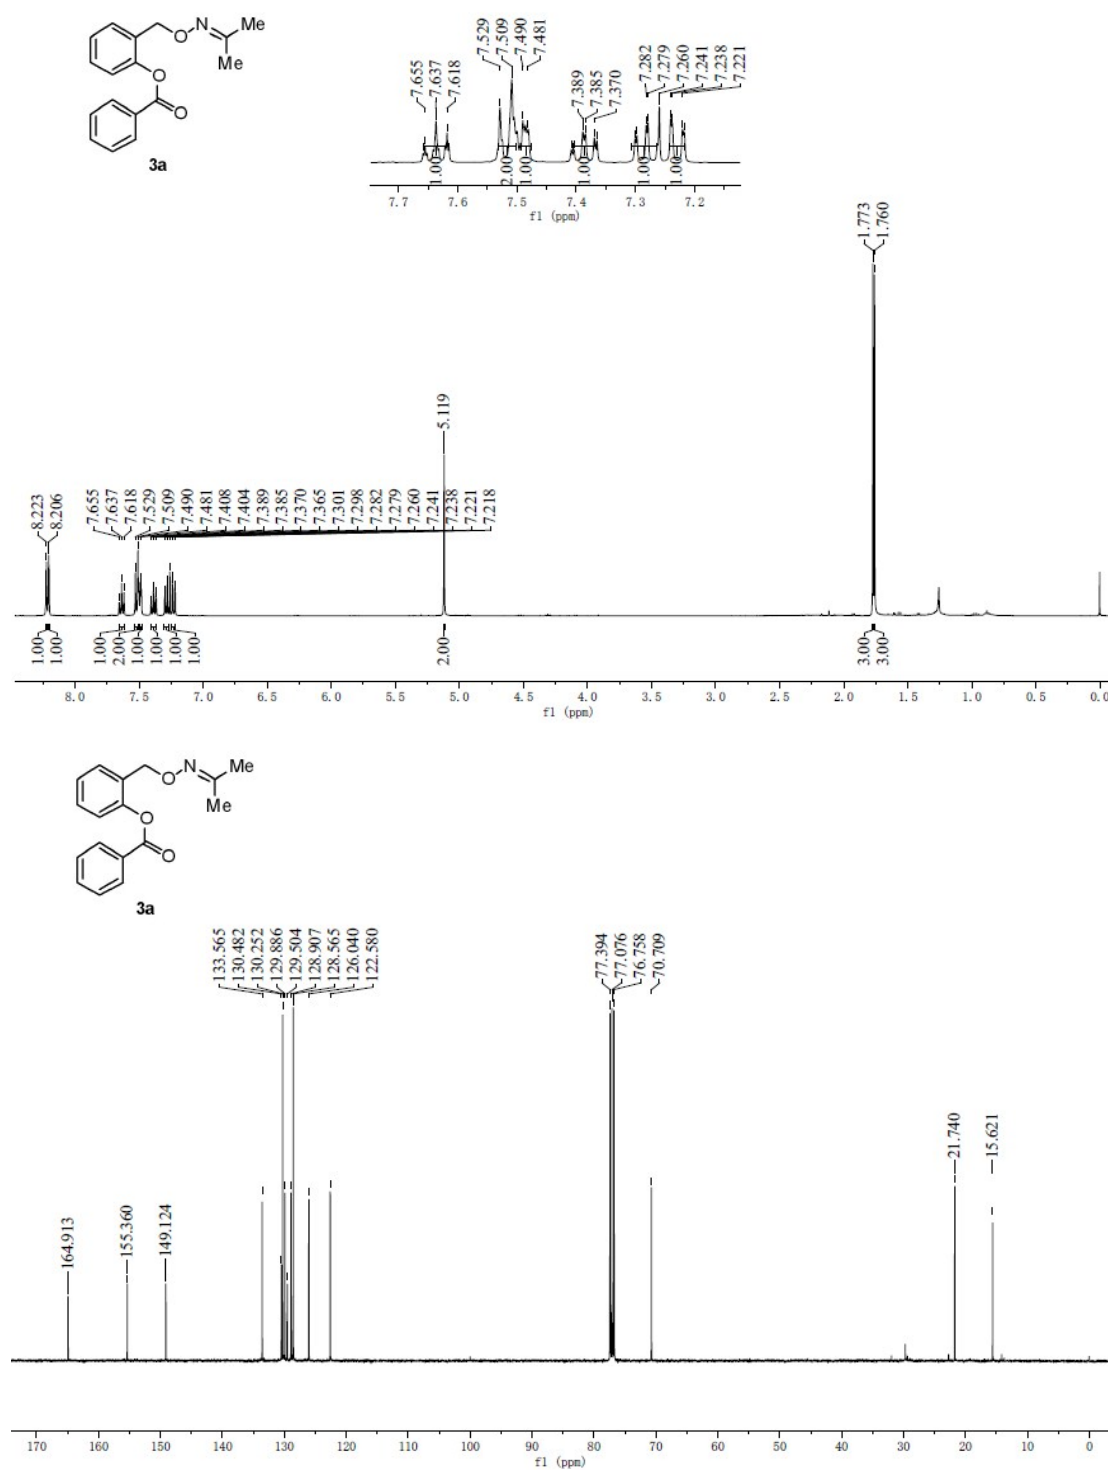

## Elemental Composition Report

### Single Mass Analysis

Tolerance = 5.0 mDa / DBE: min = -1.5, max = 50.0

Element prediction: Off

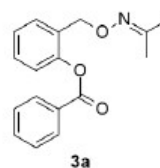

### Monoisotopic Mass, Odd and Even Electron Ions

1392 formula(e) evaluated with 89 results within limits (all results (up to 1000) for each mass)

Elements Used:

C: 0-17 H: 0-17 N: 0-1 O: 0-3

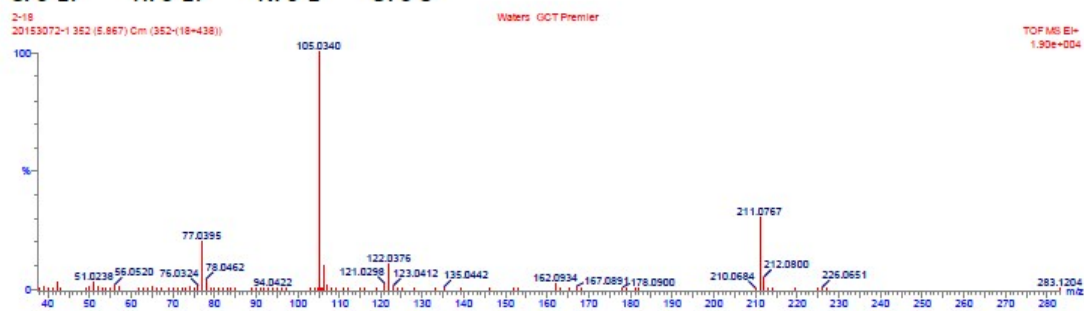

Minimum: 0.10  
Maximum: 100.00

| Mass     | RA   | Calc. Mass | mDa  | PPM  | DBE  | i-FIT     | Formula      |
|----------|------|------------|------|------|------|-----------|--------------|
| 283.1204 | 0.11 | 283.1208   | -0.4 | -1.4 | 10.0 | 5546028.0 | C17 H17 N O3 |

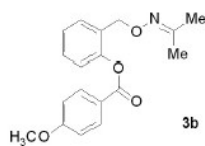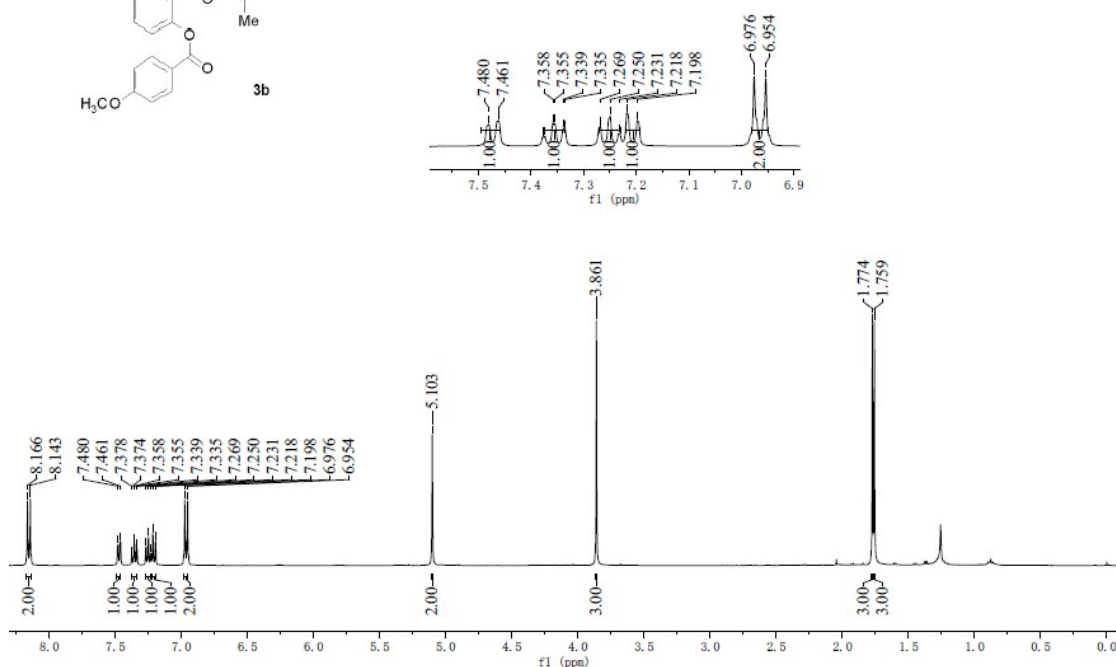



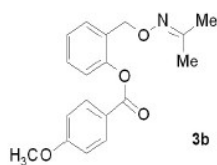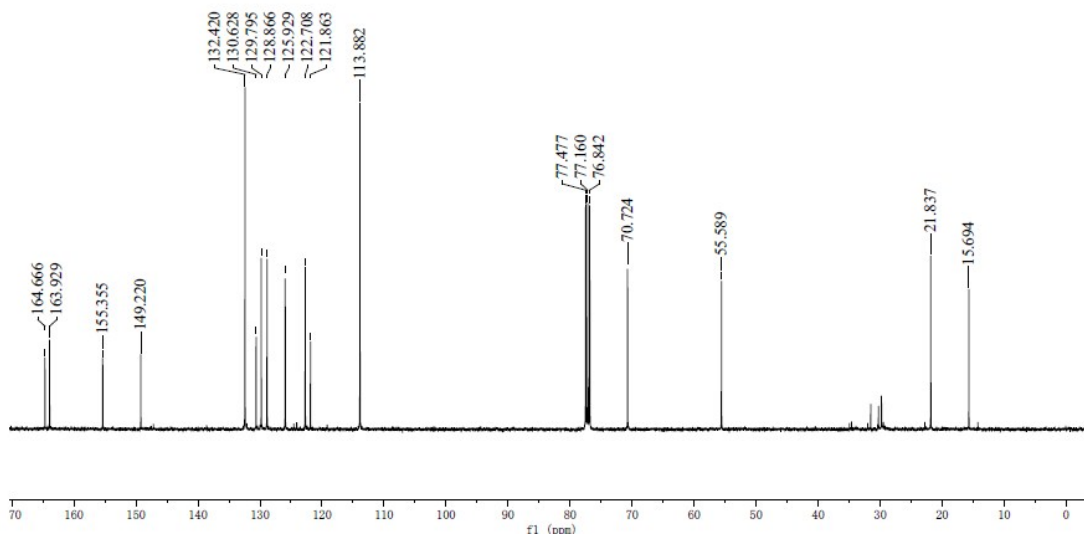

### Elemental Composition Report

#### Single Mass Analysis

Tolerance = 5.0 mDa / DBE: min = -1.5, max = 50.0

Element prediction: Off

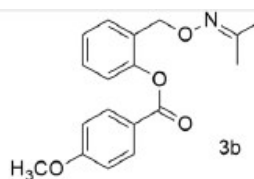

Monoisotopic Mass, Odd and Even Electron Ions

8 formula(e) evaluated with 1 results within limits (all results (up to 1000) for each mass)

Elements Used:

C: 0-18 H: 0-19 N: 0-1 O: 0-4

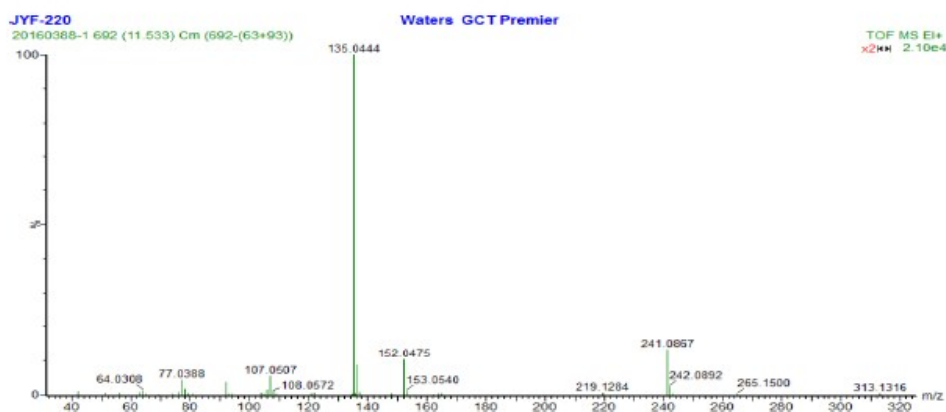

Minimum: -1.5  
Maximum: 5.0 10.0 50.0

| Mass     | Calc. Mass | mDa | PPM | DBE  | i-FIT | Formula      |
|----------|------------|-----|-----|------|-------|--------------|
| 313.1316 | 313.1314   | 0.2 | 0.6 | 10.0 | n/a   | C18 H19 N O4 |

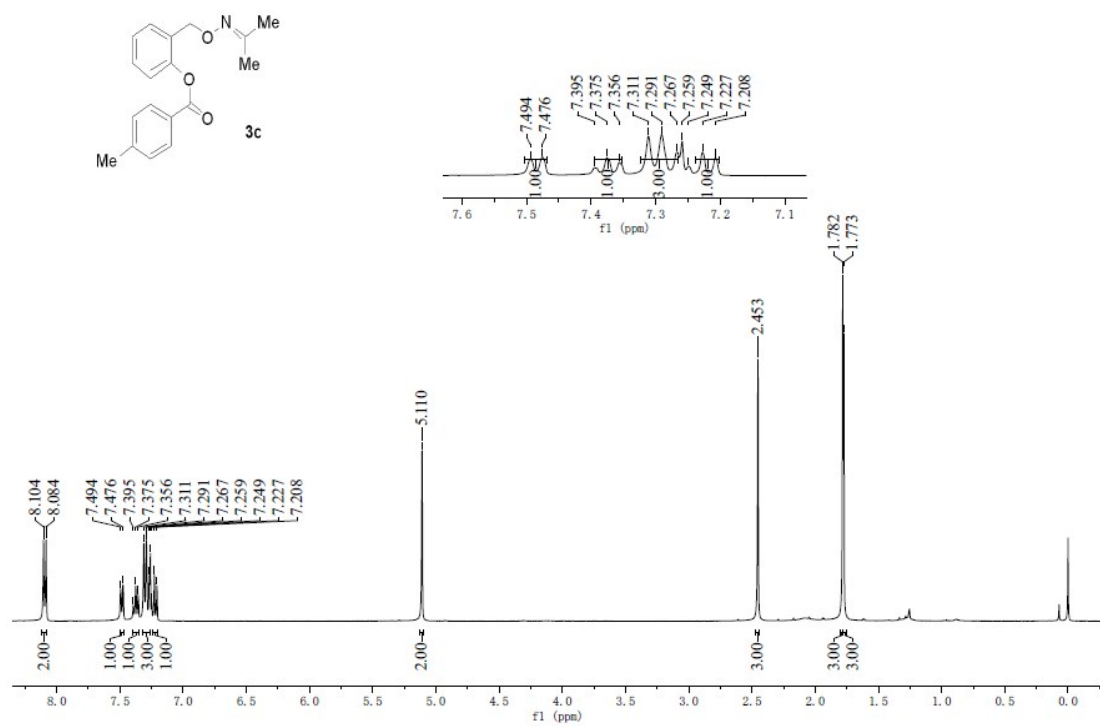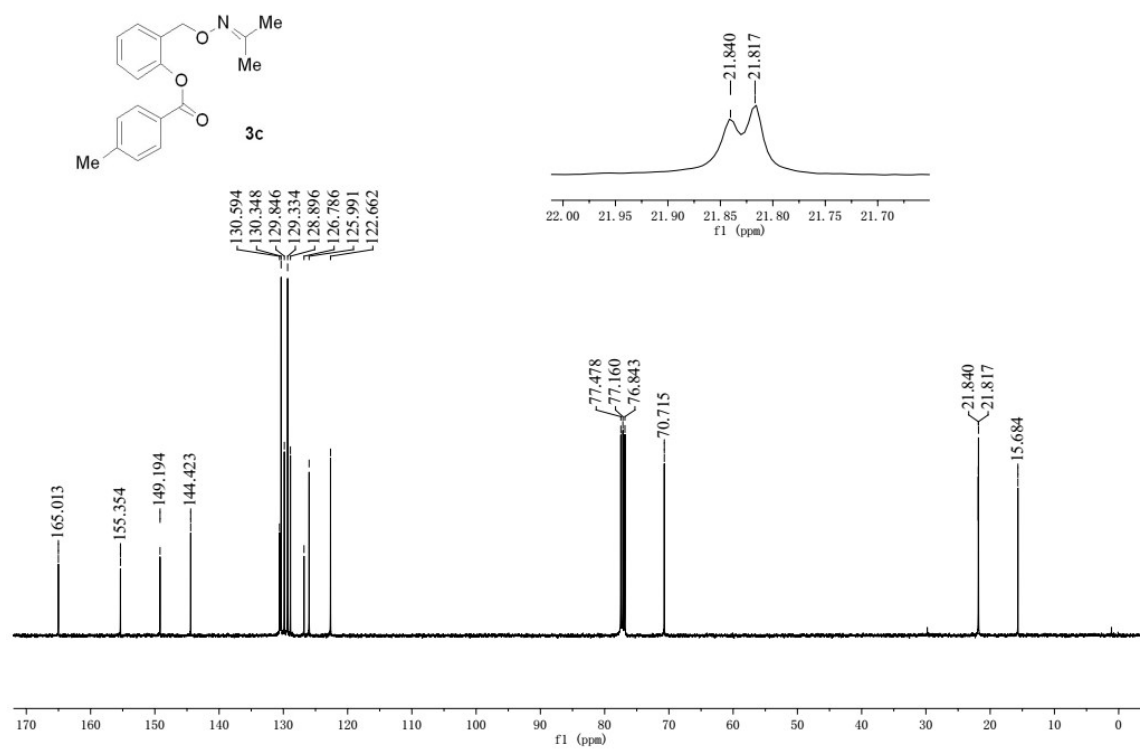

## Elemental Composition Report

### Single Mass Analysis

Tolerance = 5.0 mDa / DBE: min = -1.5, max = 50.0

Element prediction: Off

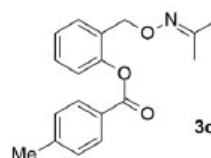

### Monoisotopic Mass, Odd and Even Electron Ions

838 formula(e) evaluated with 34 results within limits (all results (up to 1000) for each mass)

Elements Used:

C: 0-18 H: 0-19 N: 0-1 O: 0-3

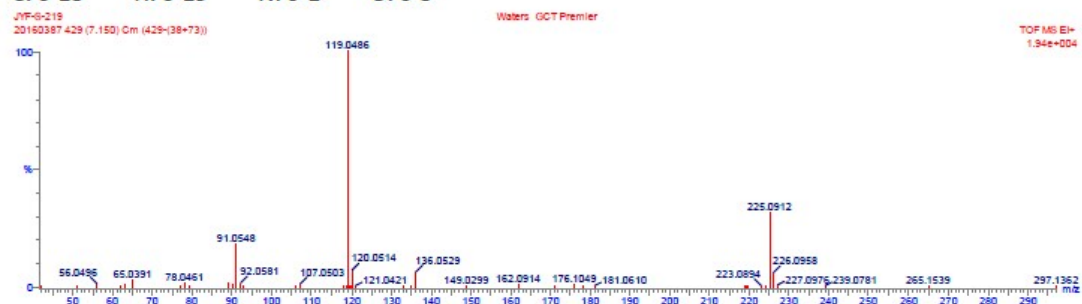

Minimum: 0.10  
Maximum: 100.00

5.0 10.0

-1.5 50.0

| Mass     | RA   | Calc. Mass | mDa  | PPM  | DBE  | i-FIT     | Formula      |
|----------|------|------------|------|------|------|-----------|--------------|
| 297.1362 | 0.11 | 297.1365   | -0.3 | -1.0 | 10.0 | 5546028.5 | C18 H19 N O3 |

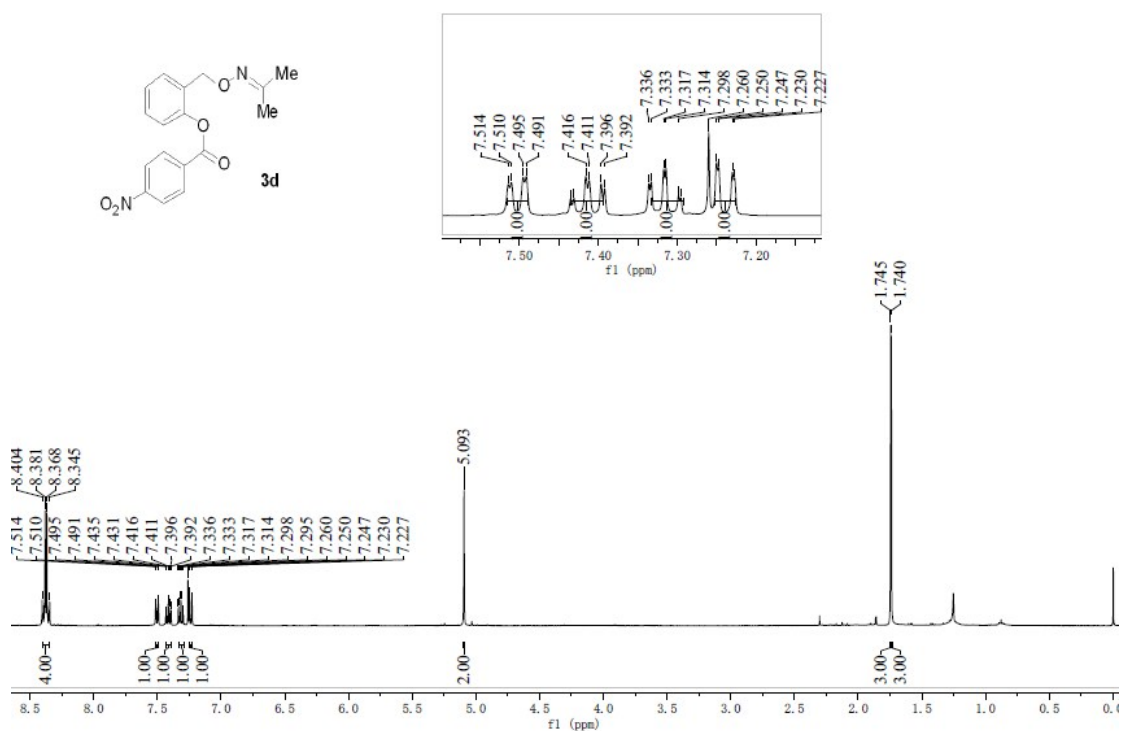

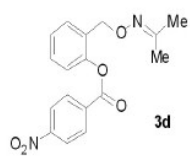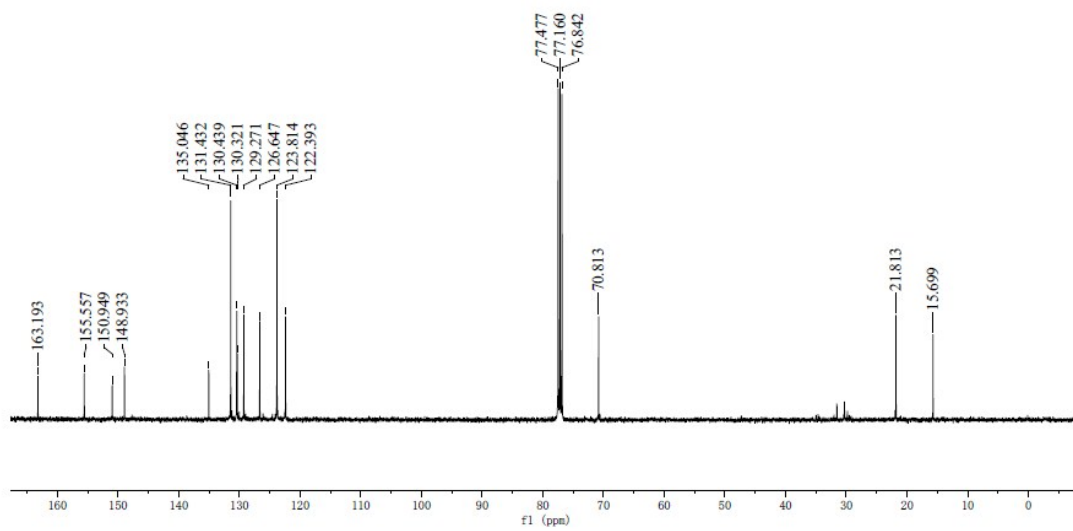

## Elemental Composition Report

### Single Mass Analysis

Tolerance = 5.0 mDa / DBE: min = -1.5, max = 50.0

Element prediction: Off

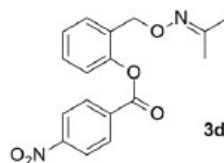

### Monoisotopic Mass, Odd and Even Electron Ions

1947 formula(e) evaluated with 103 results within limits (all results (up to 1000) for each mass)

Elements Used:

C: 0-17 H: 0-16 N: 0-2 O: 0-5

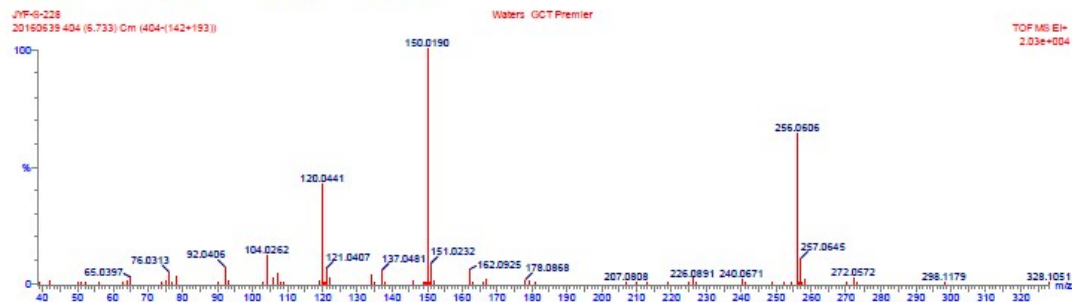

Minimum: 0.11  
Maximum: 100.00 5.0 10.0 -1.5 50.0

| Mass     | RA   | Calc. Mass | mDa  | PPM  | DBE  | i-FIT     | Formula       |
|----------|------|------------|------|------|------|-----------|---------------|
| 328.1051 | 0.12 | 328.1059   | -0.8 | -2.4 | 11.0 | 5546028.5 | C17 H16 N2 O5 |

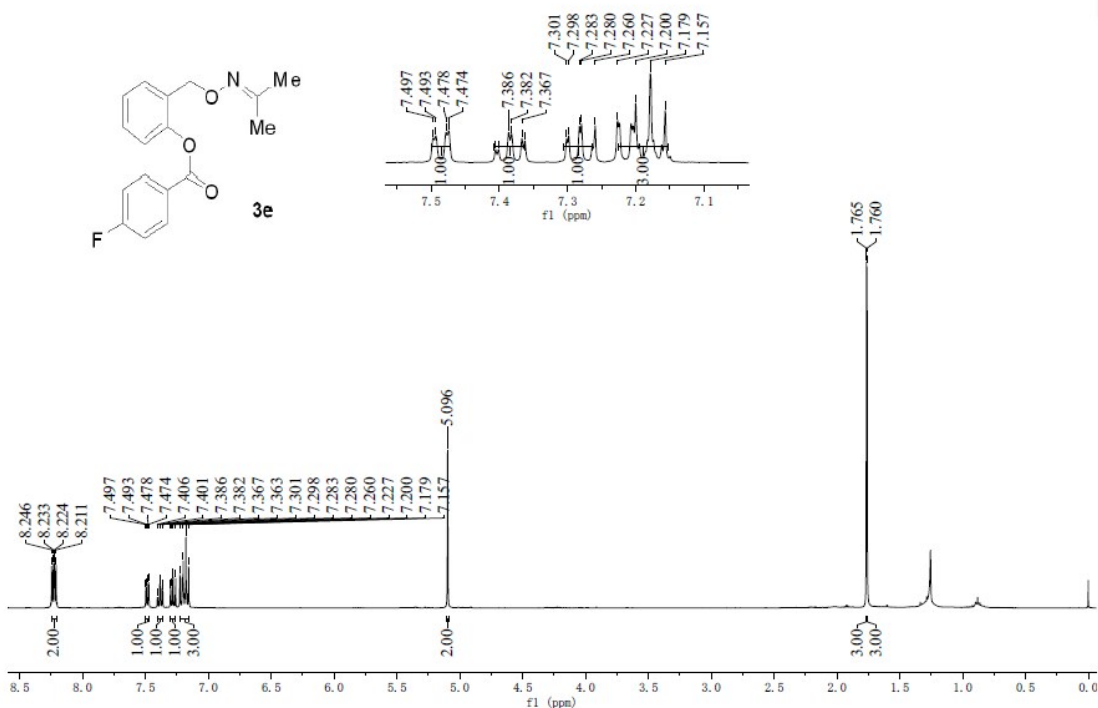

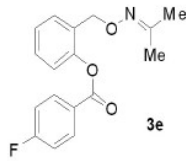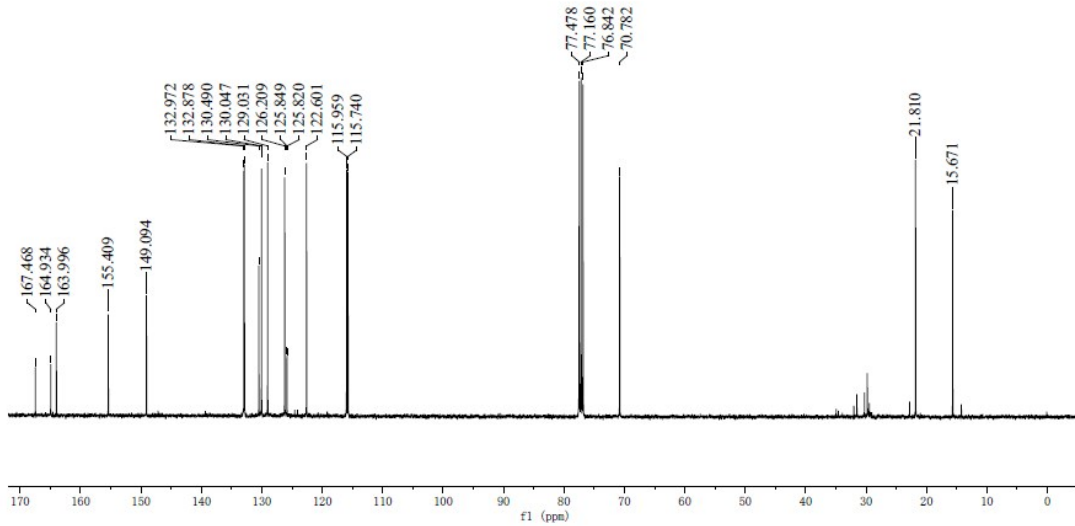

### Elemental Composition Report

#### Single Mass Analysis

Tolerance = 5.0 mDa / DBE: min = -1.5, max = 50.0

Element prediction: Off

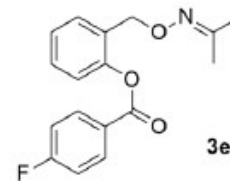

#### Monoisotopic Mass, Odd and Even Electron Ions

13 formula(e) evaluated with 1 results within limits (all results (up to 1000) for each mass)

Elements Used:

C: 0-17 H: 0-16 N: 0-1 O: 0-3 F: 0-1

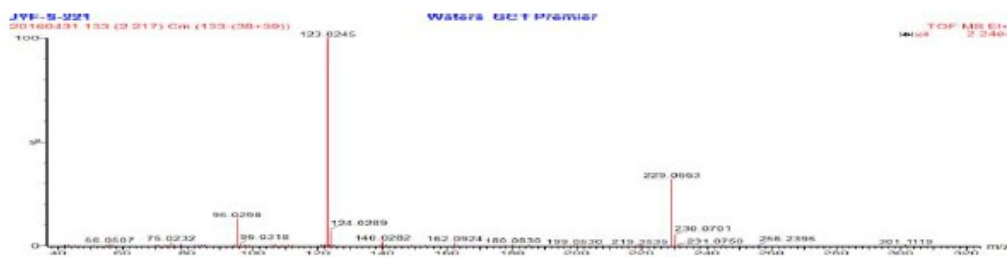

Minimum:

Maximum:

| Mass     | Calc. Mass | mDa | PPM | DBE  | i-FIT | Formula    |
|----------|------------|-----|-----|------|-------|------------|
| 301.1119 | 301.1114   | 0.5 | 1.7 | 10.0 | n/a   | C17H16N03F |

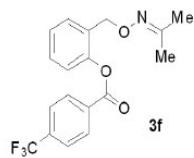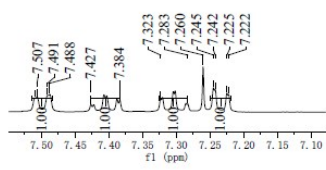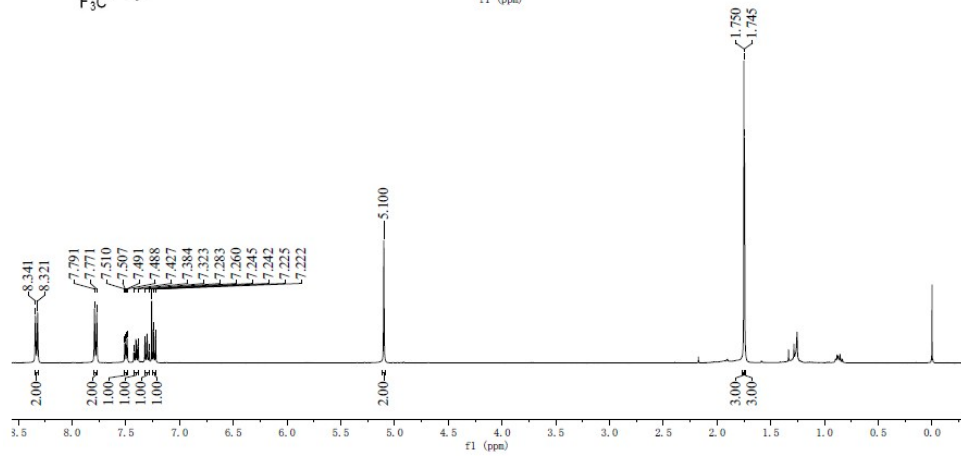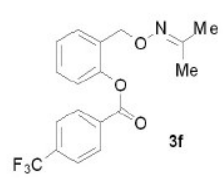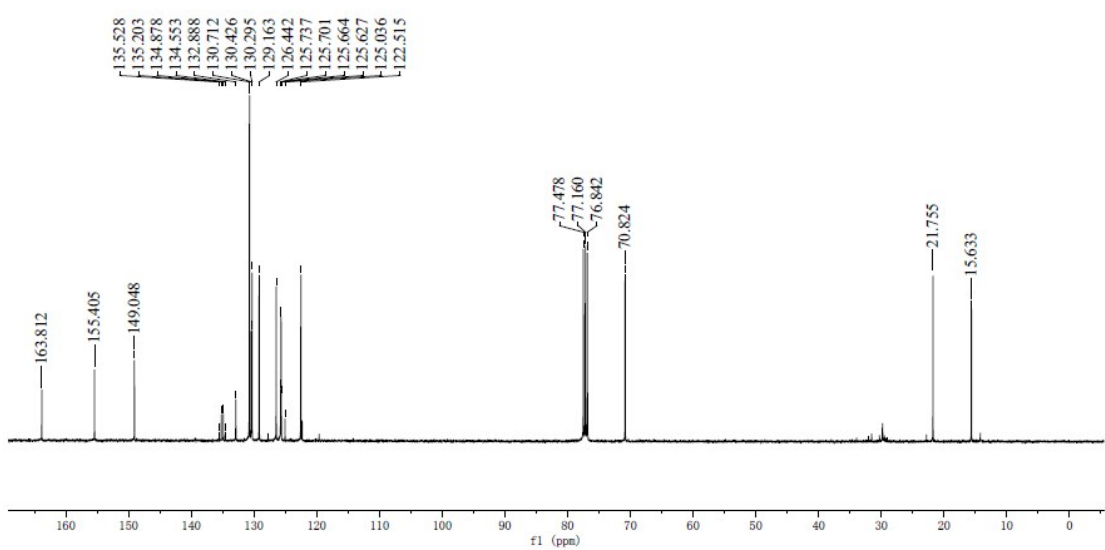



## Elemental Composition Report

### Single Mass Analysis

Tolerance = 5.0 mDa / DBE: min = -1.5, max = 50.0

Element prediction: Off

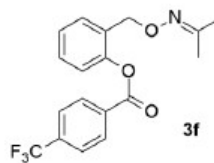

Monoisotopic Mass, Odd and Even Electron Ions

254 formula(e) evaluated with 17 results within limits (all results (up to 1000) for each mass)

Elements Used:

C: 0-18 H: 0-16 N: 0-1 O: 0-3 F: 0-3

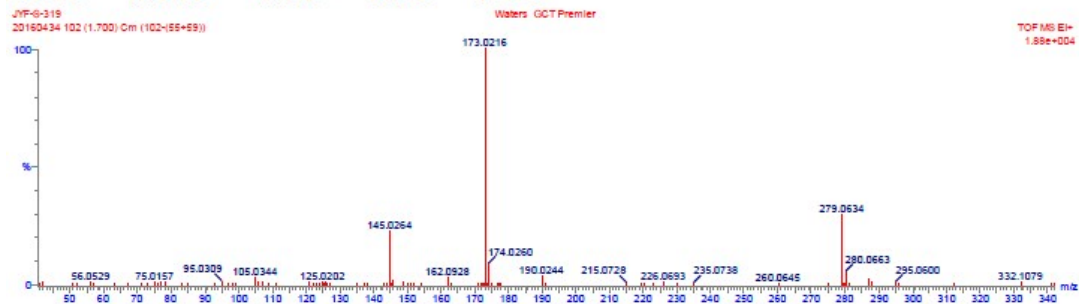

Minimum: 3.00  
Maximum: 100.00

| Mass     | RA    | Calc. Mass | mDa | PPM | DBE | i-FIT | Formula       |
|----------|-------|------------|-----|-----|-----|-------|---------------|
| 279.0634 | 29.77 | 279.0633   | 0.1 | 0.4 | 9.5 | 0.1   | C15 H10 O2 F3 |

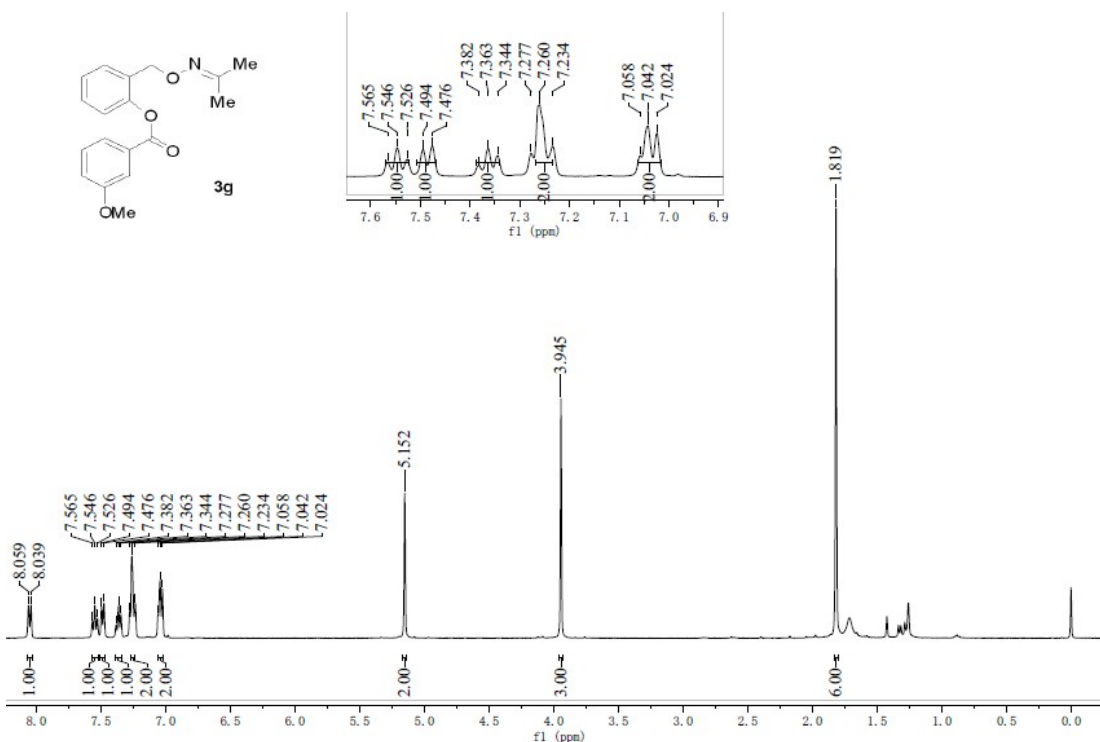



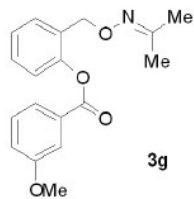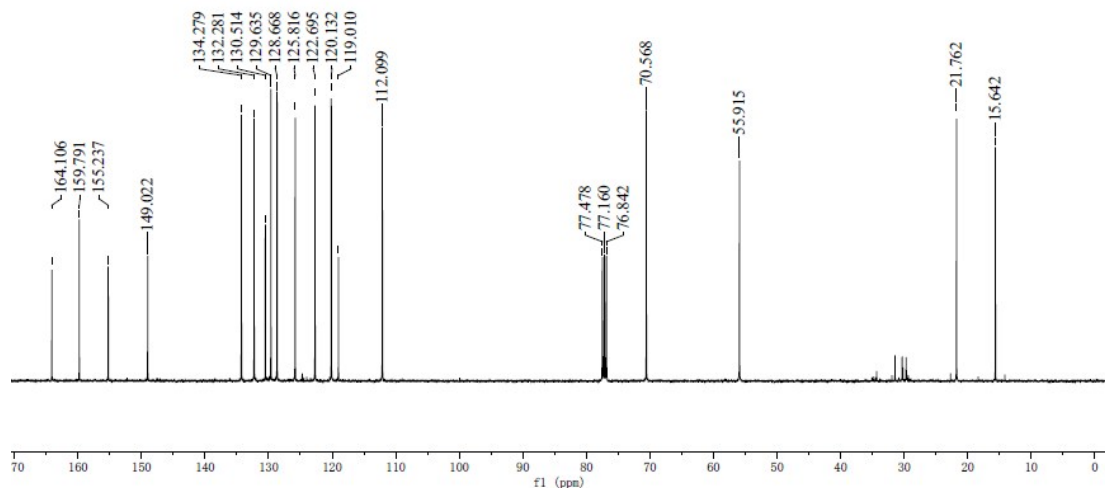

### Elemental Composition Report

#### Single Mass Analysis

Tolerance = 5.0 mDa / DBE: min = -1.5, max = 50.0

Element prediction: Off

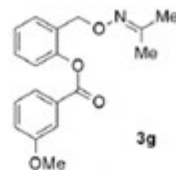

Monoisotopic Mass, Odd and Even Electron Ions

781 formula(e) evaluated with 49 results within limits (all results (up to 1000) for each mass)

Elements Used:

C: 0-18 H: 0-19 N: 0-1 O: 0-4

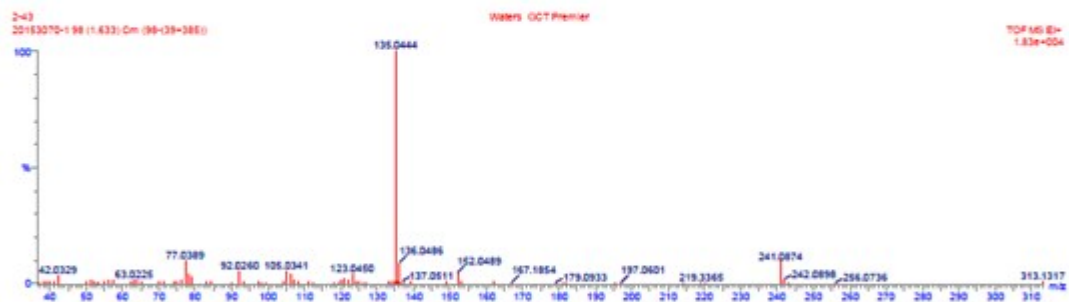

Minimum: 0.22  
Maximum: 100.00

| Mass     | RA   | Calc. Mass | mDa | PPM | DBE  | i-FIT     | Formula      |
|----------|------|------------|-----|-----|------|-----------|--------------|
| 313.1317 | 0.23 | 313.1314   | 0.3 | 1.0 | 10.0 | 5546035.5 | C18 H19 N O4 |

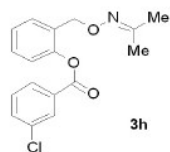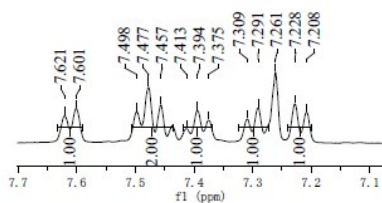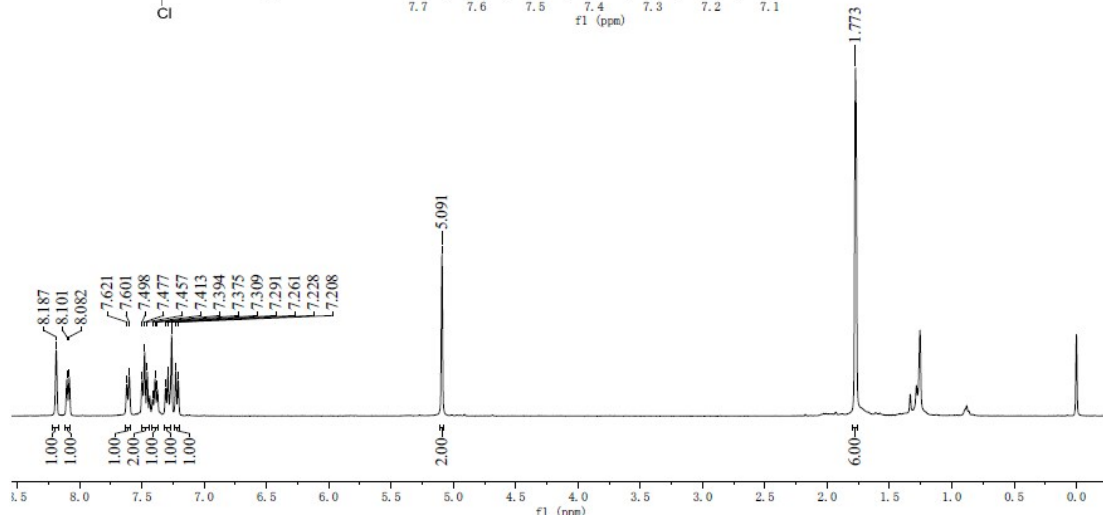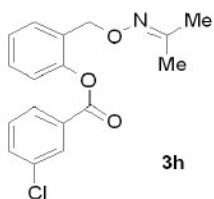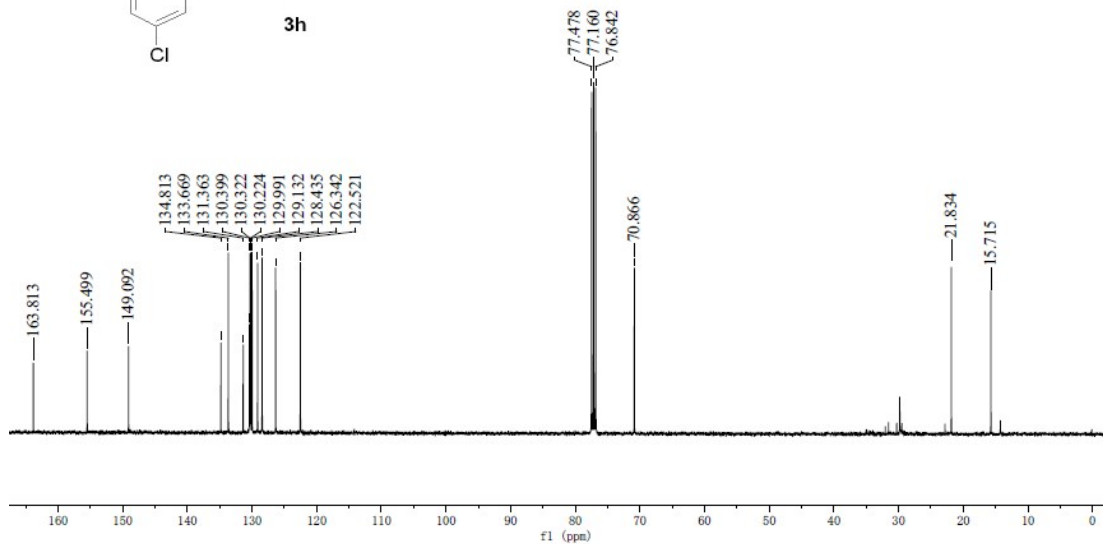

## Elemental Composition Report

### Single Mass Analysis

Tolerance = 5.0 mDa / DBE: min = -1.5, max = 50.0

Element prediction: Off

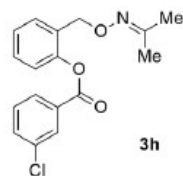

Monoisotopic Mass, Odd and Even Electron Ions

462 formula(e) evaluated with 29 results within limits (all results (up to 1000) for each mass)

Elements Used:

C: 0-17 H: 0-16 N: 0-1 O: 0-3 35Cl: 0-1 37Cl: 0-1

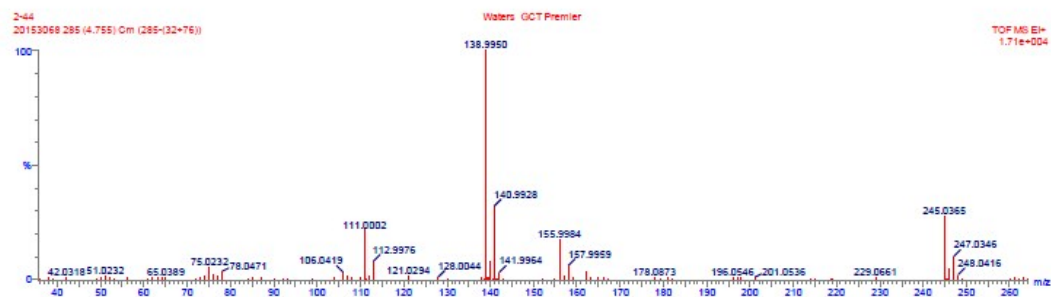

Minimum: 3.00  
Maximum: 100.00

-1.5  
5.0 10.0 50.0

| Mass     | RA    | Calc. Mass | mDa  | PPM  | DBE | i-FIT | Formula         |
|----------|-------|------------|------|------|-----|-------|-----------------|
| 245.0365 | 27.44 | 245.0369   | -0.4 | -1.6 | 9.5 | 0.5   | C14 H10 O2 35Cl |

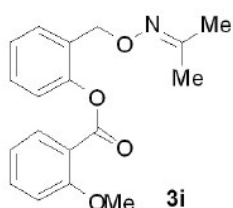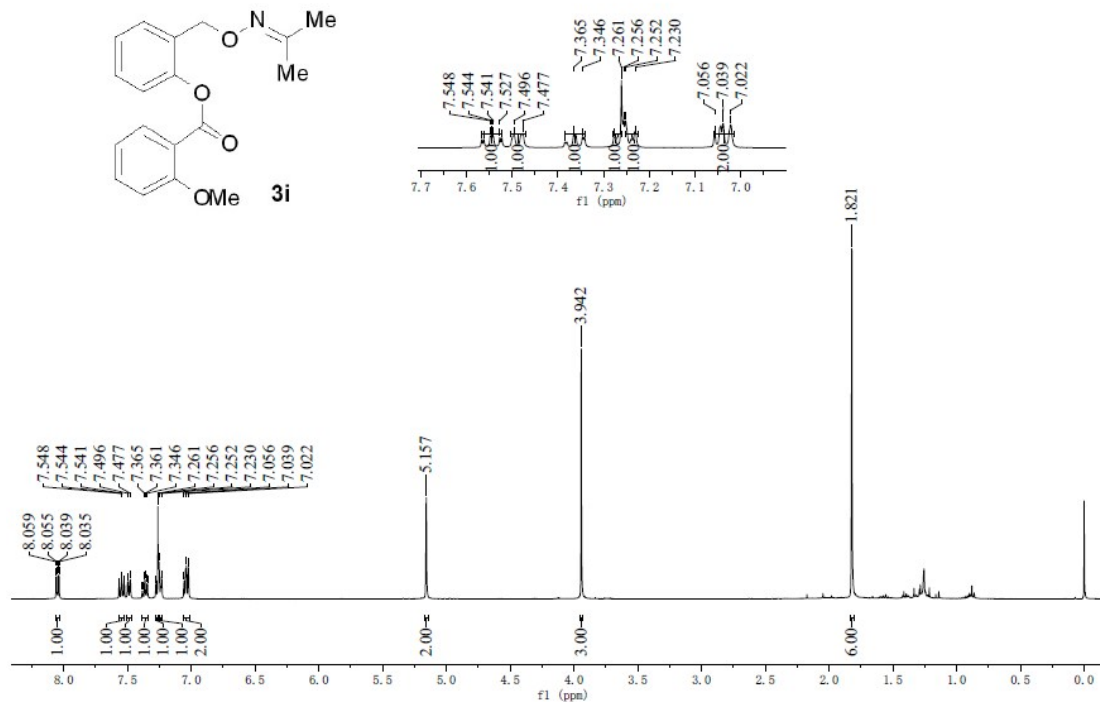

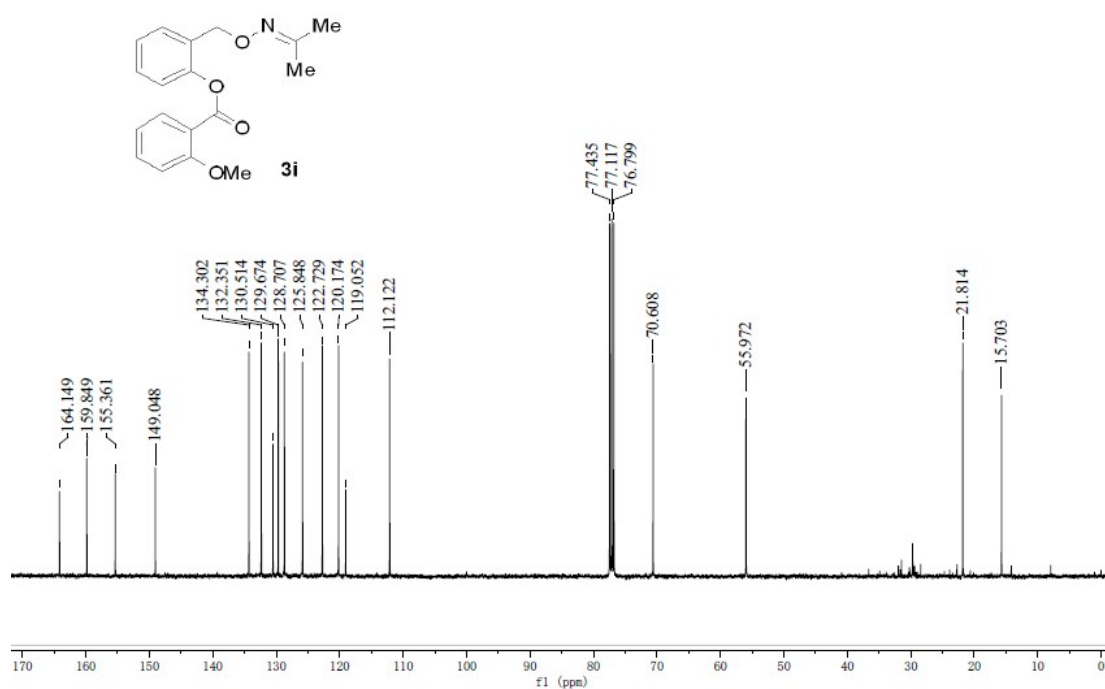

### Elemental Composition Report

#### Single Mass Analysis

Tolerance = 5.0 mDa / DBE: min = -1.5, max = 50.0

Element prediction: Off

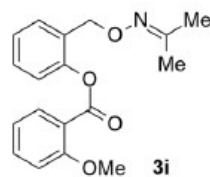

Monoisotopic Mass, Odd and Even Electron Ions

1345 formula(e) evaluated with 75 results within limits (all results (up to 1000) for each mass)

Elements Used:

C: 0-18 H: 0-19 N: 0-1 O: 0-4

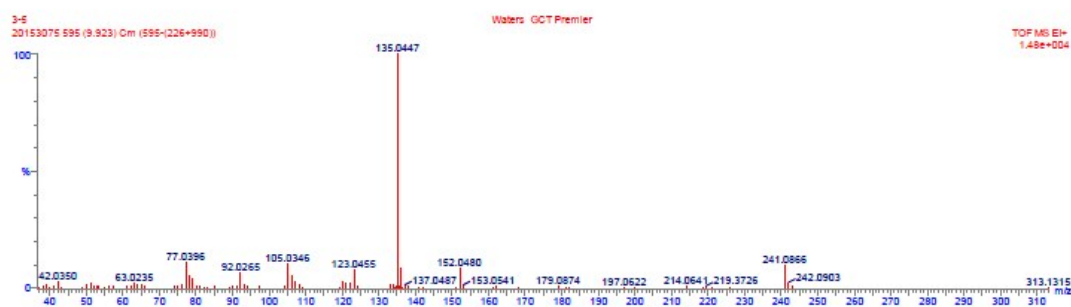

Minimum: 0.13  
Maximum: 100.00

5.0 10.0 50.0

| Mass     | RA   | Calc. Mass | mDa | PPM | DBE  | i-FIT     | Formula      |
|----------|------|------------|-----|-----|------|-----------|--------------|
| 313.1315 | 0.14 | 313.1314   | 0.1 | 0.3 | 10.0 | 5546028.5 | C18 H19 N O4 |

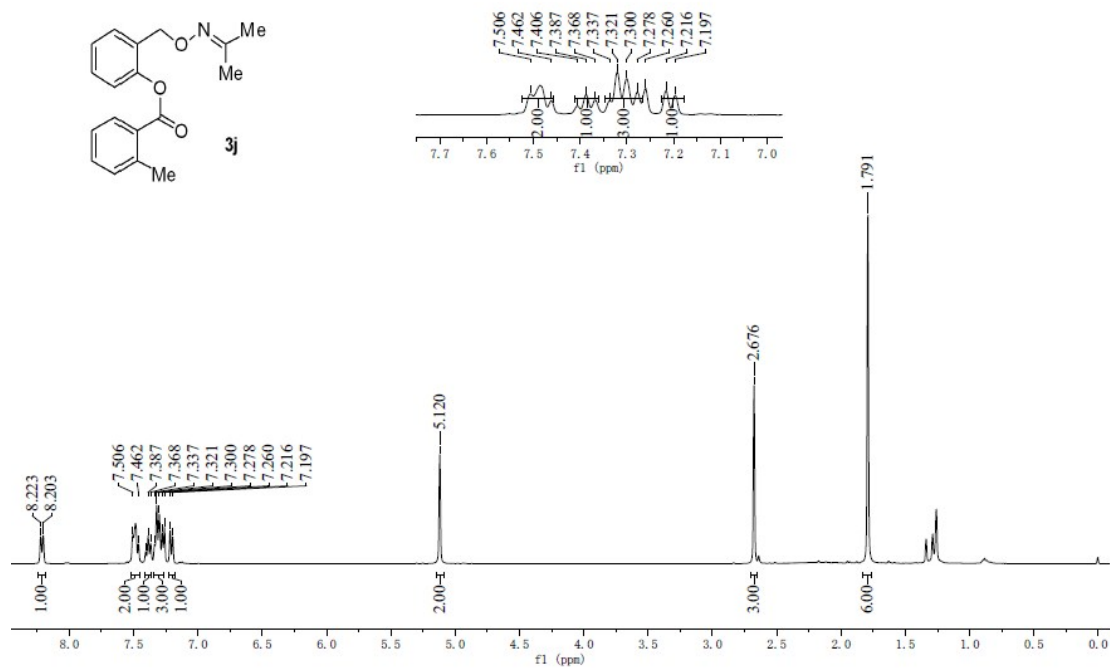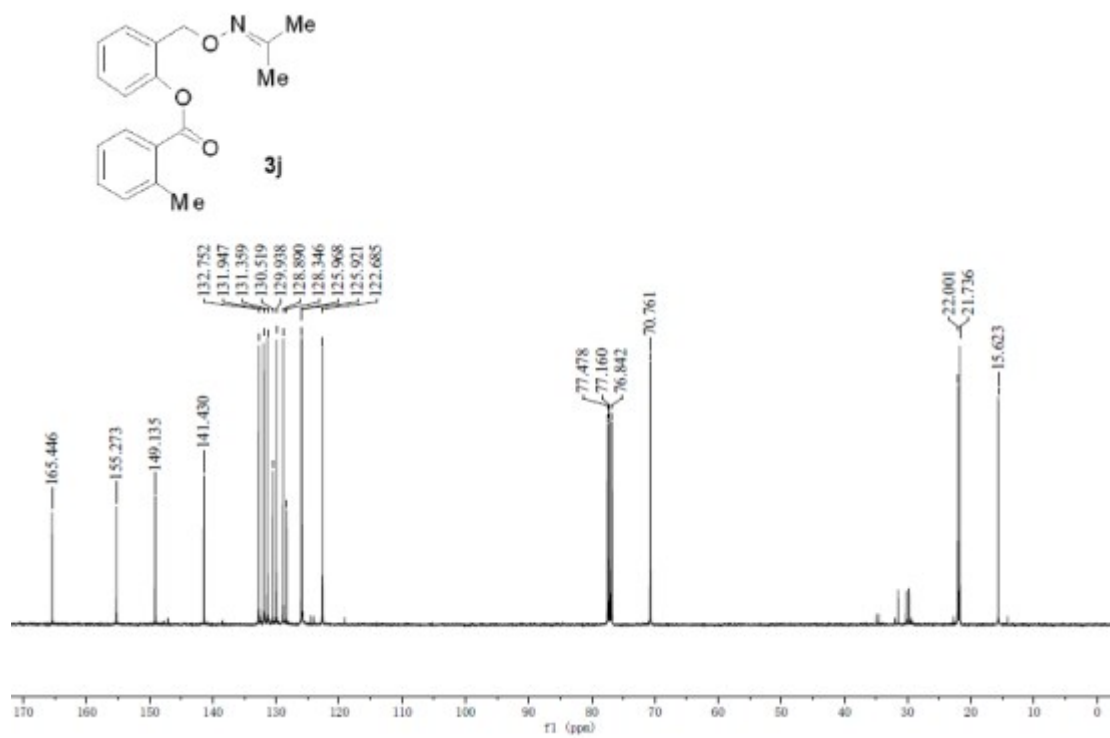

## Elemental Composition Report

### Single Mass Analysis

Tolerance = 5.0 mDa / DBE: min = -1.5, max = 50.0  
 Element prediction: Off

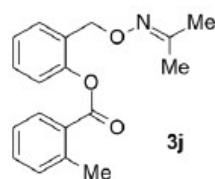

### Monoisotopic Mass, Odd and Even Electron Ions

333 formula(e) evaluated with 29 results within limits (all results (up to 1000) for each mass)

Elements Used:

C: 0-18 H: 0-19 N: 0-1 O: 0-3

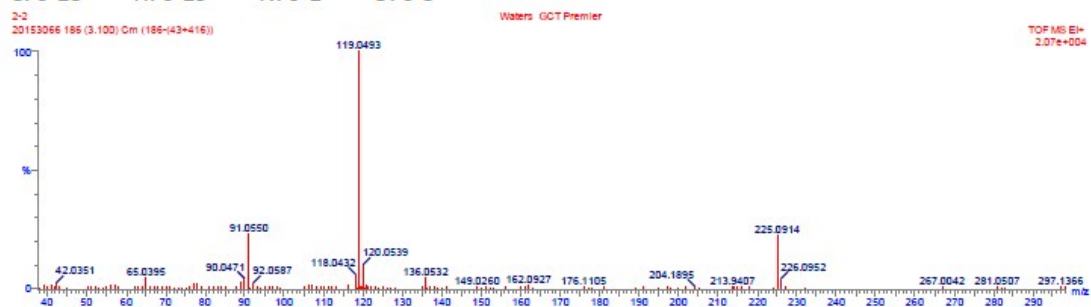

Minimum: 0.80 Maximum: 100.00  
 5.0 10.0 -1.5 50.0

| Mass     | RA   | Calc. Mass | mDa | PPM | DBE  | i-FIT     | Formula      |
|----------|------|------------|-----|-----|------|-----------|--------------|
| 297.1366 | 0.89 | 297.1365   | 0.1 | 0.3 | 10.0 | 2773019.3 | C18 H19 N O3 |

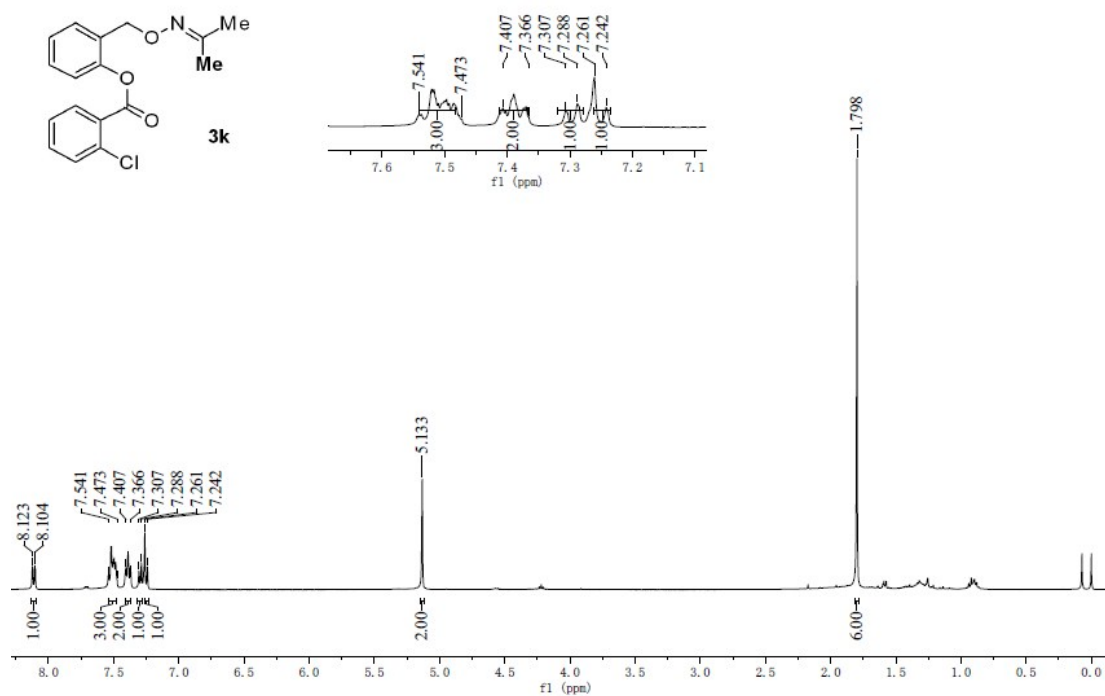

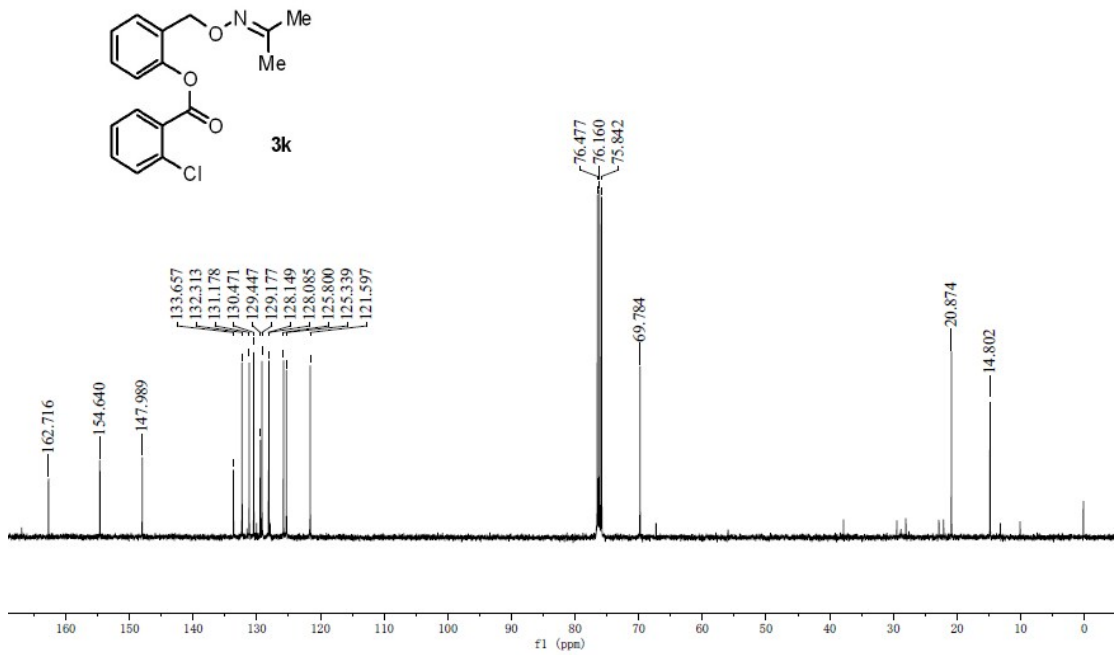

### Elemental Composition Report

#### Single Mass Analysis

Tolerance = 5.0 mDa / DBE: min = -1.5, max = 50.0  
 Element prediction: Off

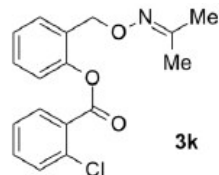

#### Monoisotopic Mass, Odd and Even Electron Ions

504 formula(e) evaluated with 27 results within limits (all results (up to 1000) for each mass)

Elements Used:

C: 0-17 H: 0-16 N: 0-1 O: 0-3 35Cl: 0-1 37Cl: 0-1

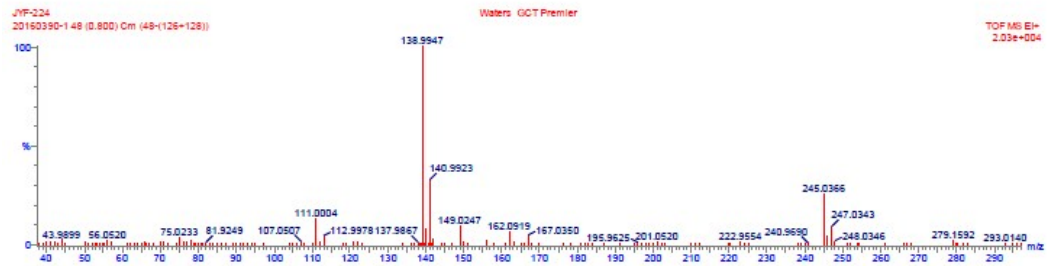

Minimum: 3.00  
 Maximum: 100.00 5.0 10.0 -1.5

| Mass     | RA    | Calc. Mass | mDa  | PPM  | DBE | i-FIT | Formula         |
|----------|-------|------------|------|------|-----|-------|-----------------|
| 245.0366 | 25.52 | 245.0369   | -0.3 | -1.2 | 9.5 | 2.0   | C14 H10 O2 35Cl |



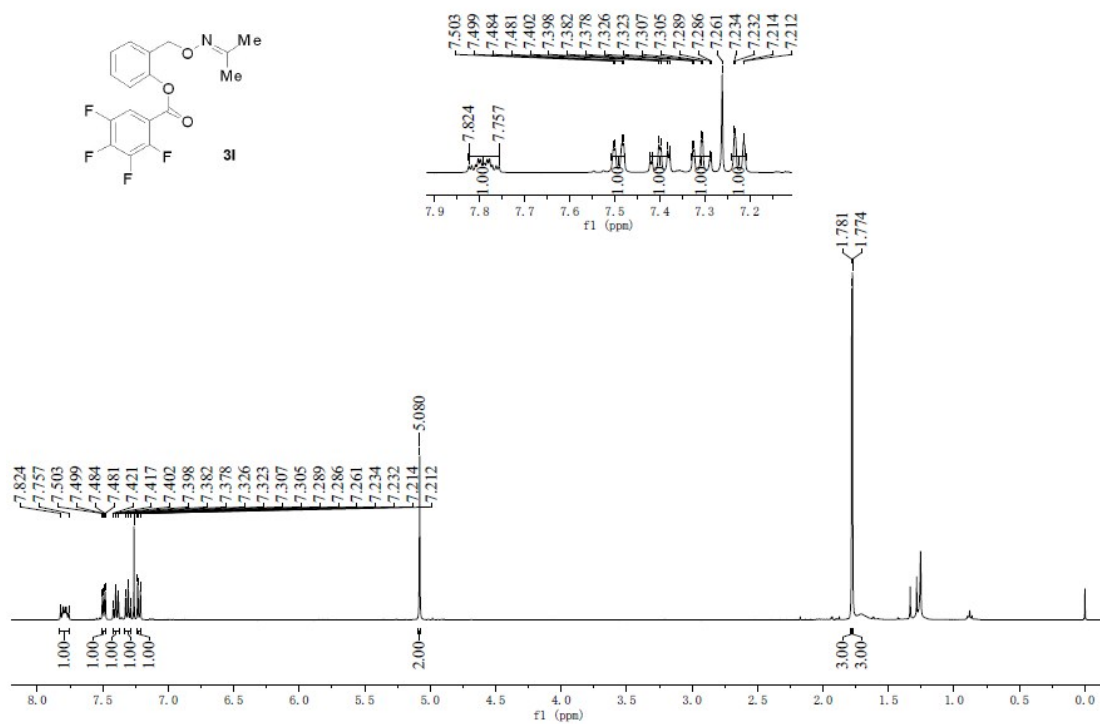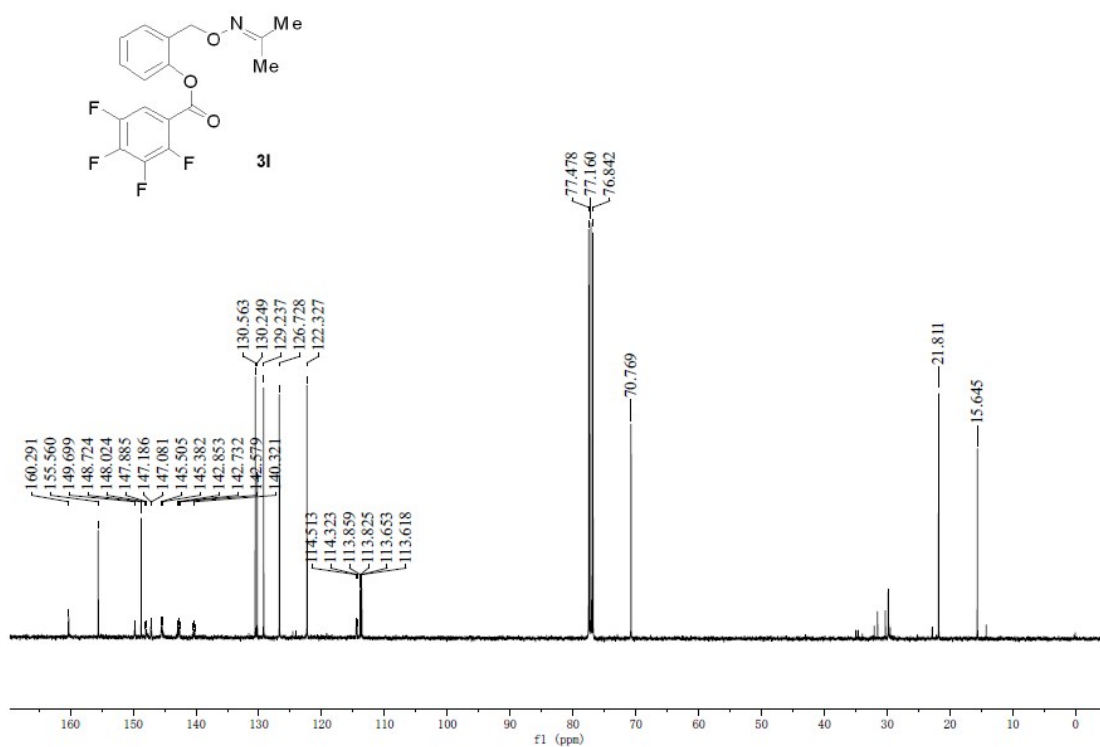



## Elemental Composition Report

### Single Mass Analysis

Tolerance = 5.0 mDa / DBE: min = -1.5, max = 50.0

Element prediction: Off

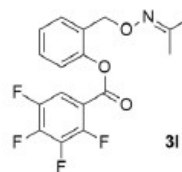

Monoisotopic Mass, Odd and Even Electron Ions

37 formula(e) evaluated with 1 results within limits (all results (up to 1000) for each mass)

Elements Used:

C: 0-17 H: 0-13 N: 0-1 O: 0-3 F: 0-4

JYF-S-222

20160432 120 (2.000) Cm (120-(56+60))

Waters GCT Premier

TOF MS EI+  
Mx4 2.37e4

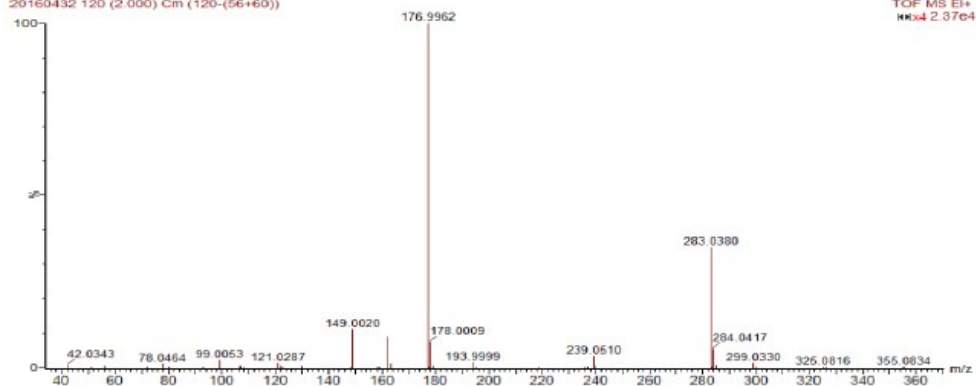

Minimum:

-1.5

Maximum:

5.0

10.0

50.0

| Mass     | Calc. Mass | mDa | PPM | DBE  | i-FIT | Formula       |
|----------|------------|-----|-----|------|-------|---------------|
| 355.0834 | 355.0832   | 0.2 | 0.6 | 10.0 | n/a   | C17H13N O3 F4 |

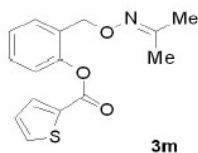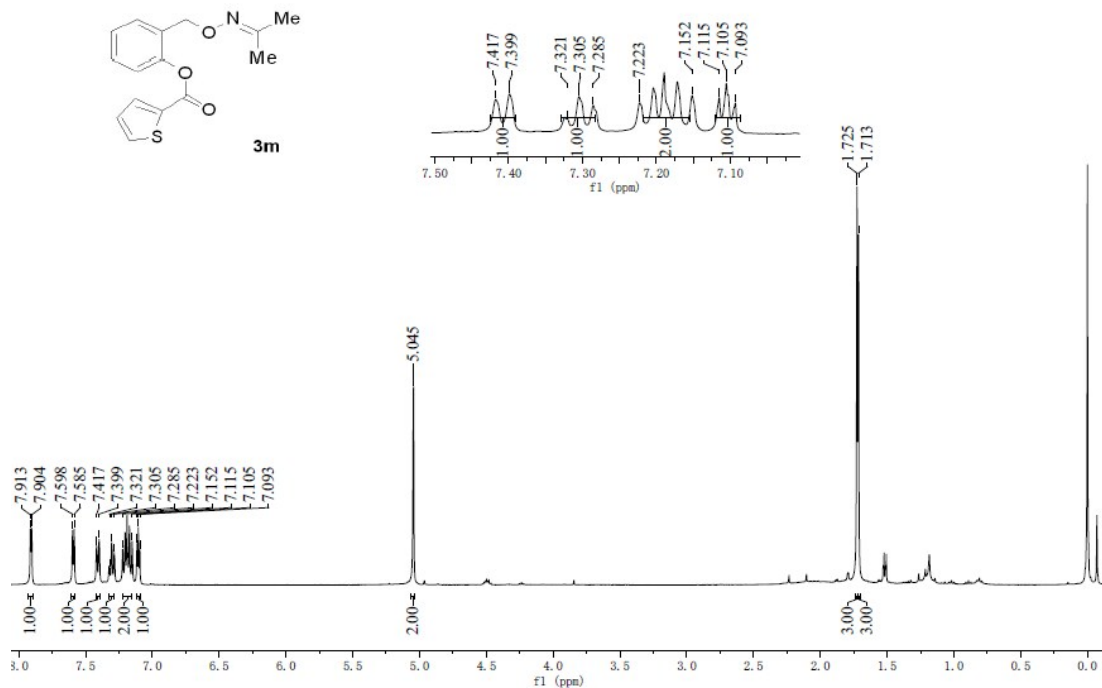

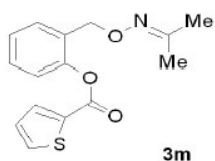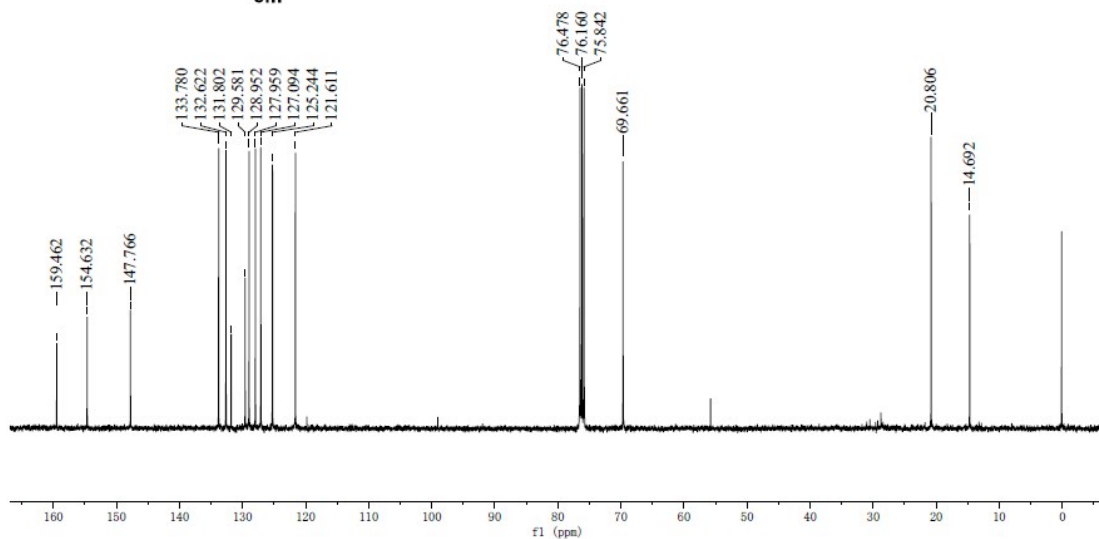

### Elemental Composition Report

#### Single Mass Analysis

Tolerance = 5.0 mDa / DBE: min = -1.5, max = 50.0

Element prediction: Off

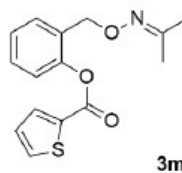

Monoisotopic Mass, Odd and Even Electron Ions

196 formula(e) evaluated with 15 results within limits (all results (up to 1000) for each mass)

Elements Used:

C: 0-15 H: 0-15 N: 0-1 O: 0-3 S: 0-1

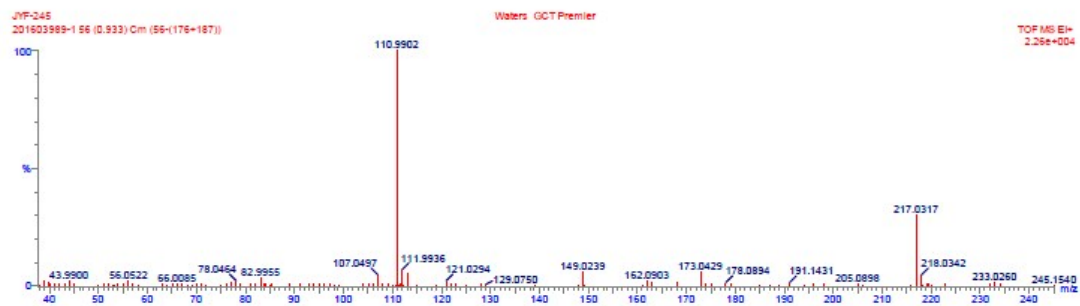

Minimum: 3.00 -1.5  
 Maximum: 100.00 5.0 10.0 50.0

| Mass     | RA    | Calc. Mass | mDa  | PPM  | DBE | i-FIT     | Formula     |
|----------|-------|------------|------|------|-----|-----------|-------------|
| 217.0317 | 29.71 | 217.0323   | -0.6 | -2.8 | 8.5 | 2776597.0 | C12 H9 O2 S |

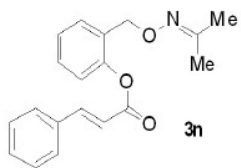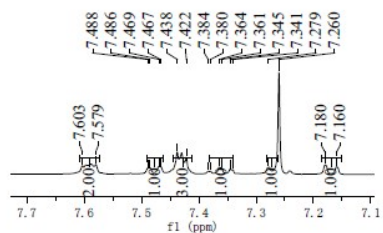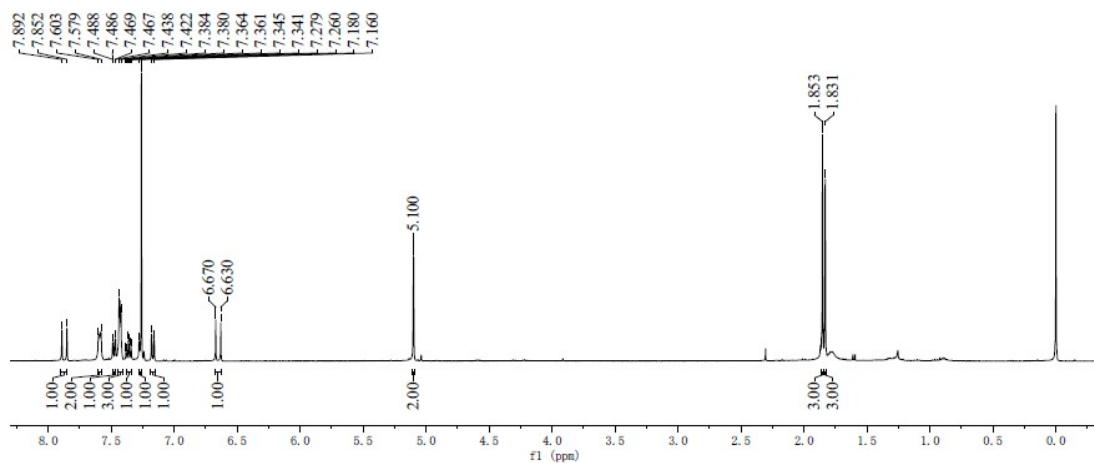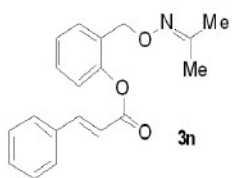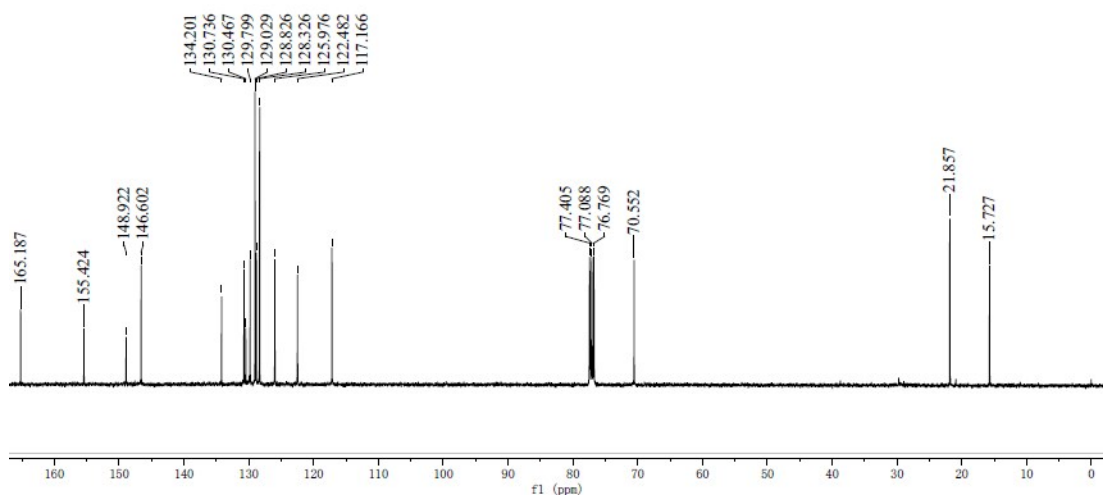

## Elemental Composition Report

### Single Mass Analysis

Tolerance = 5.0 mDa / DBE: min = -1.5, max = 50.0

Element prediction: Off

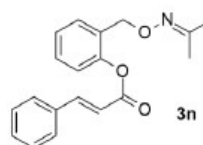

Monoisotopic Mass, Odd and Even Electron Ions

702 formula(e) evaluated with 48 results within limits (all results (up to 1000) for each mass)

Elements Used:

C: 0-19 H: 0-19 N: 0-1 O: 0-3

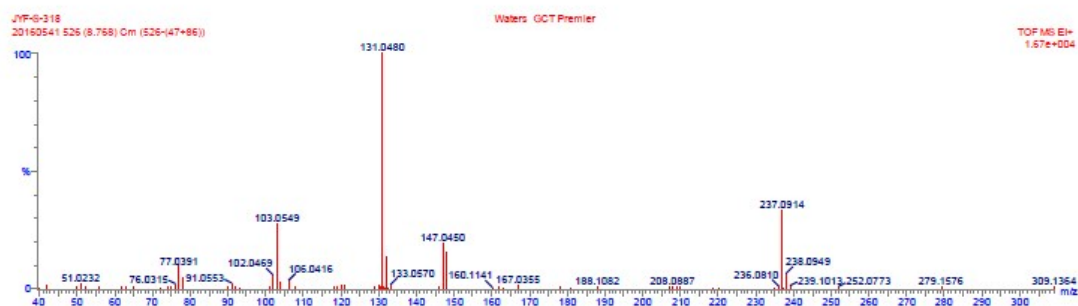

Minimum: 0.18  
Maximum: 100.00

| Mass     | RA   | Calc. Mass | mDa  | PPM  | DBE  | i-FIT     | Formula      |
|----------|------|------------|------|------|------|-----------|--------------|
| 309.1364 | 0.19 | 309.1365   | -0.1 | -0.3 | 11.0 | 5546032.0 | C19 H19 N O3 |

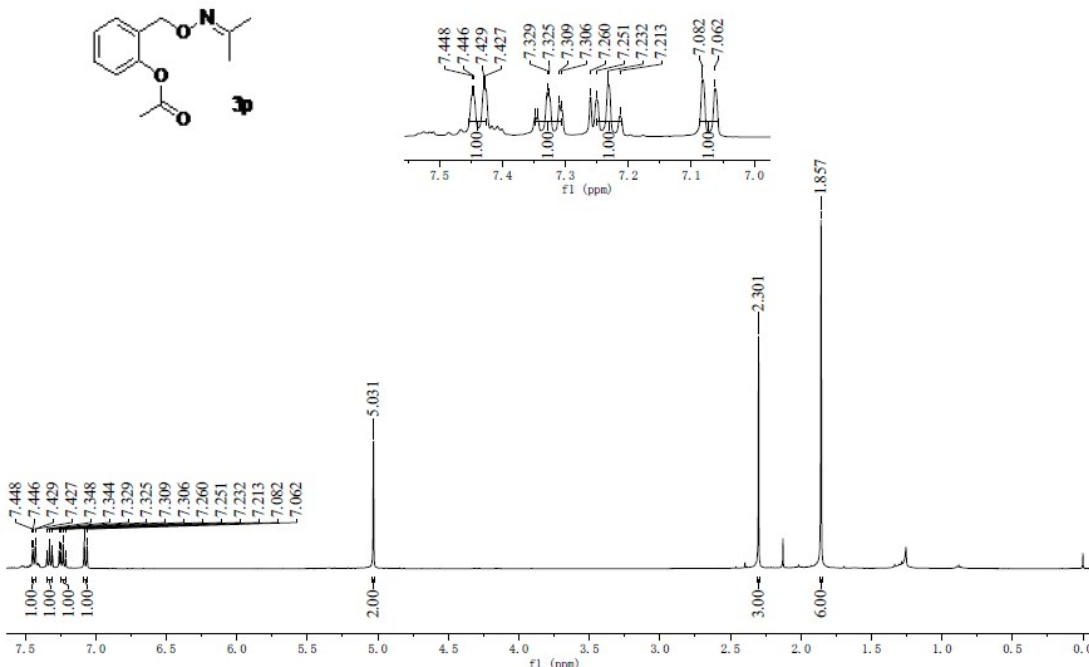

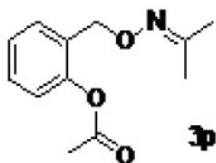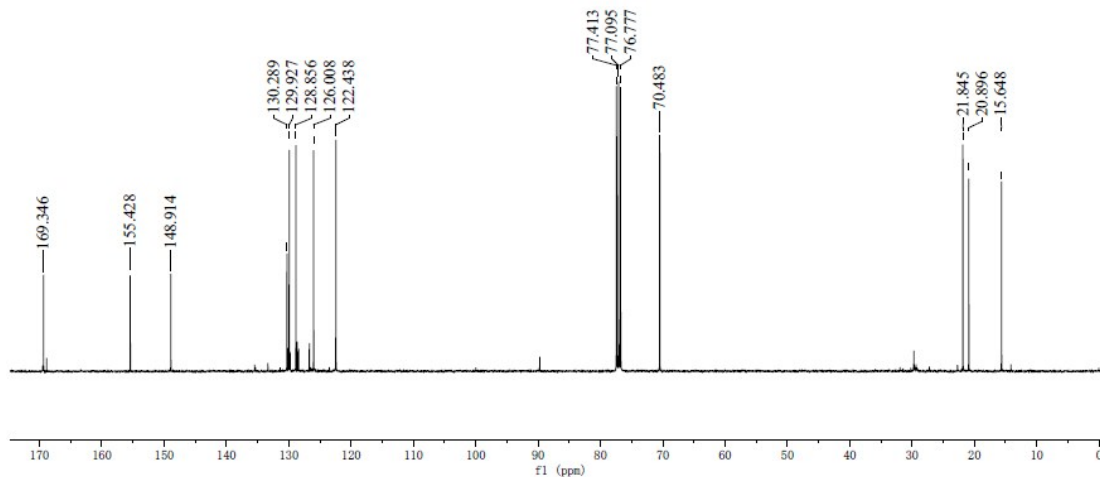

### Elemental Composition Report

#### Single Mass Analysis

Tolerance = 5.0 mDa / DBE: min = -1.5, max = 50.0

Element prediction: Off

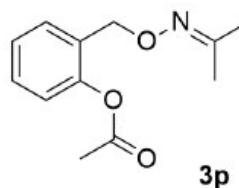

#### Monoisotopic Mass, Odd and Even Electron Ions

290 formula(e) evaluated with 28 results within limits (all results (up to 1000) for each mass)

Elements Used:

C: 0-12 H: 0-15 N: 0-1 O: 0-3

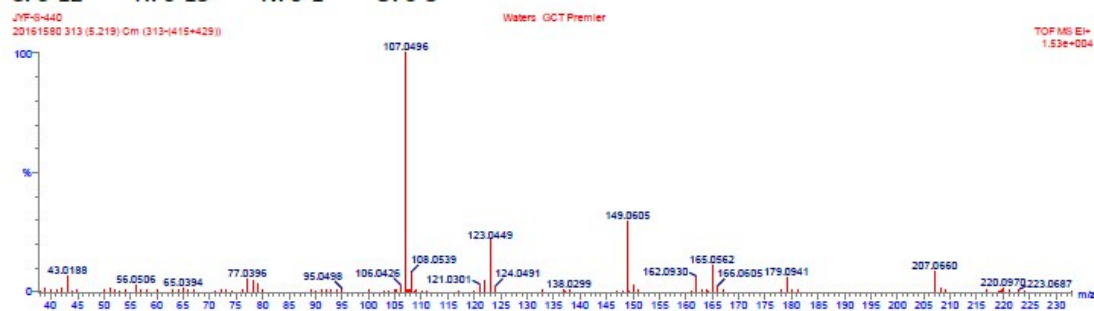

Minimum: 0.70  
Maximum: 100.00 5.0 10.0 -1.5 50.0

| Mass     | RA   | Calc. Mass | mDa  | PPM  | DBE | i-FIT     | Formula      |
|----------|------|------------|------|------|-----|-----------|--------------|
| 221.1050 | 0.74 | 221.1052   | -0.2 | -0.9 | 6.0 | 2773065.3 | C12 H15 N O3 |

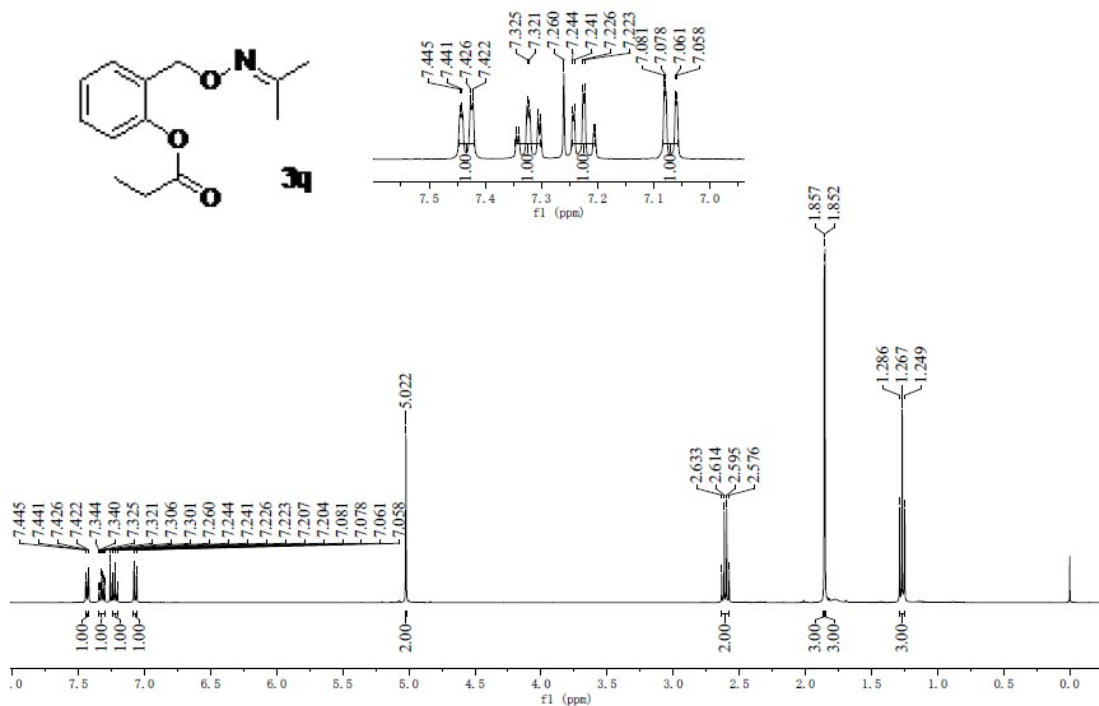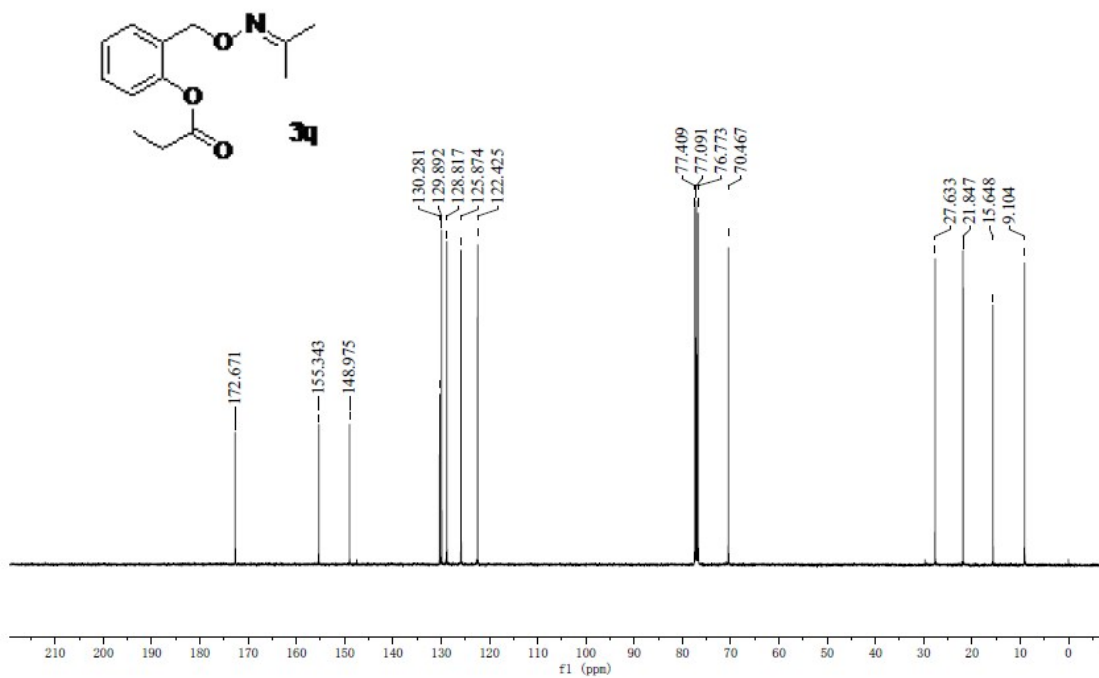



## Elemental Composition Report

### Single Mass Analysis

Tolerance = 5.0 mDa / DBE: min = -1.5, max = 50.0  
Element prediction: Off

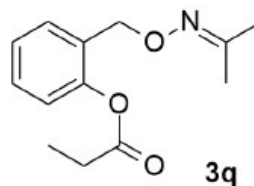

### Monoisotopic Mass, Odd and Even Electron Ions

766 formula(e) evaluated with 49 results within limits (all results (up to 1000) for each mass)

Elements Used:

C: 0-13 H: 0-17 N: 0-1 O: 0-3

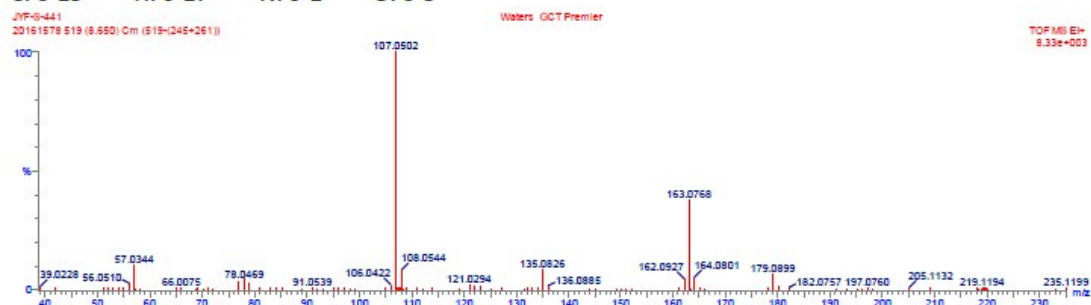

Minimum: 0.20 Maximum: 100.00  
5.0 10.0 -1.5 50.0

| Mass     | RA   | Calc. Mass | mDa  | PPM  | DBE | i-FIT     | Formula      |
|----------|------|------------|------|------|-----|-----------|--------------|
| 235.1199 | 0.21 | 235.1208   | -0.9 | -3.8 | 6.0 | 5546026.0 | C13 H17 N O3 |

## 5.2 Copies of the spectra for Scheme 4

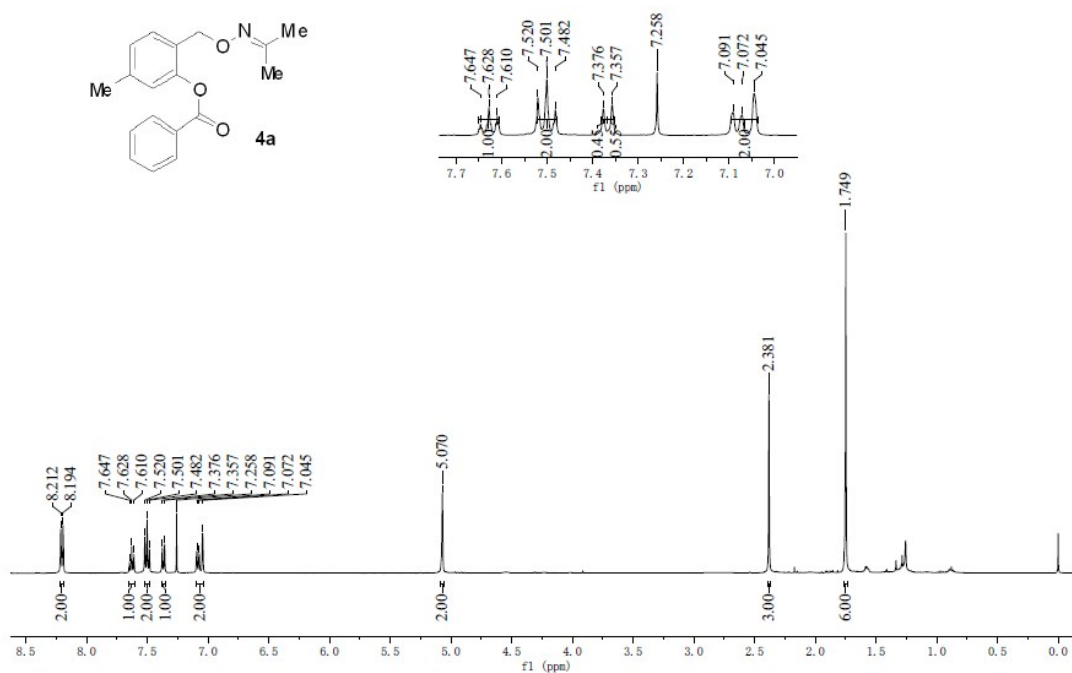

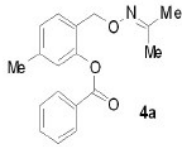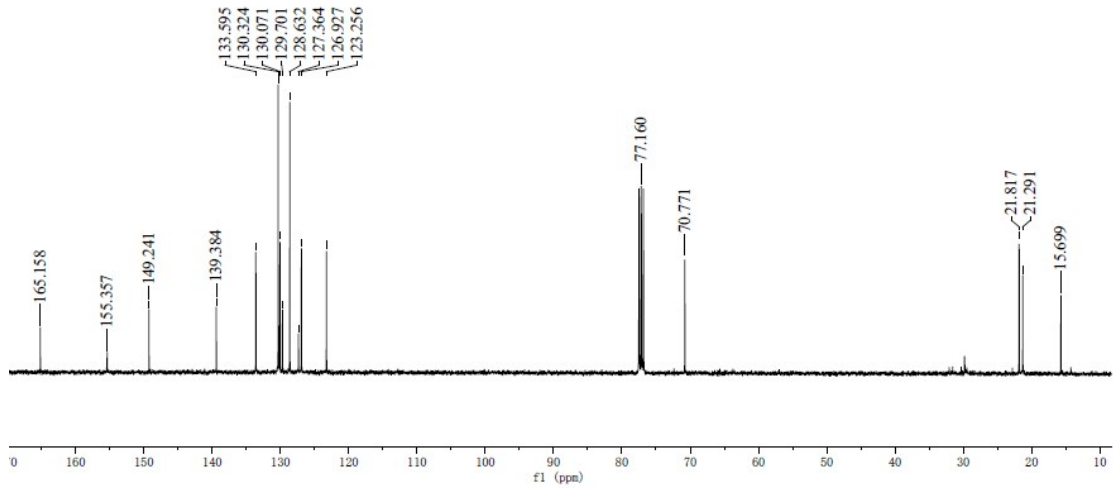

### Elemental Composition Report

#### Single Mass Analysis

Tolerance = 5.0 mDa / DBE: min = -1.5, max = 50.0

Element prediction: Off

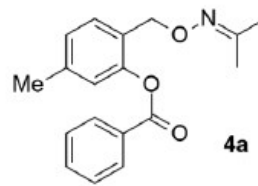

#### Monoisotopic Mass, Odd and Even Electron Ions

1453 formula(e) evaluated with 86 results within limits (all results (up to 1000) for each mass)

Elements Used:

C: 0-18 H: 0-19 N: 0-1 O: 0-3

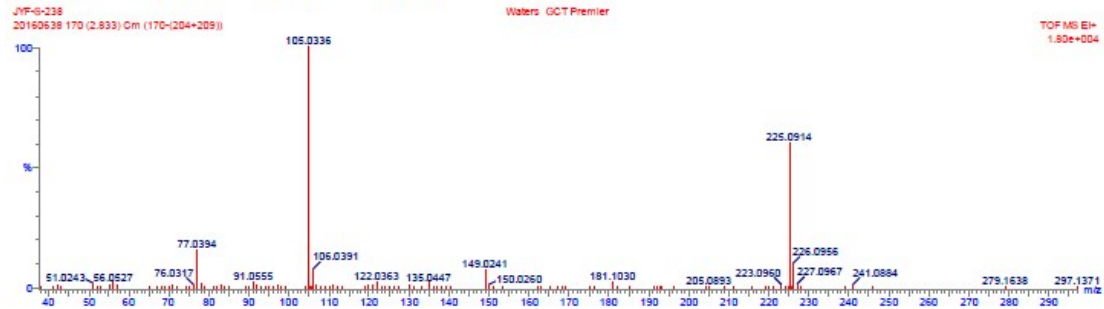

Minimum: 0.12  
 Maximum: 100.00

| Mass     | RA   | Calc. Mass | mDa | PPM | DBE  | i-FIT     | Formula      |
|----------|------|------------|-----|-----|------|-----------|--------------|
| 297.1371 | 0.13 | 297.1365   | 0.6 | 2.0 | 10.0 | 5546029.0 | C18 H19 N O3 |



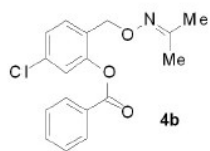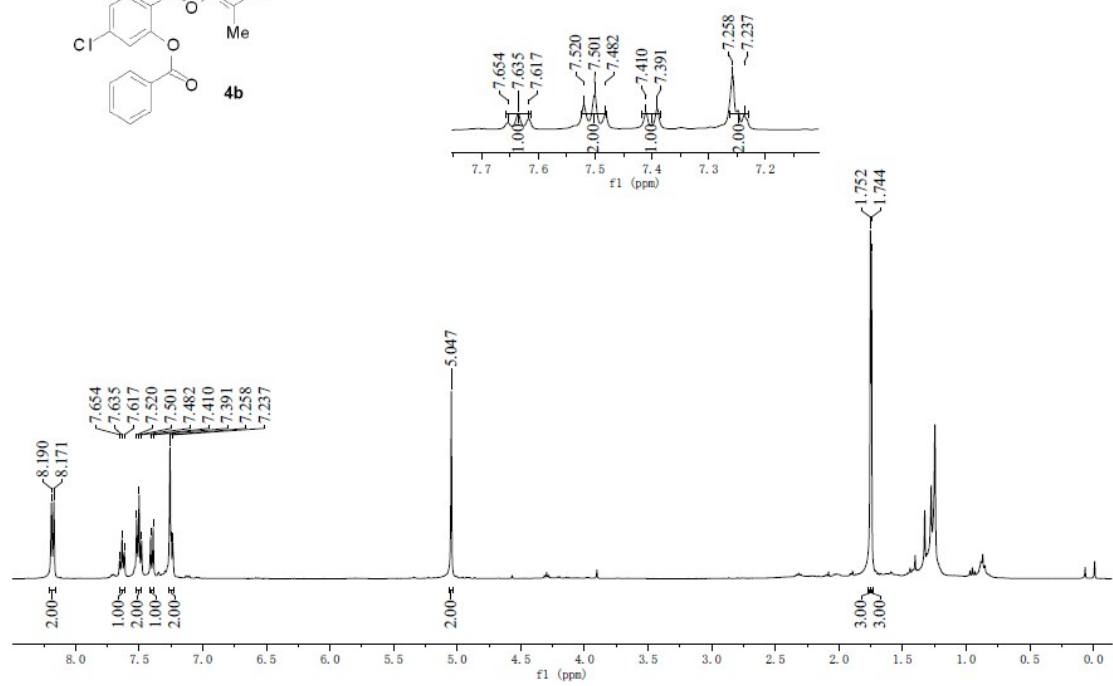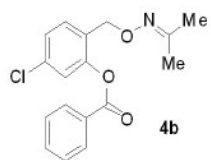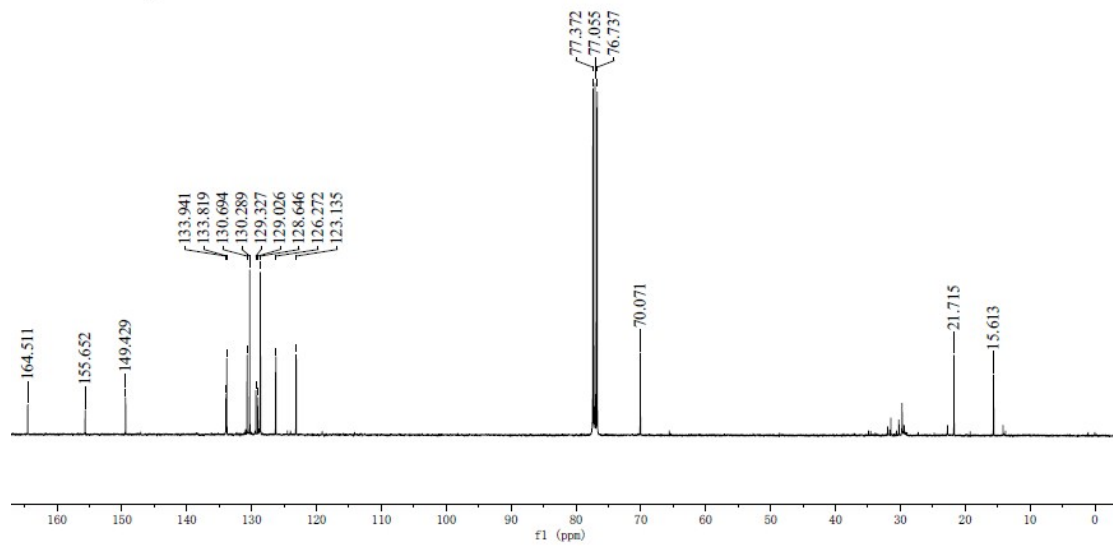

## Elemental Composition Report

### Single Mass Analysis

Tolerance = 5.0 mDa / DBE: min = -1.5, max = 50.0

Element prediction: Off

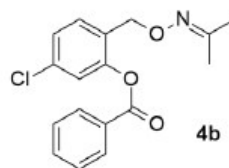

Monoisotopic Mass, Odd and Even Electron Ions

991 formula(e) evaluated with 58 results within limits (all results (up to 1000) for each mass)

Elements Used:

C: 0-17 H: 0-16 N: 0-1 O: 0-3 35Cl: 0-1 37Cl: 0-1

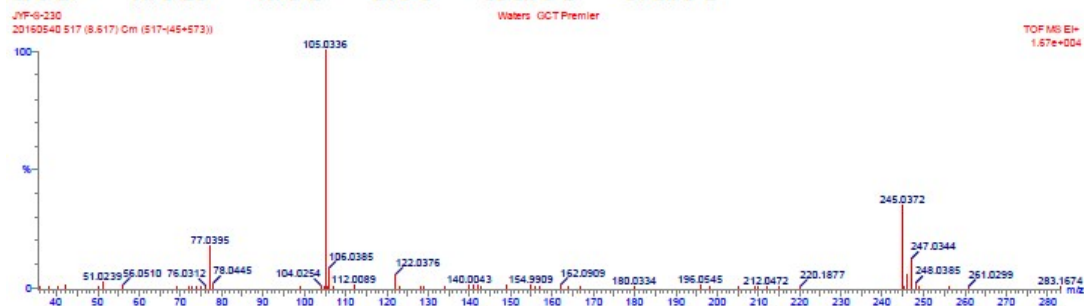

Minimum: 0.29 Maximum: 100.00 5.0 10.0 -1.5 50.0

| Mass     | RA    | Calc. Mass | mDa | PPM | DBE | i-FIT | Formula                                           |
|----------|-------|------------|-----|-----|-----|-------|---------------------------------------------------|
| 245.0372 | 34.32 | 245.0369   | 0.3 | 1.2 | 9.5 | 0.4   | C <sub>14</sub> H <sub>10</sub> O <sub>2</sub> Cl |

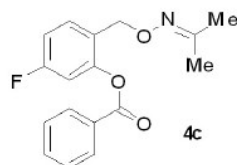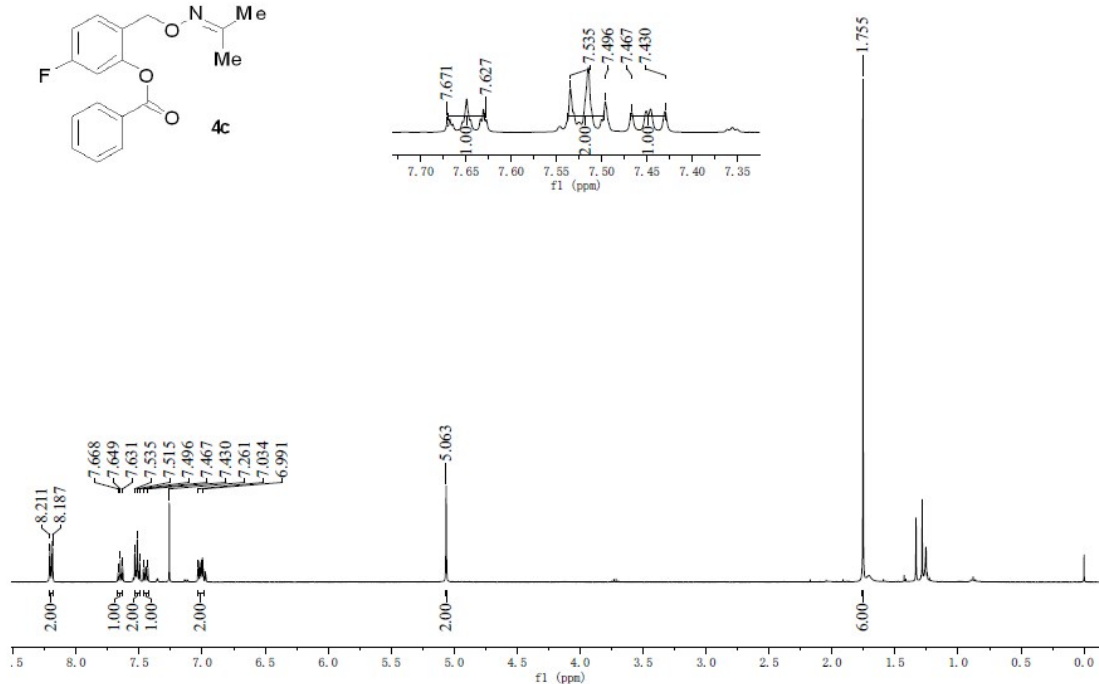

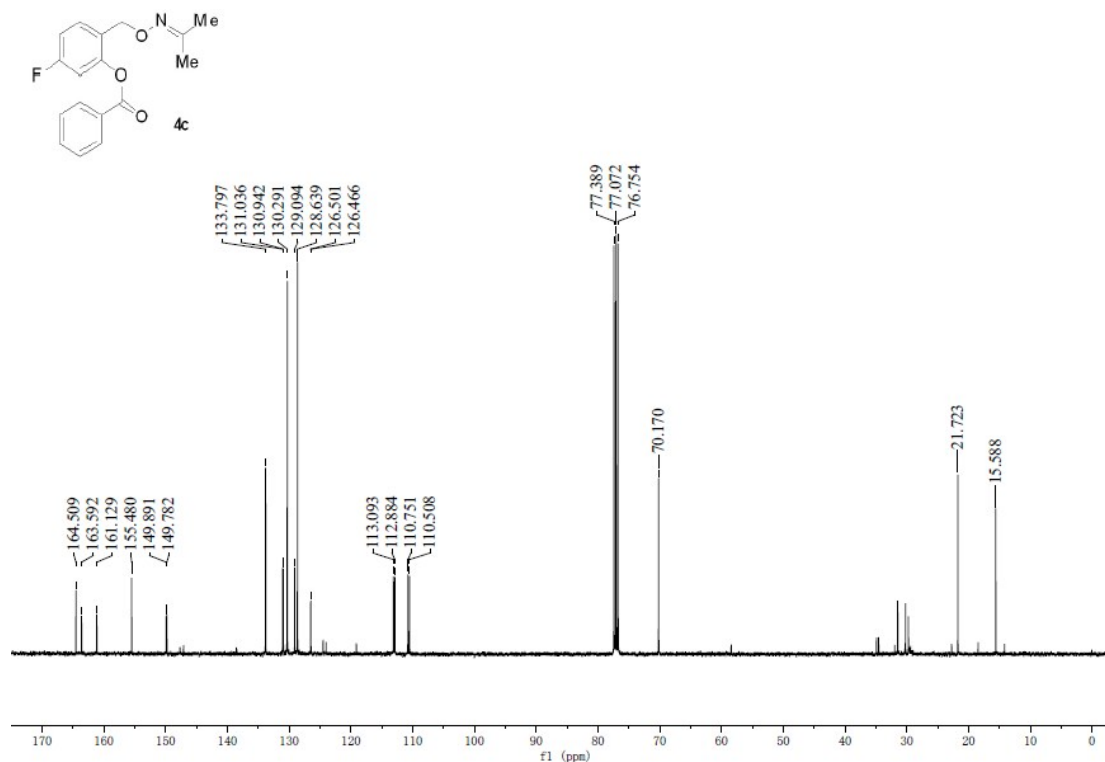

### Elemental Composition Report

#### Single Mass Analysis

Tolerance = 5.0 mDa / DBE: min = -1.5, max = 50.0

Element prediction: Off

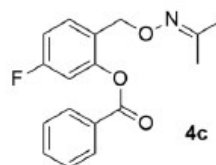

#### Monoisotopic Mass, Odd and Even Electron Ions

2386 formula(e) evaluated with 131 results within limits (all results (up to 1000) for each mass)

Elements Used:

C: 0-17 H: 0-16 N: 0-1 O: 0-3 F: 0-1

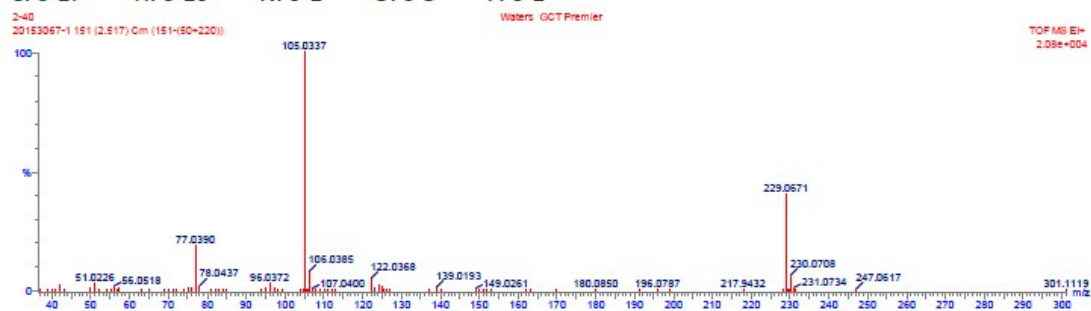

Minimum: 0.10  
Maximum: 100.00

| Mass     | RA   | Calc. Mass | mDa | PPM | DBE  | i-FIT     | Formula        |
|----------|------|------------|-----|-----|------|-----------|----------------|
| 301.1119 | 0.11 | 301.1114   | 0.5 | 1.7 | 10.0 | 5546028.5 | C17 H16 N O3 F |

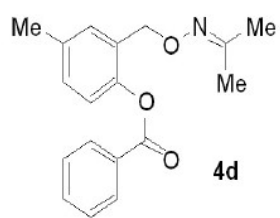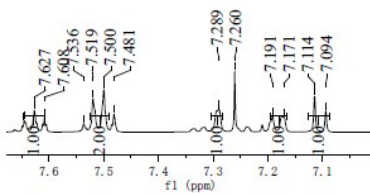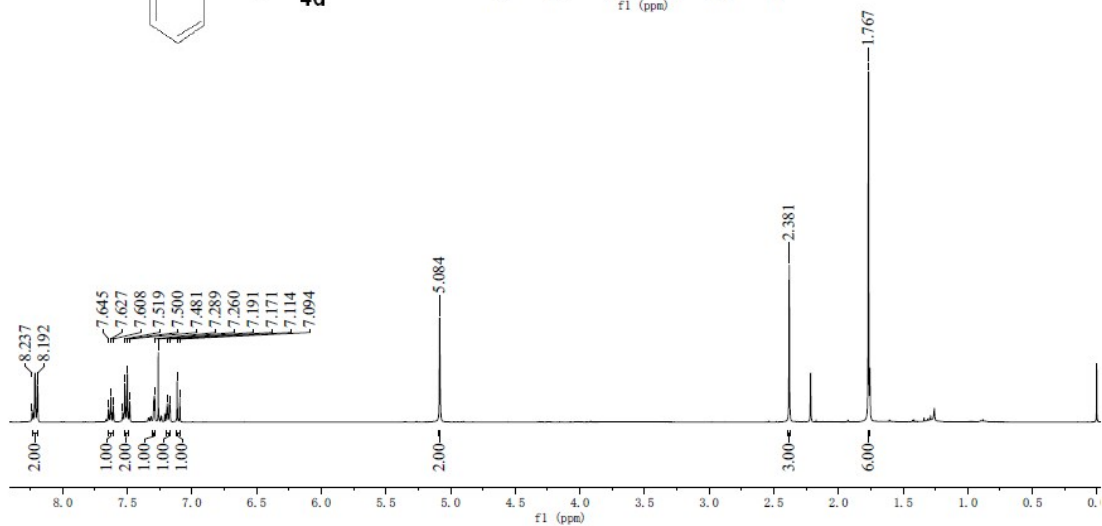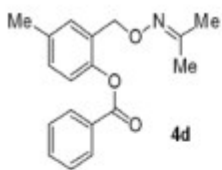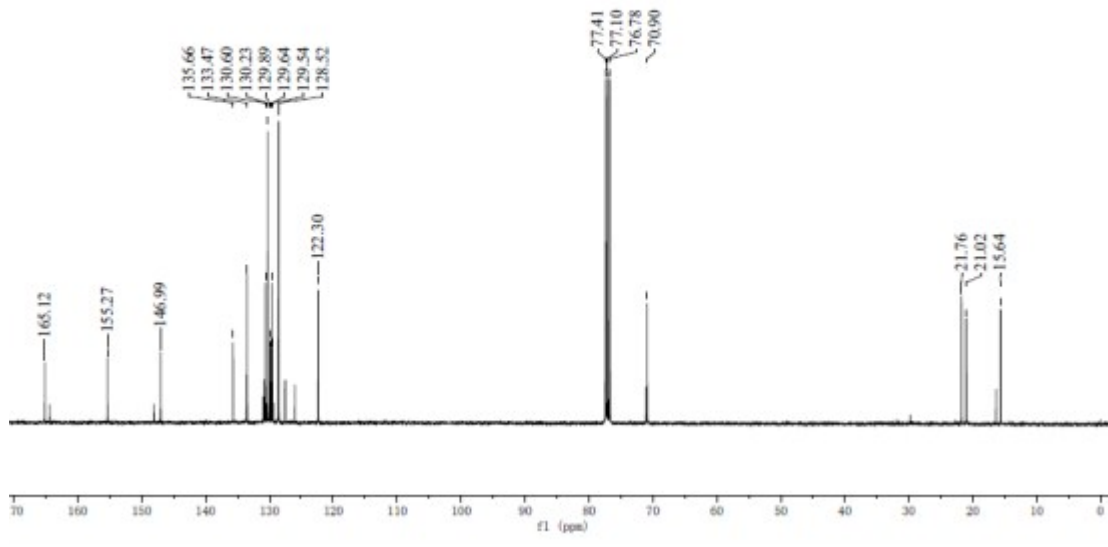

## Elemental Composition Report

### Single Mass Analysis

Tolerance = 5.0 mDa / DBE: min = -1.5, max = 50.0

Element prediction: Off

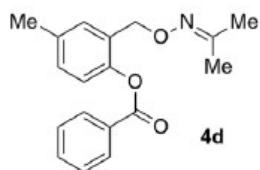

### Monoisotopic Mass, Odd and Even Electron Ions

384 formula(e) evaluated with 31 results within limits (all results (up to 1000) for each mass)

Elements Used:

C: 0-18 H: 0-19 N: 0-1 O: 0-3

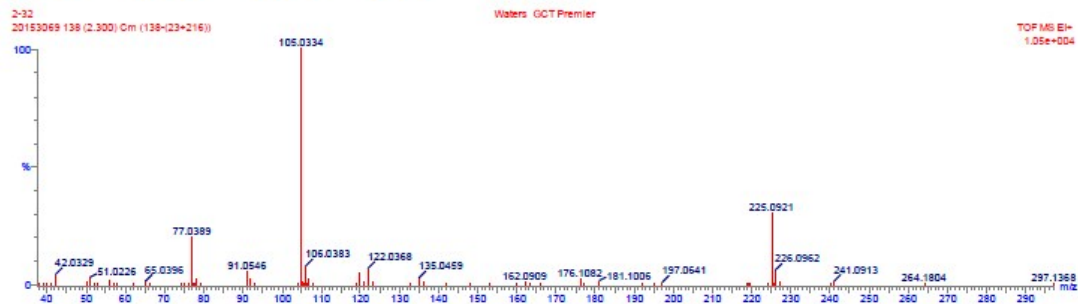

Minimum: 0.50  
Maximum: 100.00

| Mass     | RA   | Calc. Mass | mDa | PPM | DBE  | i-FIT     | Formula      |
|----------|------|------------|-----|-----|------|-----------|--------------|
| 297.1368 | 0.52 | 297.1365   | 0.3 | 1.0 | 10.0 | 5546041.0 | C18 H19 N O3 |

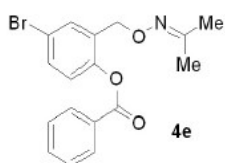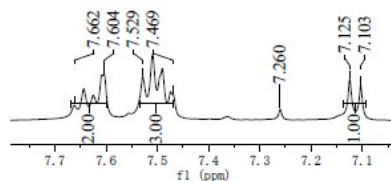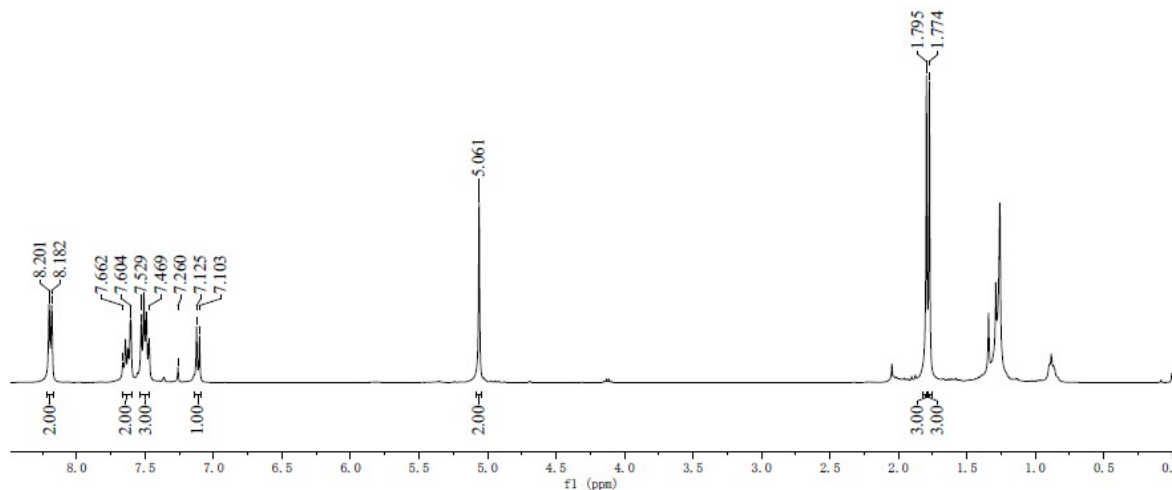

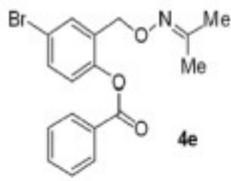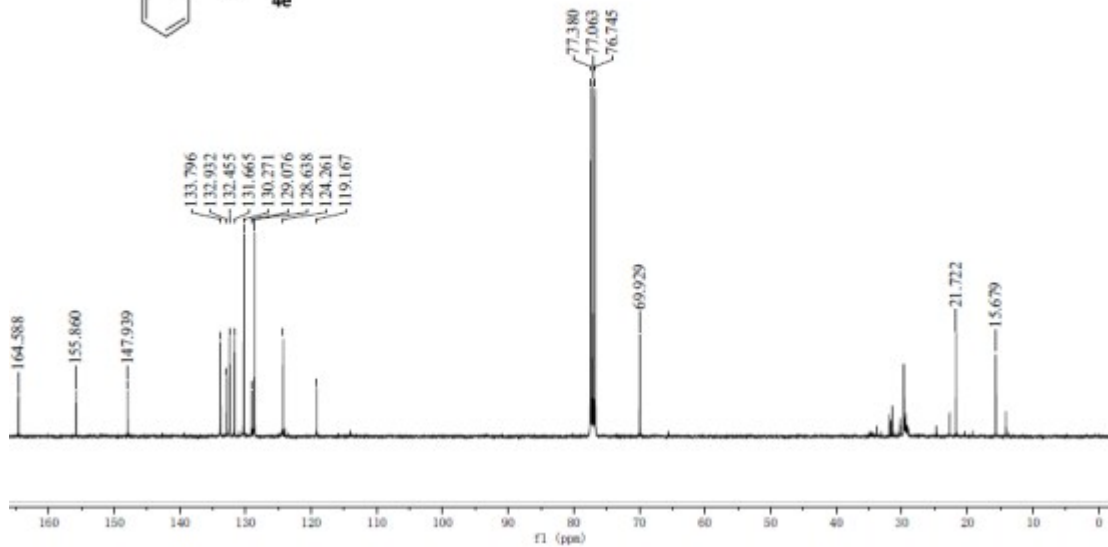

### Elemental Composition Report

#### Single Mass Analysis

Tolerance = 5.0 mDa / DBE: min = -1.5, max = 50.0

Element prediction: Off

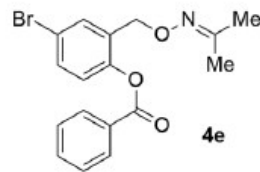

#### Monoisotopic Mass, Odd and Even Electron Ions

1890 formula(e) evaluated with 88 results within limits (all results (up to 1000) for each mass)

Elements Used:

C: 0-17 H: 0-16 N: 0-1 O: 0-3 <sup>79</sup>Br: 0-1 <sup>81</sup>Br: 0-1

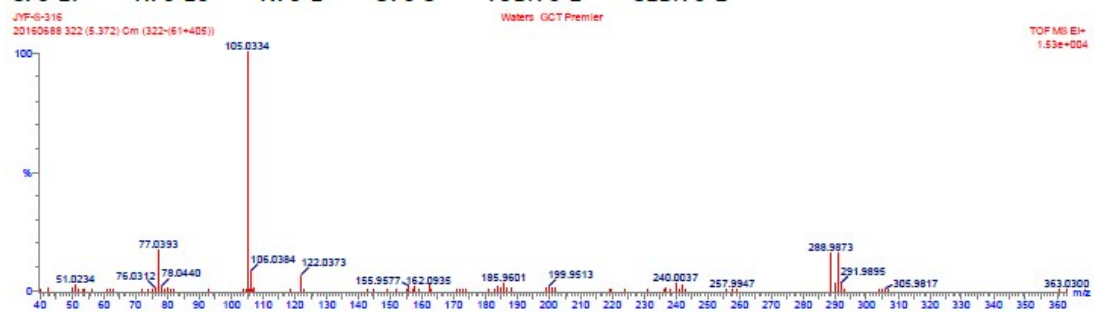

Minimum: 0.20  
Maximum: 100.00

| Mass     | RA   | Calc. Mass | mDa | PPM | DBE  | i-FIT     | Formula           |
|----------|------|------------|-----|-----|------|-----------|-------------------|
| 363.0300 | 0.32 | 363.0293   | 0.7 | 1.9 | 10.0 | 5546037.5 | C17 H16 N O3 81Br |

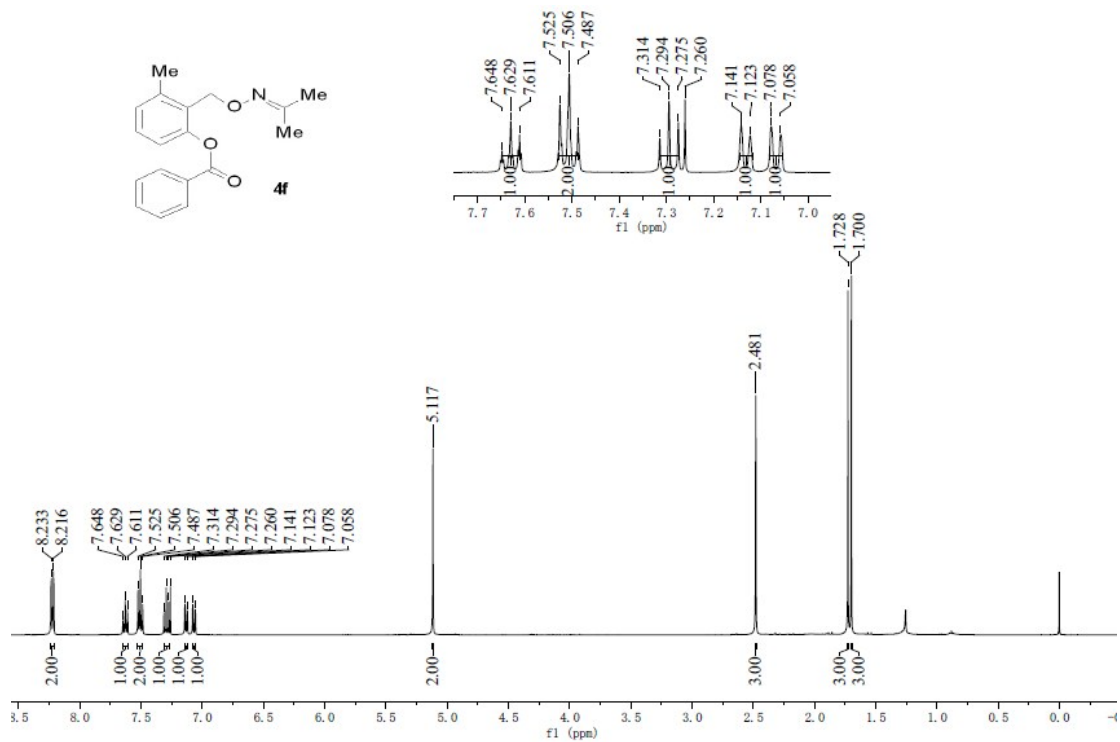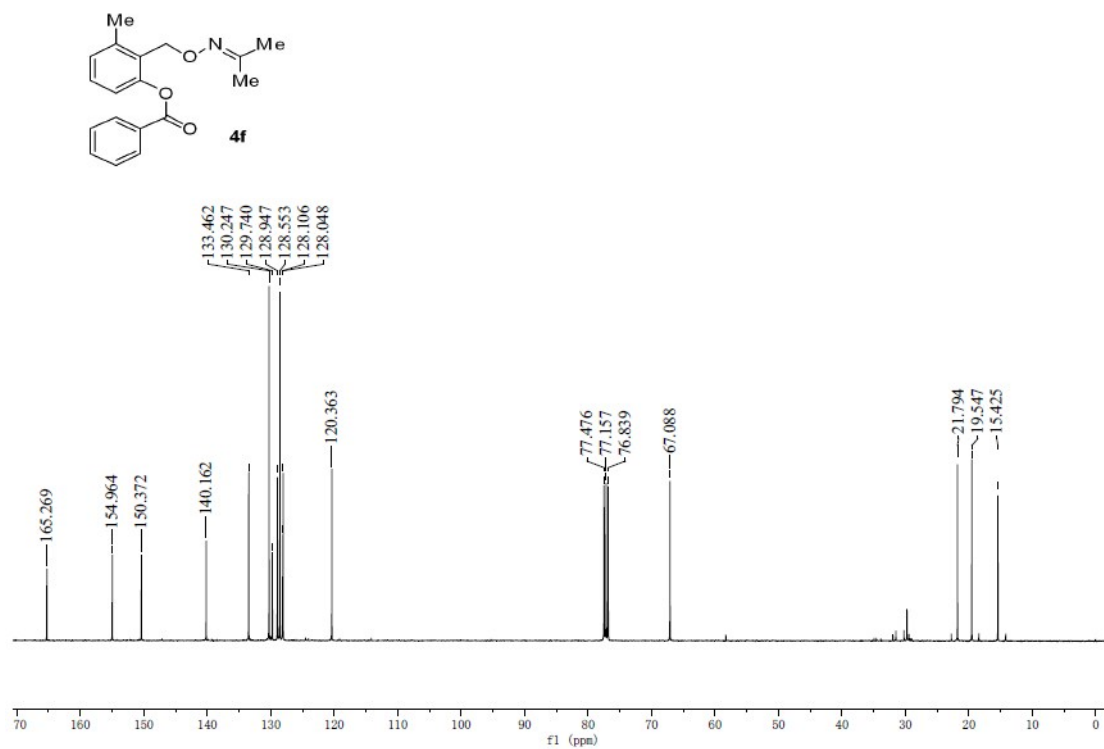



## Elemental Composition Report

### Single Mass Analysis

Tolerance = 5.0 mDa / DBE: min = -1.5, max = 50.0

Element prediction: Off

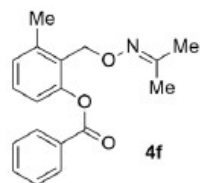

Monoisotopic Mass, Odd and Even Electron Ions

96 formula(e) evaluated with 8 results within limits (all results (up to 1000) for each mass)

Elements Used:

C: 0-18 H: 0-19 N: 0-1 O: 0-3

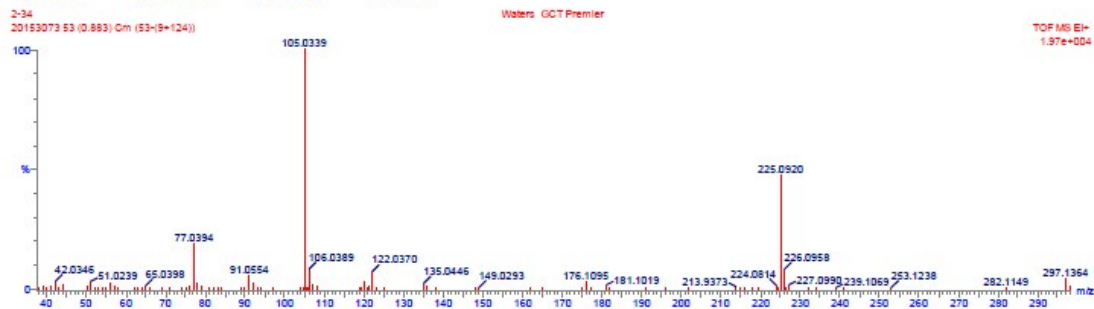

Minimum: 3.00 -1.5  
Maximum: 100.00 5.0 10.0 50.0

| Mass     | RA   | Calc. Mass | mDa  | PPM  | DBE  | i-FIT     | Formula      |
|----------|------|------------|------|------|------|-----------|--------------|
| 297.1364 | 4.17 | 297.1365   | -0.1 | -0.3 | 10.0 | 2773157.8 | C18 H19 N O3 |

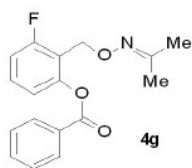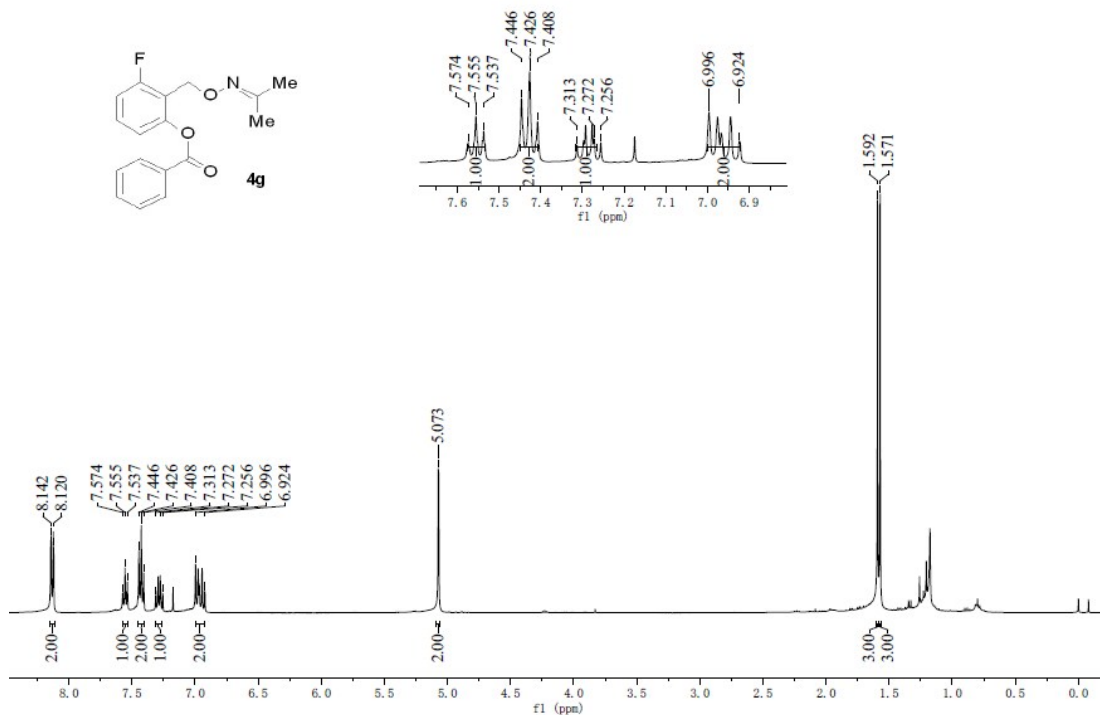



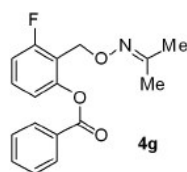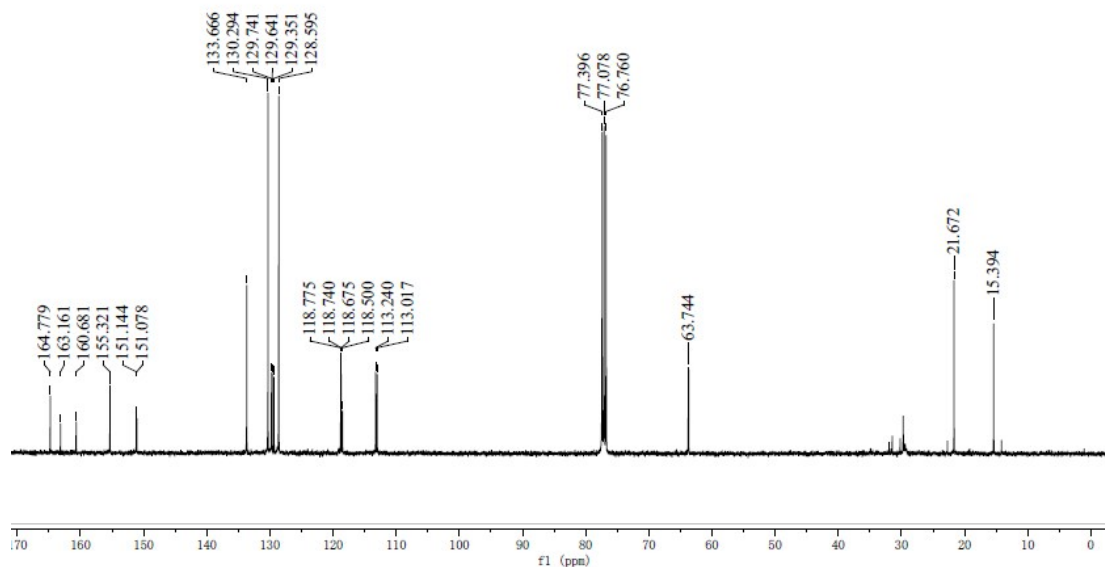

### Elemental Composition Report

#### Single Mass Analysis

Tolerance = 5.0 mDa / DBE: min = -1.5, max = 50.0

Element prediction: Off

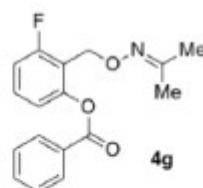

#### Monoisotopic Mass, Odd and Even Electron Ions

361 formula(e) evaluated with 34 results within limits (all results (up to 1000) for each mass)

Elements Used:

C: 0-17 H: 0-16 N: 0-1 O: 0-3 F: 0-1

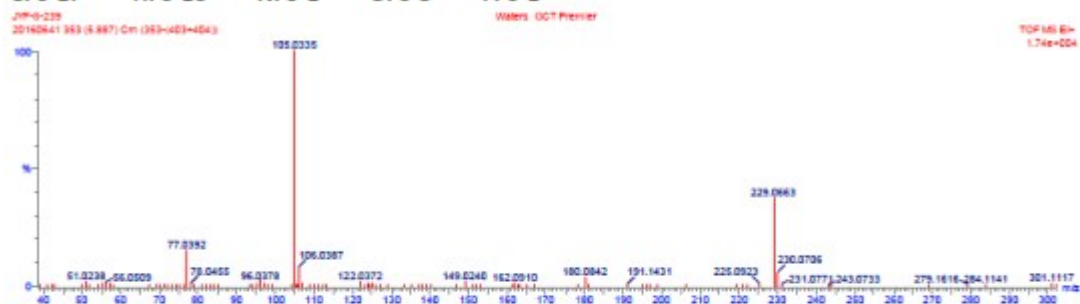

Minimum: 0.70  
Maximum: 100.00 5.0 10.0 -1.5

| Mass     | RA   | Calc. Mass | mDa | PPM | DBE  | i-FIT     | Formula        |
|----------|------|------------|-----|-----|------|-----------|----------------|
| 301.1117 | 0.72 | 301.1114   | 0.3 | 1.0 | 10.0 | 2773014.8 | C17 H16 N O3 F |

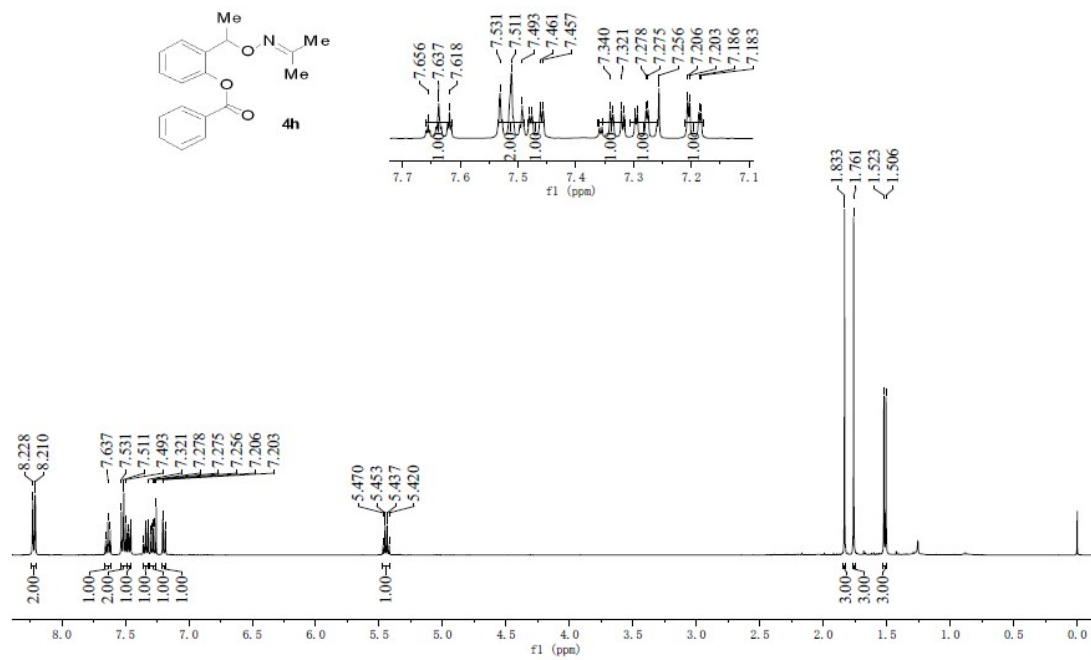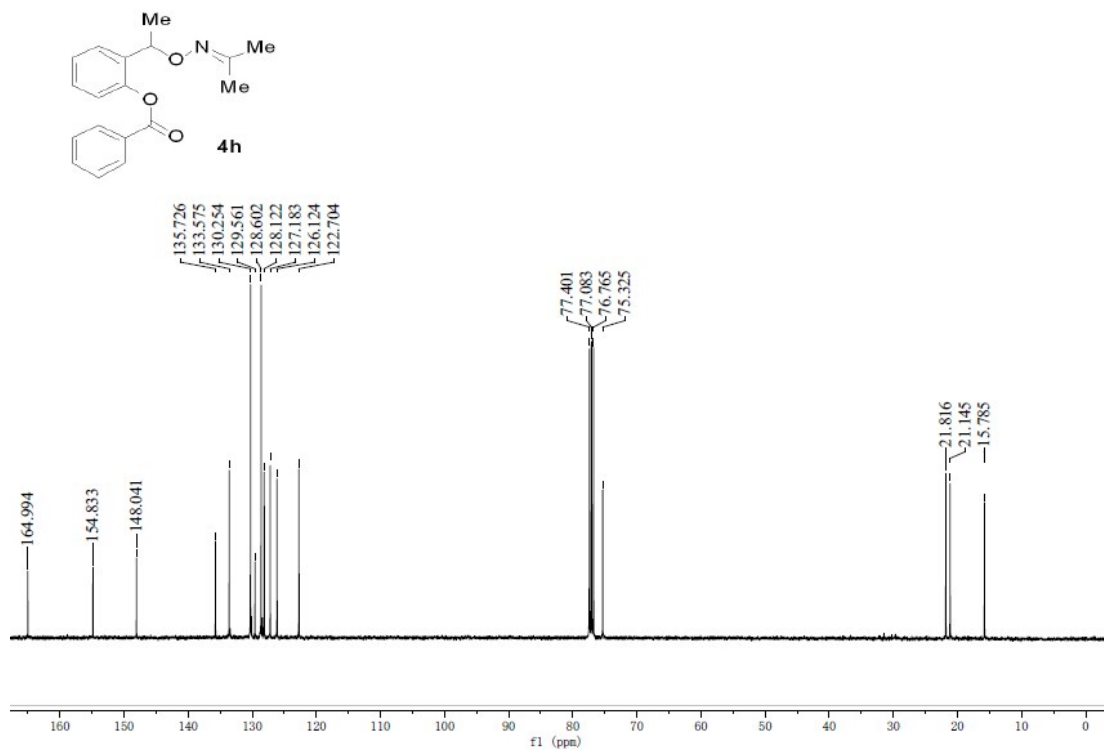

Elemental Composition Report

Single Mass Analysis

Tolerance = 5.0 mDa / DBE: min = -1.5, max = 50.0

Element prediction: Off

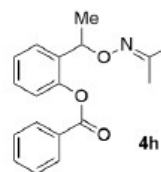

Monoisotopic Mass, Odd and Even Electron Ions

103 formula(e) evaluated with 8 results within limits (all results (up to 1000) for each mass)

Elements Used:

C: 0-18 H: 0-19 N: 0-1 O: 0-3

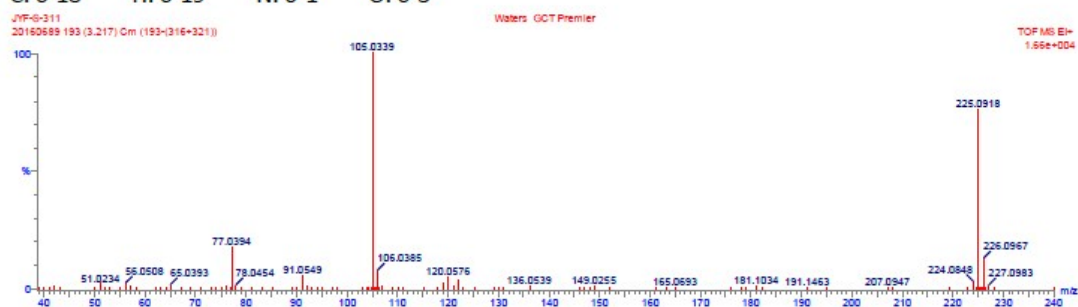

Minimum: 3.00  
Maximum: 100.00

| Mass     | RA    | Calc. Mass | mDa  | PPM   | DBE | i-FIT | Formula    |
|----------|-------|------------|------|-------|-----|-------|------------|
| 226.0967 | 12.50 | 226.0994   | -2.7 | -11.9 | 9.0 | 38.0  | C15 H14 O2 |

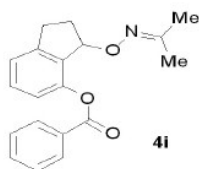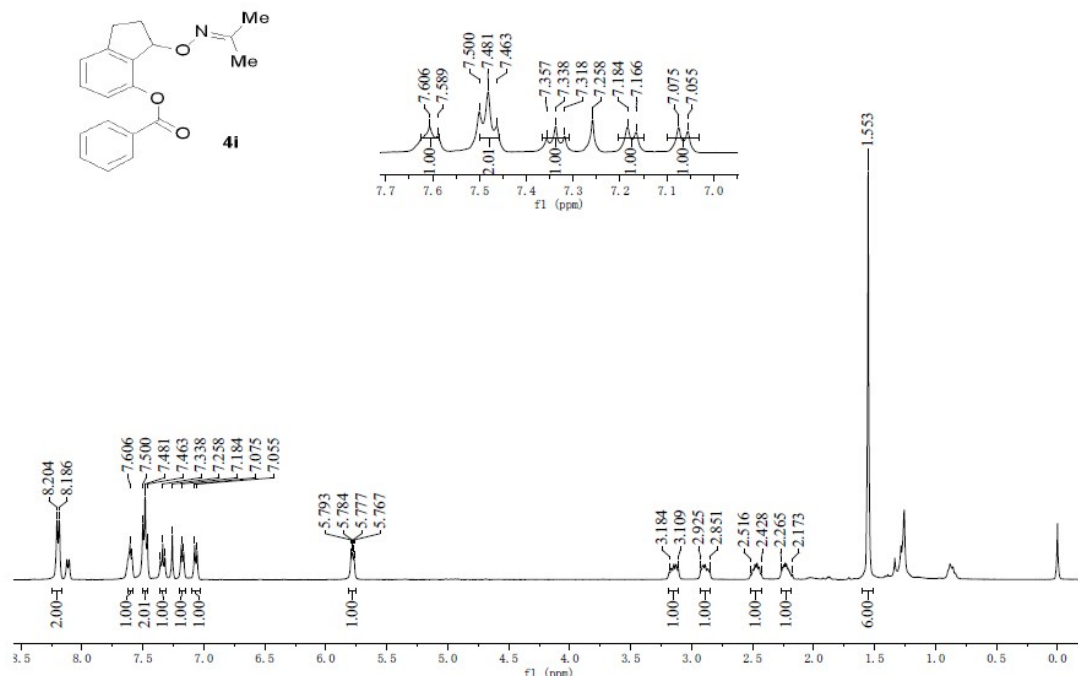

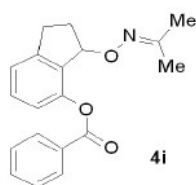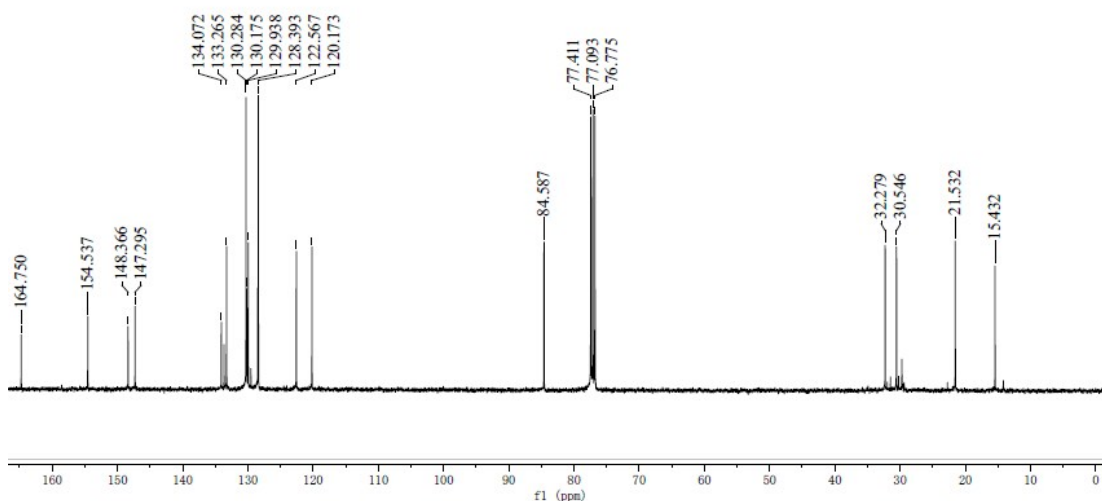

### Elemental Composition Report

#### Single Mass Analysis

Tolerance = 5.0 mDa / DBE: min = -1.5, max = 50.0

Element prediction: Off

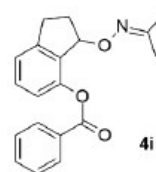

#### Monoisotopic Mass, Odd and Even Electron Ions

763 formula(e) evaluated with 48 results within limits (all results (up to 1000) for each mass)

Elements Used:

C: 0-19 H: 0-19 N: 0-1 O: 0-3

JYF-G-301  
20190587 385 (8.417) Cm (385-(106+499))

Waters GCT Premier

TOF MS EI-  
2.14e+004

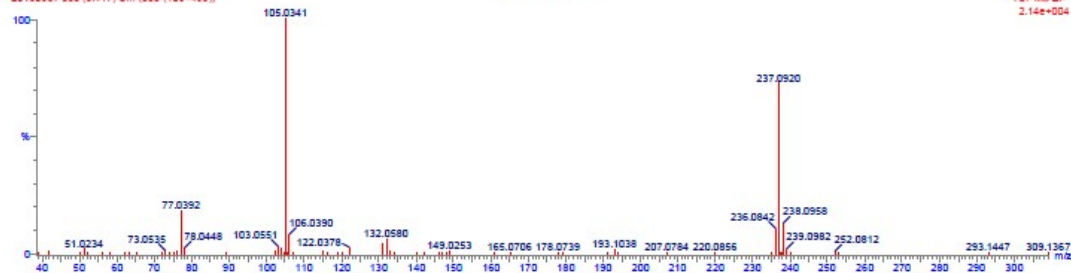

Minimum: 0.14  
Maximum: 100.00 5.0 10.0 50.0

| Mass     | RA   | Calc. Mass | mDa | PPM | DBE  | i-FIT     | Formula      |
|----------|------|------------|-----|-----|------|-----------|--------------|
| 309.1367 | 0.15 | 309.1365   | 0.2 | 0.6 | 11.0 | 5546032.5 | C19 H19 N O3 |

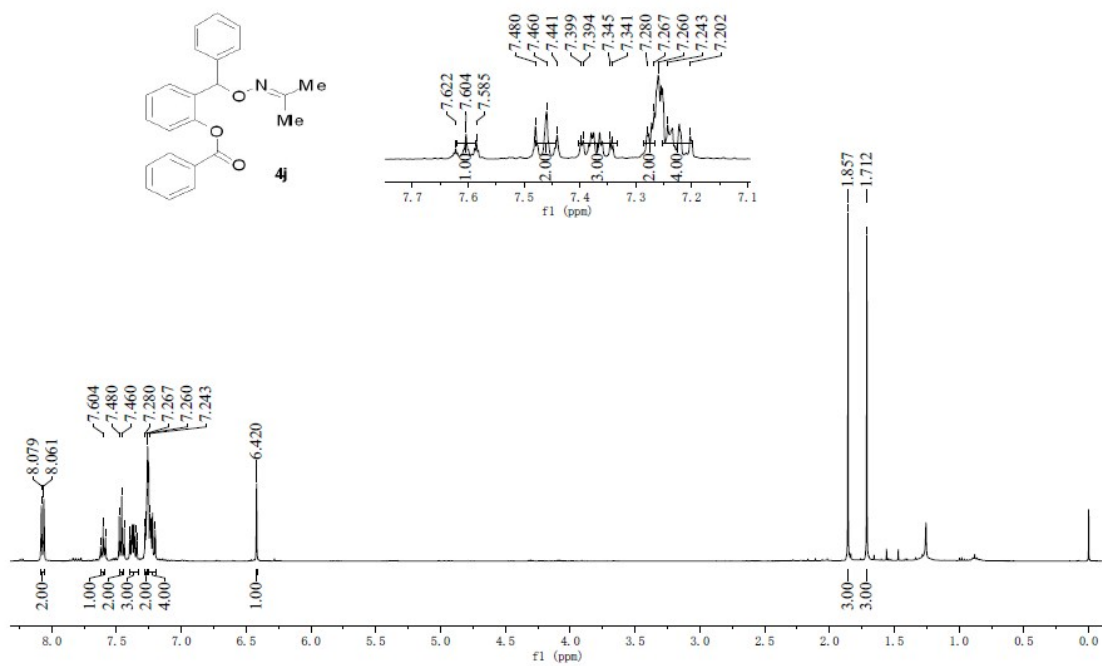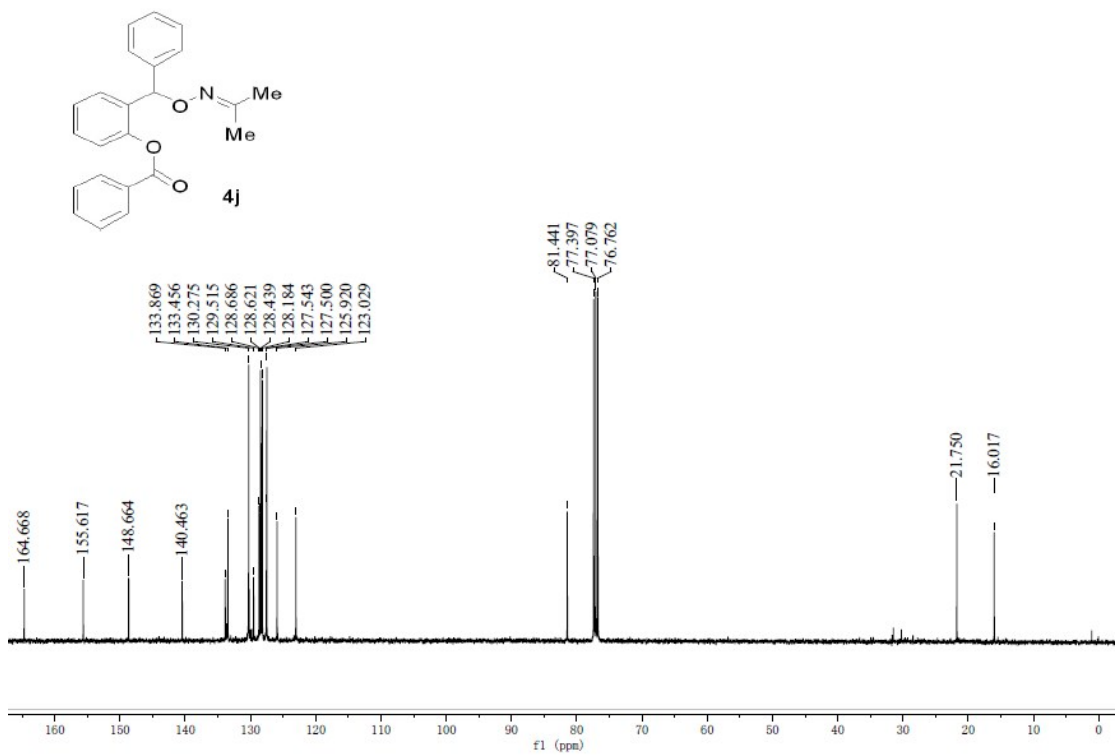

## Elemental Composition Report

### Single Mass Analysis

Tolerance = 5.0 mDa / DBE: min = -1.5, max = 50.0

Element prediction: Off

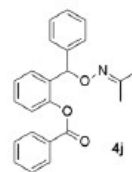

### Monoisotopic Mass, Odd and Even Electron Ions

113 formula(e) evaluated with 8 results within limits (all results (up to 1000) for each mass)

Elements Used:

C: 0-23 H: 0-21 N: 0-1 O: 0-3

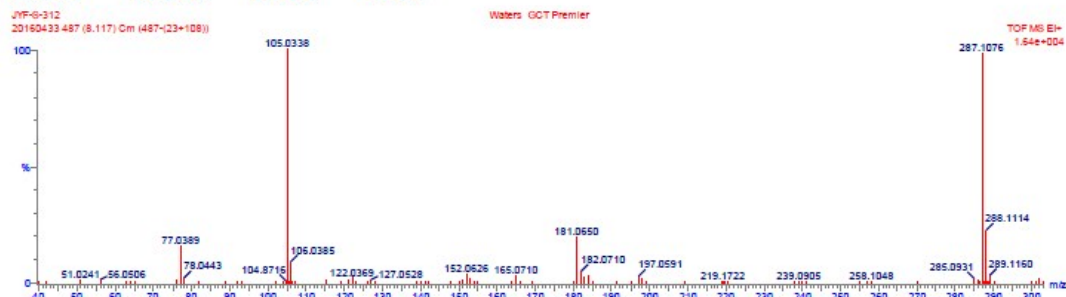

Minimum: 3.00  
Maximum: 100.00

| Mass     | RA    | Calc. Mass | mDa  | PPM   | DBE  | i-FIT | Formula    |
|----------|-------|------------|------|-------|------|-------|------------|
| 288.1114 | 21.80 | 288.1150   | -3.6 | -12.5 | 13.0 | 121.1 | C20 H16 O2 |

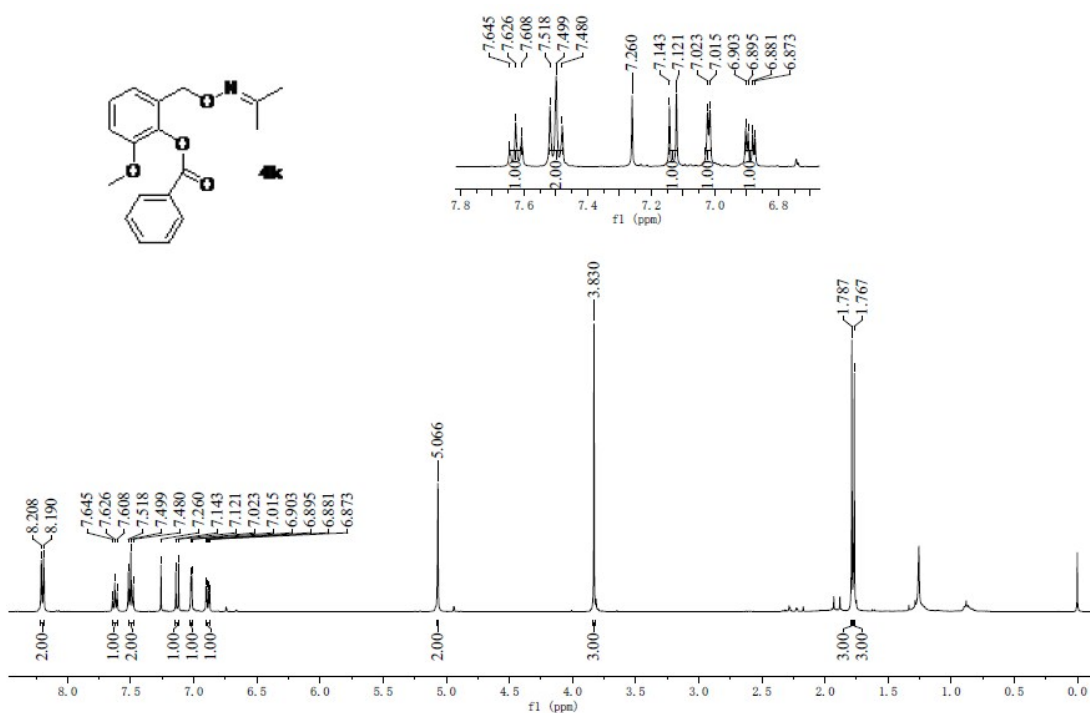

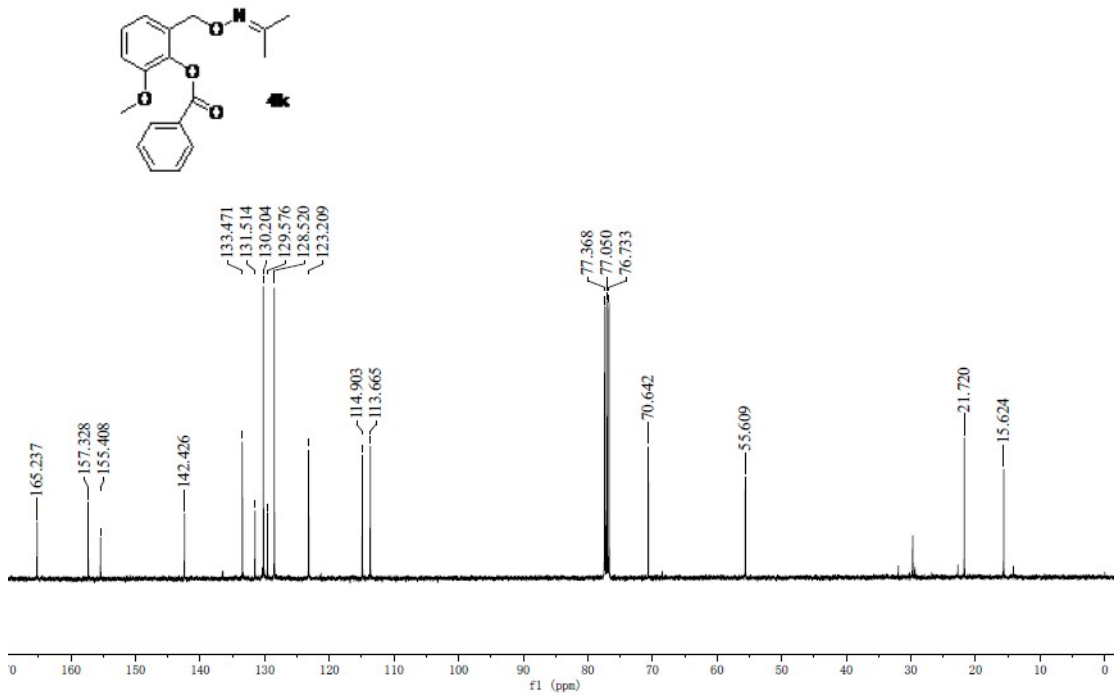

#### Elemental Composition Report

##### Single Mass Analysis

Tolerance = 5.0 mDa / DBE: min = -1.5, max = 50.0

Element prediction: Off

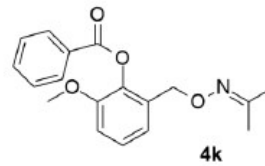

##### Monoisotopic Mass, Odd and Even Electron Ions

157 formula(e) evaluated with 12 results within limits (all results (up to 1000) for each mass)

Elements Used:

C: 0-18 H: 0-19 N: 0-1 O: 0-4

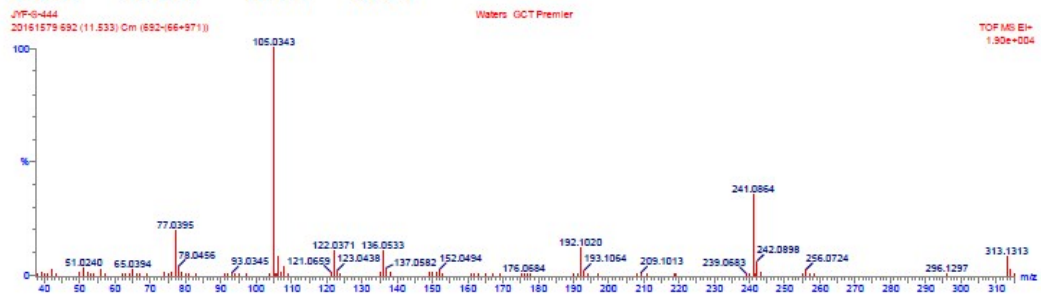

Minimum: 3.00  
Maximum: 100.00

| Mass     | RA   | Calc. Mass | mDa  | PPM  | DBE  | i-FIT | Formula      |
|----------|------|------------|------|------|------|-------|--------------|
| 313.1313 | 7.51 | 313.1314   | -0.1 | -0.3 | 10.0 | 0.8   | C18 H19 N O4 |

### 5.3 Copies of the spectra for Scheme 5



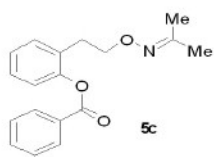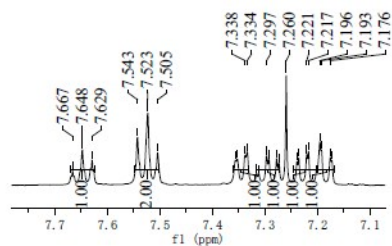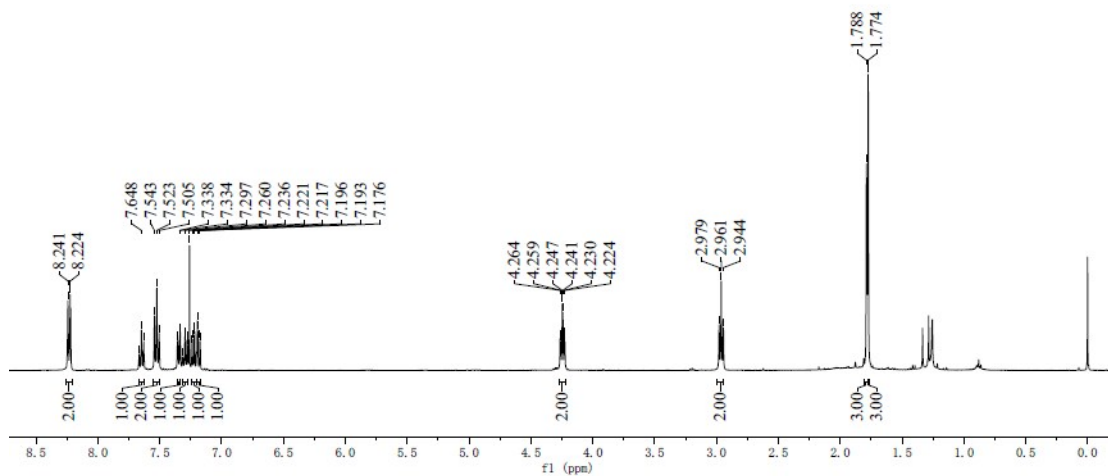



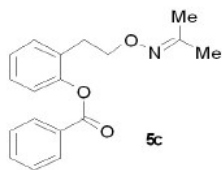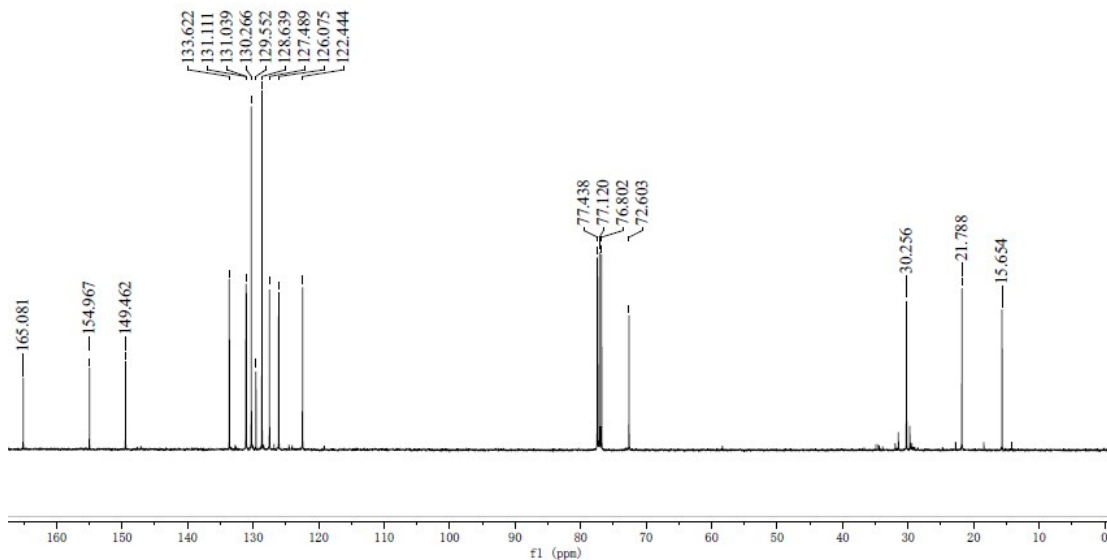

### Elemental Composition Report

#### Multiple Mass Analysis

Tolerance = 5.0 mDa / DBE: min = -1.5, max = 50.0

Element prediction: Off

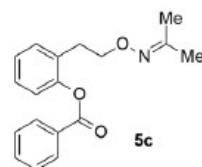

#### Monoisotopic Mass, Odd and Even Electron Ions

584 formula(e) evaluated with 46 results within limits (all results (up to 1000) for each mass)

Elements Used:

C: 0-18 H: 0-19 N: 0-1 O: 0-3

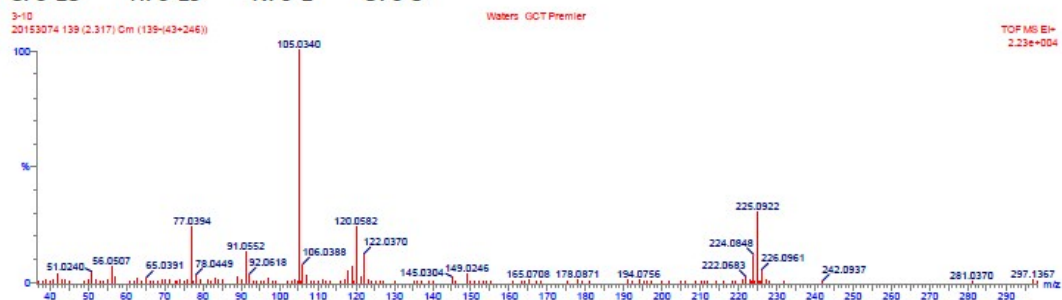

Minimum: 0.69  
Maximum: 100.00 5.0 10.0 -1.5 50.0

| Mass     | RA   | Calc. Mass | mDa | PPM | DBE  | i-FIT     | Formula      |
|----------|------|------------|-----|-----|------|-----------|--------------|
| 297.1367 | 0.70 | 297.1365   | 0.2 | 0.7 | 10.0 | 2773017.0 | C18 H19 N O3 |

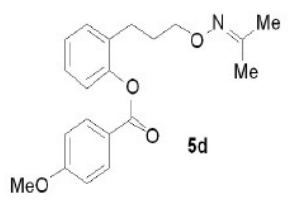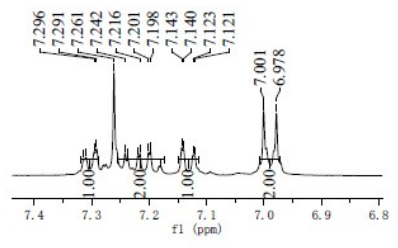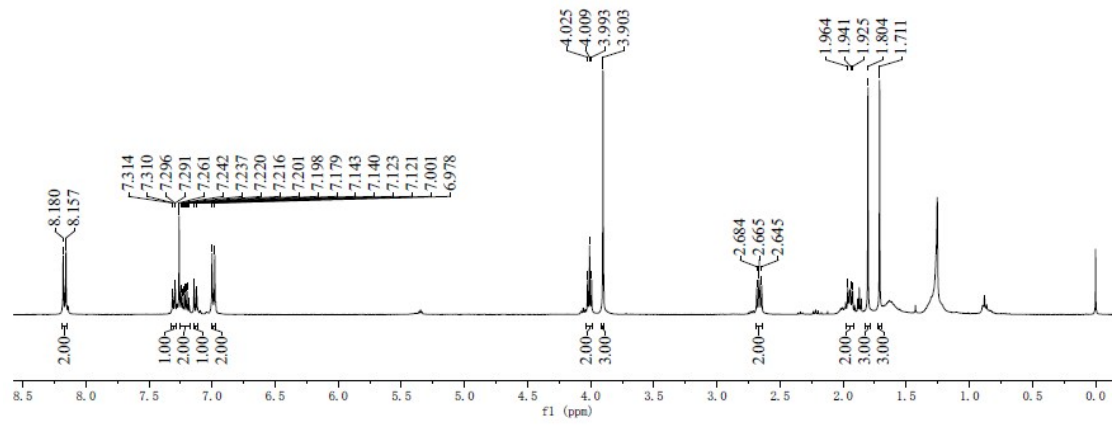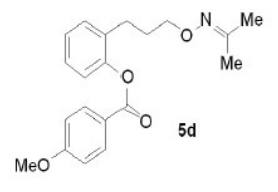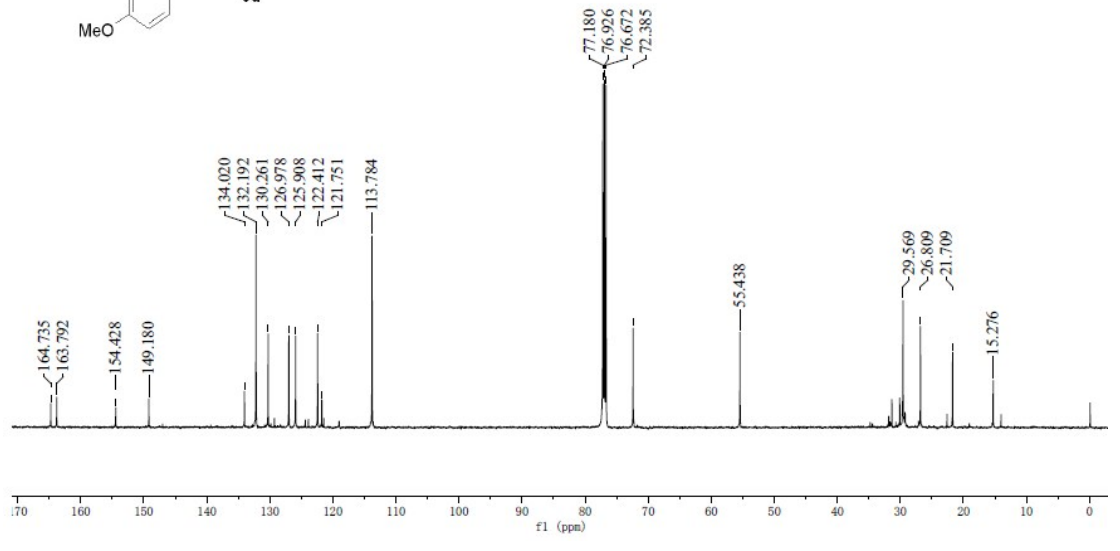

## Elemental Composition Report

### Multiple Mass Analysis

Tolerance = 5.0 mDa / DBE: min = -1.5, max = 50.0

Element prediction: Off

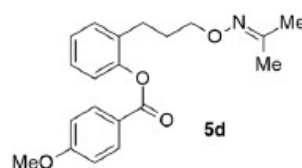

### Monoisotopic Mass, Odd and Even Electron Ions

3398 formula(e) evaluated with 162 results within limits (all results (up to 1000) for each mass)

Elements Used:

C: 0-20 H: 0-23 N: 0-1 O: 0-4

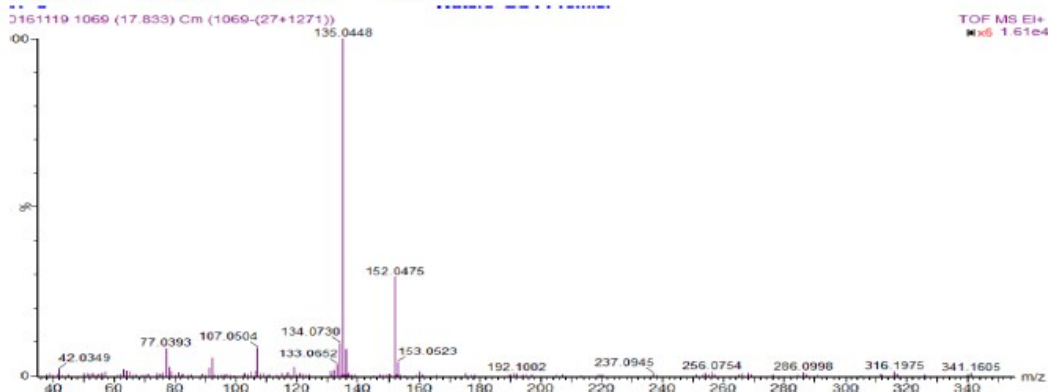

Minimum: 0.10  
Maximum: 100.00 5.0 10.0 -1.5 50.0

| Mass     | RA   | Calc. Mass | mDa  | PPM  | DBE  | i-FIT     | Formula      |
|----------|------|------------|------|------|------|-----------|--------------|
| 341.1605 | 0.11 | 341.1627   | -2.2 | -6.4 | 10.0 | 5546028.0 | C20 H23 N O4 |

## 5.4 Copies of the spectra for Scheme 6

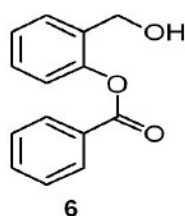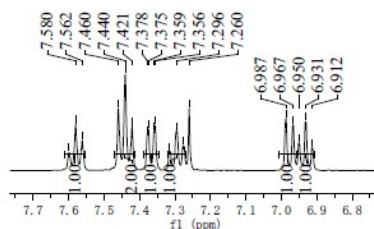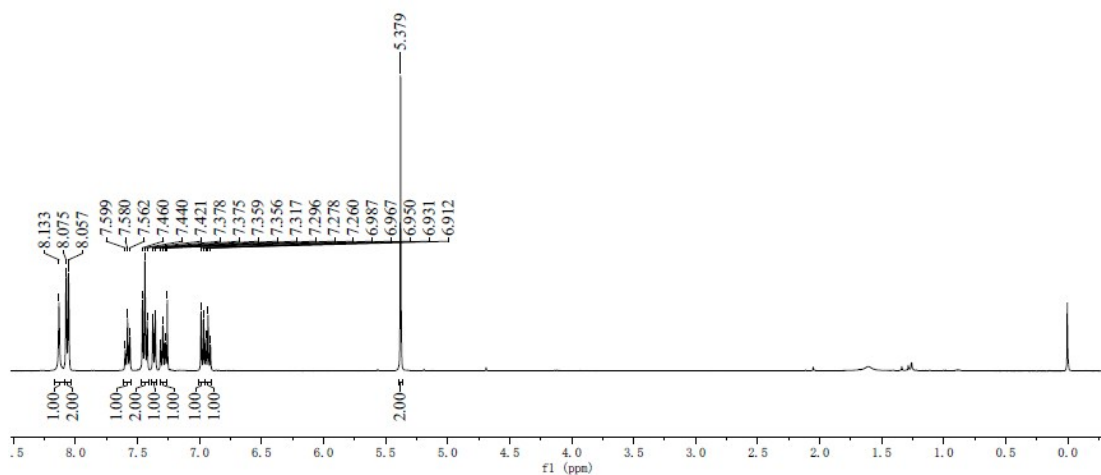

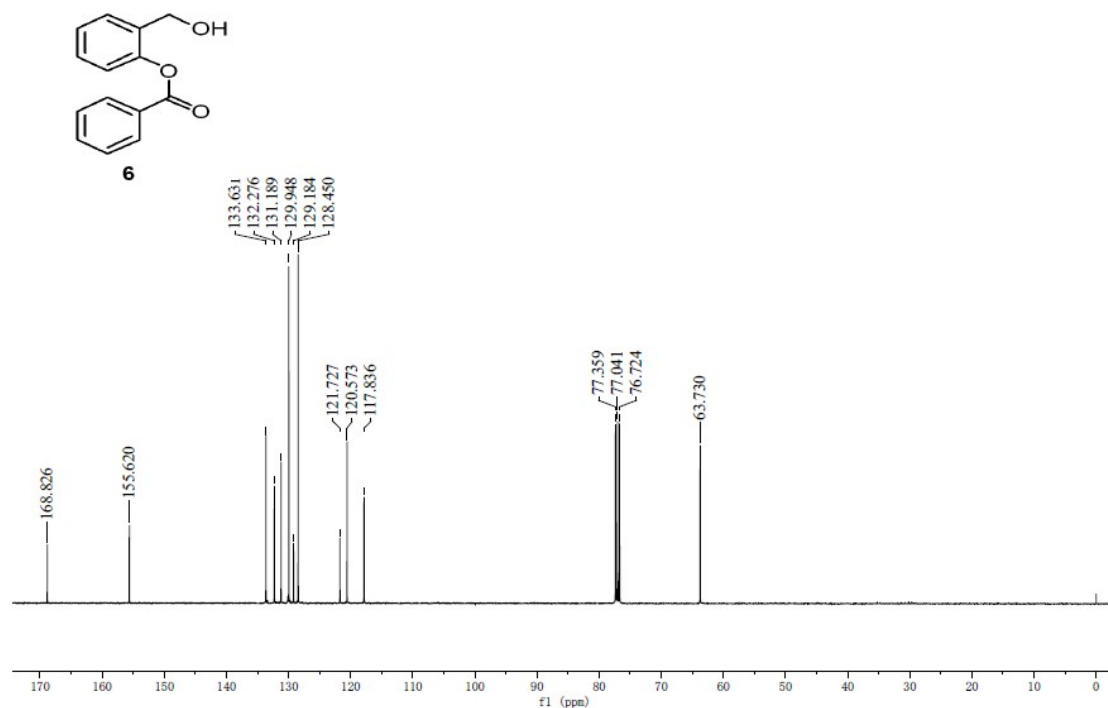

### Elemental Composition Report

#### Multiple Mass Analysis

Tolerance = 5.0 mDa / DBE: min = -1.5, max = 50.0

Element prediction: Off

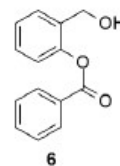

#### Monoisotopic Mass, Odd and Even Electron Ions

63 formula(e) evaluated with 14 results within limits (all results (up to 1000) for each mass)

Elements Used:

C: 0-14 H: 0-12 O: 0-3

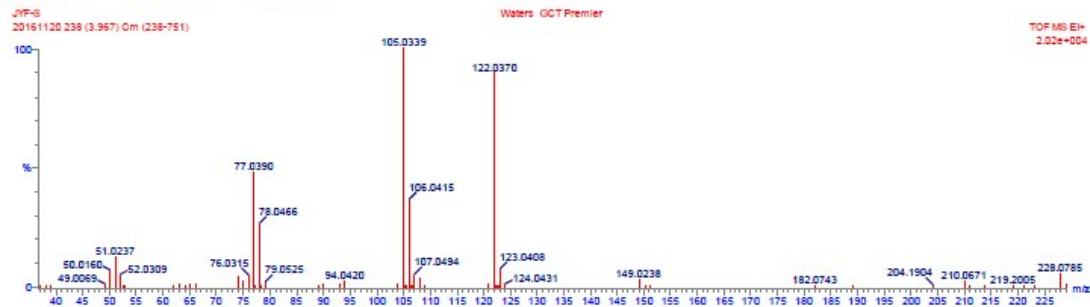

|          |        |            |      |      |      |           |            |      |
|----------|--------|------------|------|------|------|-----------|------------|------|
| Minimum: | 3.00   |            |      |      |      |           |            | -1.5 |
| Maximum: | 100.00 |            | 5.0  | 10.0 | 50.0 |           |            |      |
| Mass     | RA     | Calc. Mass | mDa  | PPM  | DBE  | i-FIT     | Formula    |      |
| 228.0785 | 5.38   | 228.0786   | -0.1 | -0.4 | 9.0  | 2773137.5 | C14 H12 O3 |      |

### 5.5 Copies of the spectra for Scheme 7

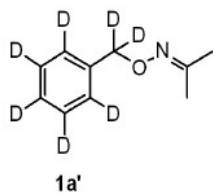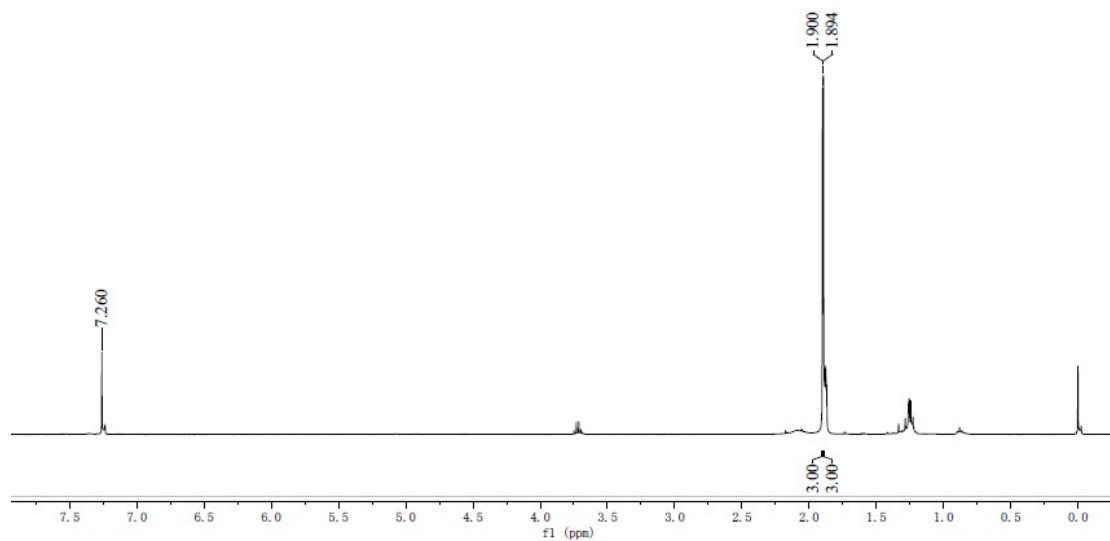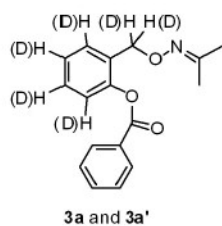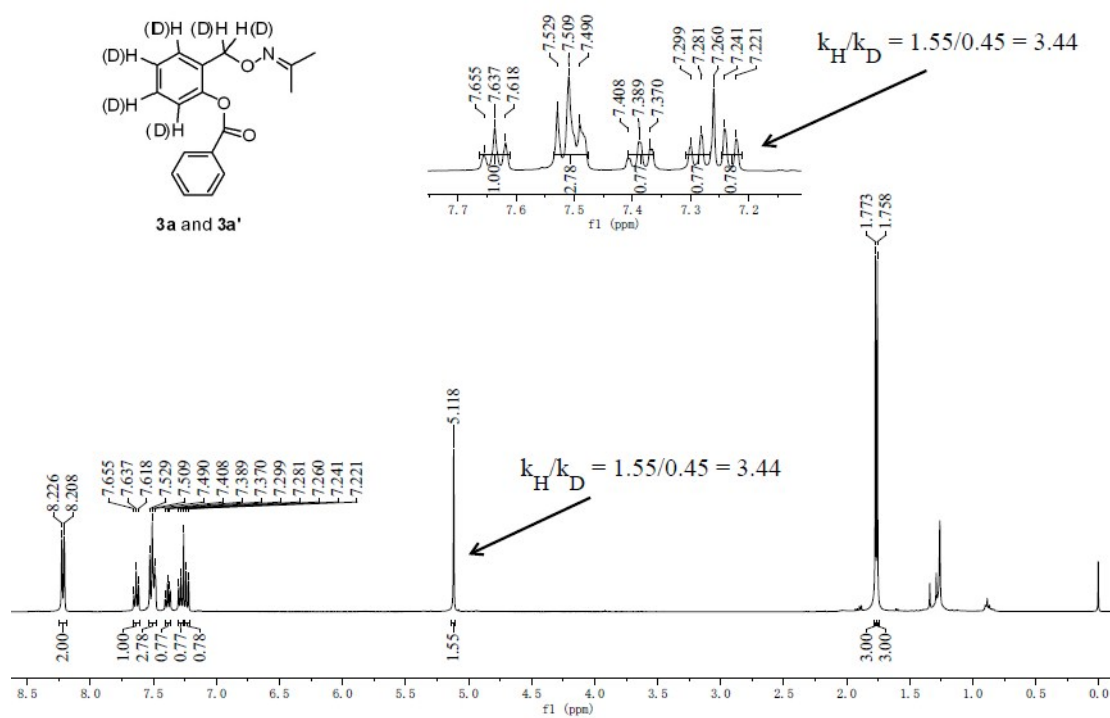

Supplement: c6ra16105g1.pdf [file c6ra16105g1.pdf]
